# Supplementary material for: Fine-tuned large language models for answering questions about full-text biomedical research studies
Source: medRxiv preprint, doi:10.1101/2024.10.28.24316263, version 2 (2024-11-25)
Supplement: S1 Table [file 316263_file02.xlsx]

## Sheet: Sheet1
Title	Author	Journal	Year	PMID
The S230R Integrase Substitution Associated With Virus Load Rebound During Dolutegravir Monotherapy Confers Low-Level Resistance to Integrase Strand-Transfer Inhibitors.	Pham HT; Labrie L; Wijting IEA; Hassounah S; Lok KY; Portna I; Goring ME; Han Y; Lungu C; van der Ende ME; Brenner BG; Boucher CA; Rijnders BJA; van Kampen JJA; Mesplède T; Wainberg MA	J Infect Dis	2018	29617824
Differential effects of the G118R, H51Y, and E138K resistance substitutions in different subtypes of HIV integrase.	Quashie PK; Oliviera M; Veres T; Osman N; Han YS; Hassounah S; Lie Y; Huang W; Mesplède T; Wainberg MA	J Virol	2015	25552724
M184I/V substitutions and E138K/M184I/V double substitutions in HIV reverse transcriptase do not significantly affect the antiviral activity of EFdA.	Oliveira M; Brenner BG; Xu H; Ibanescu RI; Mesplède T; Wainberg MA	J Antimicrob Chemother	2017	28961903
Absence of Resistance Mutations in the Integrase Coding Region among ART-Experienced Patients in the Republic of the Congo.	Got FEB; Recordon-Pinson P; Loubano-Voumbi G; Ebourombi D; Blondot ML; Metifiot M; Ondzotto G; Andreola ML	Microorganisms	2021	34835480
Genetic diversity of HIV-1 and transmitted drug resistance among newly diagnosed individuals with HIV infection in Hangzhou, China.	Zhang J; Guo Z; Yang J; Pan X; Jiang J; Ding X; Zhang W; Xia Y; Xu Y; Huang J	J Med Virol	2015	25899877
Integrase strand transfer inhibitor resistance mediated by R263K plus E157Q in a patient with HIV infection treated with bictegravir/tenofovir alafenamide/emtricitabine: case report and review of the literature.	Buzon-Martin L; Navarro-San Francisco C; Fernandez-Regueras M; Sanchez-Gomez L	J Antimicrob Chemother	2024	38558010
Convenience, efficacy, safety, and durability of INSTI-based antiretroviral therapies: evidence from the Italian MaSTER cohort.	Rich SN; Nasta P; Quiros-Roldan E; Fusco P; Tondinelli A; Costa C; Fornabaio C; Mazzini N; Prosperi M; Torti C; Carosi G; MaSTER cohort group	Eur J Med Res	2023	37596688
Efficacy, Convenience, Safety and Durability of DTG-Based Antiretroviral Therapies: Evidence from a Prospective Study by the Italian MaSTER Cohort.	Fusco P; Nasta P; Quiros-Roldan E; Tondinelli A; Costa C; Fornabaio C; Mazzini N; Prosperi M; Torti C; Carosi G	Viruses	2023	37112904
Emergence of Resistance to Integrase Strand Transfer Inhibitors during Dolutegravir Containing Triple-Therapy in a Treatment-Experienced Patient with Pre-Existing M184V/I Mutation.	Braun DL; Scheier T; Ledermann U; Flepp M; Metzner KJ; Böni J; Günthard HF	Viruses	2020	33228206
Prevalence and Phenotypic Susceptibility to Doravirine of the HIV-1 Reverse Transcriptase V106I Polymorphism in B and Non-B Subtypes.	Giammarino F; de Salazar A; Malet I; Viñuela L; Fuentes A; Saladini F; Bartolini N; Charpentier C; Lambert-Niclot S; Sterrantino G; Colao MG; Micheli V; Bertoli A; Fabeni L; Teyssou E; Delgado R; Falces-Romero I; Aguilera A; Gomes P; Paraskevis D; Santoro MM; Ceccherini-Silberstein F; Marcelin AG; Moreno C; Zazzi M; García F	J Infect Dis	2024	38206187
Evaluation of a Novel In-house HIV-1 Genotype Drug Resistance Assay using Clinical Samples in China.	Gao P; Yu F; Yang X; Li D; Shi Y; Wang Y; Zhang F	Curr HIV Res	2022	34515004
Heavily treatment-experienced people living with HIV in the OPERA® cohort: population characteristics and clinical outcomes.	Hsu RK; Fusco JS; Henegar CE; Vannappagari V; Clark A; Brunet L; Lackey PC; Pierone G; Fusco GP	BMC Infect Dis	2023	36782125
Rapid HIV RNA rebound after antiretroviral treatment interruption in persons durably suppressed in Fiebig I acute HIV infection.	Colby DJ; Trautmann L; Pinyakorn S; Leyre L; Pagliuzza A; Kroon E; Rolland M; Takata H; Buranapraditkun S; Intasan J; Chomchey N; Muir R; Haddad EK; Tovanabutra S; Ubolyam S; Bolton DL; Fullmer BA; Gorelick RJ; Fox L; Crowell TA; Trichavaroj R; O'Connell R; Chomont N; Kim JH; Michael NL; Robb ML; Phanuphak N; Ananworanich J; RV411 study group	Nat Med	2018	29892063
In vitro resistance selection with doravirine (MK-1439), a novel nonnucleoside reverse transcriptase inhibitor with distinct mutation development pathways.	Feng M; Wang D; Grobler JA; Hazuda DJ; Miller MD; Lai MT	Antimicrob Agents Chemother	2015	25385110
Efficacy and Safety of Two-Drug Regimens with Dolutegravir plus Rilpivirine or Lamivudine in HIV-1 Virologically Suppressed People Living with HIV.	Dueñas-Gutiérrez C; Buzón L; Pedrero-Tomé R; Iribarren JA; De Los Santos I; De la Fuente S; Pousada G; Moran MA; Moreno E; Ferreira E; Gómez J; Troya J	Viruses	2023	37112915
Measuring the latent reservoir for HIV-1: Quantification bias in near full-length genome sequencing methods.	White JA; Kufera JT; Bachmann N; Dai W; Simonetti FR; Armstrong C; Lai J; Beg S; Siliciano JD; Siliciano RF	PLoS Pathog	2022	36074794
Increased virological failure in naive HIV-1-infected patients taking lamivudine compared with emtricitabine in combination with tenofovir and efavirenz or nevirapine in the Dutch nationwide ATHENA cohort.	Rokx C; Fibriani A; van de Vijver DA; Verbon A; Schutten M; Gras L; Rijnders BJ; AIDS Therapy Evaluation in the Netherlands National Observational Cohort	Clin Infect Dis	2015	25273080
Limited emergence of resistance to integrase strand transfer inhibitors (INSTIs) in ART-experienced participants failing dolutegravir-based antiretroviral therapy: a cross-sectional analysis of a Northeast Nigerian cohort.	Abdullahi A; Kida IM; Maina UA; Ibrahim AH; Mshelia J; Wisso H; Adamu A; Onyemata JE; Edun M; Yusuph H; Aliyu SH; Charurat M; Abimiku A; Abeler-Dorner L; Fraser C; Bonsall D; PANGEA consortium; Kemp SA; Gupta RK	J Antimicrob Chemother	2023	37367727
Prevalence of Pretreatment HIV-1 Drug Resistance in Armenia in 2017-2018 and 2020-2021 following a WHO Survey.	Kirichenko A; Kireev D; Lapovok I; Shlykova A; Lopatukhin A; Pokrovskaya A; Ladnaya N; Grigoryan T; Petrosyan A; Sarhatyan T; Sargsyants N; Hovsepyan T; Ghazaryan H; Hovakimyan H; Martoyan S; Pokrovsky V	Viruses	2022	36366418
Barrier to Resistance of Dolutegravir in Two-Drug Combinations.	Yoshinaga T; Miki S; Kawauchi-Miki S; Seki T; Fujiwara T	Antimicrob Agents Chemother	2019	30602514
The R262K substitution combined with H51Y in HIV-1 subtype B integrase confers low-level resistance against dolutegravir.	Cutillas V; Mesplede T; Anstett K; Hassounah S; Wainberg MA	Antimicrob Agents Chemother	2015	25348535
Low prevalence of the transmitted HIV-1 drug resistance among newly diagnosed HIV-1 individuals in Jiangsu Province, China during 2009-2011.	Guo H; Xu X; Hu H; Zhou Y; Yang H; Qiu T; Fu G; Huan X	BMC Public Health	2015	25879488
Residual phenotypic susceptibility to doravirine in multidrug-resistant HIV-1 from subjects enrolled in the PRESTIGIO Registry.	Saladini F; Giammarino F; Maggiolo F; Ferrara M; Cenderello G; Celesia BM; Martellotta F; Spagnuolo V; Corbelli GM; Gianotti N; Santoro MM; Rusconi S; Zazzi M; Castagna A; PRESTIGIO Study Group	Int J Antimicrob Agents	2023	36708743
Antiviral activity of tenofovir alafenamide (TAF) against HIV-1 clinical isolates harboring K65R.	Cox S; Margot N; Callebaut C	J Med Virol	2023	37185867
Doravirine/lamivudine/tenofovir disoproxil fumarate in virologically suppressed people living with HIV: A real-life experience.	Calza L; Colangeli V; Pensalfine G; Appolloni L; Vitale S; Bon I; Viale P	Int J STD AIDS	2023	37565832
HIV-2 diversity displays two clades within group A with distinct geographical distribution and evolution.	Visseaux B; Bertine M; Le Hingrat Q; Ferré V; Charpentier C; Collin F; Damond F; Matheron S; Hué S; Descamps D	Virus Evol	2021	34422316
Sequencing and phylogenetic analysis of near full-length HIV-1 subtypes A, B, G and unique recombinant AC and AD viral strains identified in South Africa.	Wilkinson E; Holzmayer V; Jacobs GB; de Oliveira T; Brennan CA; Hackett J; van Rensburg EJ; Engelbrecht S	AIDS Res Hum Retroviruses	2015	25492033
Analysis of drug resistance in children receiving antiretroviral therapy for treatment of HIV-1 infection in Uganda.	Towler WI; Barlow-Mosha L; Church JD; Bagenda D; Ajuna P; Mubiru M; Musoke P; Eshleman SH	AIDS Res Hum Retroviruses	2010	20455758
High HIV-1 diversity in immigrants resident in Italy (2008-2017).	Maggiorella MT; Sanarico N; Brindicci G; Monno L; Santoro CR; Coppola N; Cuomo N; Azzurri A; Cesario F; Luciani F; El-Hamad I; D'Ettorre G; Turriziani O; Mazzuti L; Poggi A; Vichi F; Mariabelli E; Surace L; Berardelli G; Picconi O; Cenci A; Sernicola L; Rovetto C; Fulgenzi D; Belli R; Salvi E; Zeo PD; Borsetti A; Ridolfi B; Losappio R; Zoboli F; Schietroma I; Cella E; Angeletti S; Ciccozzi M; D'A…	Sci Rep	2020	32094387
Efficacy, Safety, and Tolerability of Doravirine/Lamivudine/Tenofovir Disoproxil Fumarate Fixed-Dose Combination Tablets in Adolescents Living With HIV: Results Through Week 96 from IMPAACT 2014.	Rungmaitree S; Aurpibul L; Best BM; Li X; Warshaw MG; Wan H; Tobin NH; Jumes P; Leavitt R; McCarthy K; Scheckter R; Ounchanum P; Violari A; Teppler H; Campbell H; Krotje C; Townley E; Moye J; Melvin AJ; IMPAACT 2014 study team	J Pediatric Infect Dis Soc	2023	37815035
Pre-treatment integrase inhibitor resistance is uncommon in antiretroviral therapy-naive individuals with HIV-1 subtype A1 and D infections in Uganda.	McCluskey SM; Kamelian K; Musinguzi N; Kigozi S; Boum Y; Bwana MB; Muzoora C; Brumme ZL; Carrington M; Carlson J; Foley B; Hunt PW; Martin JN; Bangsberg DR; Harrigan PR; Siedner MJ; Haberer JE; Lee GQ	AIDS	2021	33635845
Prevalence of HIV drug resistance in Nigeria: results from a cross-sectional, population-based survey of Nigerian adults with unsuppressed viral load.	Aliyu GG; Lawton JG; Mitchell AB; Abimiku AG; Jelpe T; Bassey O; Riedel DJ; Swaminathan M; Chang JC; DeVos JR; Patel H; Charurat ME; Stafford KA; on behalf on the NAIIS Study Group	AIDS	2023	36541644
Islatravir Has a High Barrier to Resistance and Exhibits a Differentiated Resistance Profile from Approved Nucleoside Reverse Transcriptase Inhibitors (NRTIs).	Diamond TL; Ngo W; Xu M; Goh SL; Rodriguez S; Lai MT; Asante-Appiah E; Grobler JA	Antimicrob Agents Chemother	2022	35546110
Treatment-emergent reverse transcriptase resistance during antiretroviral therapy with bictegravir, tenofovir alafenamide, and emtricitabine: A case series.	DeKoven S; Naccarato M; Brumme CJ; Tan DHS	HIV Med	2023	37317505
Adaptive changes in HIV-1 subtype C proteins during early infection are driven by changes in HLA-associated immune pressure.	Treurnicht FK; Seoighe C; Martin DP; Wood N; Abrahams MR; Rosa Dde A; Bredell H; Woodman Z; Hide W; Mlisana K; Karim SA; Gray CM; Williamson C	Virology	2010	19913270
Targeting HIV Prevention Based on Molecular Epidemiology Among Deeply Sampled Subnetworks of Men Who Have Sex With Men.	Wang X; Wu Y; Mao L; Xia W; Zhang W; Dai L; Mehta SR; Wertheim JO; Dong X; Zhang T; Wu H; Smith DM	Clin Infect Dis	2015	26129754
Primary resistance against integrase strand transfer inhibitors in integrase strand transfer inhibitor-naive patients failing first- and second-line ART in Tanzania.	Henerico S; Lyimo E; Makubi AN; Magesa D; Desderius B; Mueller A; Changalucha J; Kalluvya SE; Van Zyl G; Preiser W; Mshana SE; Kasang C	J Antimicrob Chemother	2022	36101479
Gag-protease-mediated replication capacity in HIV-1 subtype C chronic infection: associations with HLA type and clinical parameters.	Wright JK; Brumme ZL; Carlson JM; Heckerman D; Kadie CM; Brumme CJ; Wang B; Losina E; Miura T; Chonco F; van der Stok M; Mncube Z; Bishop K; Goulder PJ; Walker BD; Brockman MA; Ndung'u T	J Virol	2010	20702636
Viral suppression in the era of transition to dolutegravir-based therapy in Cameroon: Children at high risk of virological failure due to the lowly transition in pediatrics.	Fokam J; Nka AD; Mamgue Dzukam FY; Efakika Gabisa J; Bouba Y; Tommo Tchouaket MC; Ka'e AC; Ngoufack Jagni Semengue E; Takou D; Moudourou S; Fainguem N; Pabo W; Nayang Mundo RA; Kengni Ngueko AM; Ambe Chenwi C; Flore Yimga J; Nnomo Zam MK; Simo Kamgaing R; Tangimpundu C; Kamgaing N; Njom-Nlend AE; Ndombo Koki P; Kesseng D; Ndiang Tetang S; Kembou E; Ebiama Lifanda L; Pamen B; Ketchaji A; Saounde T…	Medicine (Baltimore)	2023	37335723
Prevalence of resistance mutations associated with integrase inhibitors in therapy-naive HIV-positive patients in Baoding, Hebei province, China.	Fan W; Wang X; Zhang Y; Meng J; Su M; Yang X; Shi H; Shi P; Lu X	Front Genet	2022	36186451
Antiretroviral Drug Resistance Mutations among HIV Treatment Failure Patients in Tehran, Iran.	Farrokhi M; Moallemi S; Shirkoohi R; Golmohammadi R; Ahsani-Nasab S; Sardashti S; Abbasian L; Baesi K; Mohraz M	Iran J Public Health	2017	29026792
The prevalence of drug resistance among treatment-naïve HIV-1-infected individuals in China during pre- and post- 2004.	Li H; Chang S; Han Y; Zhuang D; Li L; Liu Y; Liu S; Bao Z; Zhang W; Song H; Li T; Li J	BMC Infect Dis	2016	27782811
Genetic Characterization of a Panel of Diverse HIV-1 Isolates at Seven International Sites.	Hora B; Keating SM; Chen Y; Sanchez AM; Sabino E; Hunt G; Ledwaba J; Hackett J; Swanson P; Hewlett I; Ragupathy V; Vikram Vemula S; Zeng P; Tee KK; Chow WZ; Ji H; Sandstrom P; Denny TN; Busch MP; Gao F; REDS-III and EQAPOL programs	PLoS One	2016	27314585
HIV-1 DNA sequence diversity and evolution during acute subtype C infection.	Lee GQ; Reddy K; Einkauf KB; Gounder K; Chevalier JM; Dong KL; Walker BD; Yu XG; Ndung'u T; Lichterfeld M	Nat Commun	2019	31227699
Emergent dolutegravir resistance in integrase-naïve, treatment experienced patients from Zimbabwe.	Mandikiyana Chirimuta LA; Pascoe MJ; Lowe S	South Afr J HIV Med	2022	36479423
Viremia and drug resistance among HIV-1 patients on antiretroviral treatment: a cross-sectional study in Soweto, South Africa.	El-Khatib Z; Ekstrom AM; Ledwaba J; Mohapi L; Laher F; Karstaedt A; Charalambous S; Petzold M; Katzenstein D; Morris L	AIDS	2010	20453629
Cuban history of CRF19 recombinant subtype of HIV-1.	Zhukova A; Voznica J; Dávila Felipe M; To TH; Pérez L; Martínez Y; Pintos Y; Méndez M; Gascuel O; Kouri V	PLoS Pathog	2021	34370795
Early selection in Gag by protective HLA alleles contributes to reduced HIV-1 replication capacity that may be largely compensated for in chronic infection.	Brockman MA; Brumme ZL; Brumme CJ; Miura T; Sela J; Rosato PC; Kadie CM; Carlson JM; Markle TJ; Streeck H; Kelleher AD; Markowitz M; Jessen H; Rosenberg E; Altfeld M; Harrigan PR; Heckerman D; Walker BD; Allen TM	J Virol	2010	20810731
Genetic Characteristics of CRF01_AE Among Newly Diagnosed HIV-1-Infected 16- to 25-Year Olds in 3 Geographic Regions of Guangxi, China.	Zhang J; Shen ZY; Li Z; Liang SJ; He C; Liang FX; Feng Y; Li JJ; Ruan YH; Zhou YJ; Shao YM; Xing H; Liao LJ	Medicine (Baltimore)	2015	26020400
HIV-1 Circulating Recombinant Forms (CRFs) and Unique Recombinant Forms (URFs) in Israel, 2010-2018.	Wagner T; Zuckerman NS; Wax M; Shirazi R; Gozlan Y; Girshengorn S; Marom R; Mendelson E; Turner D; Mor O	Viruses	2022	36146776
Treatment failure and drug resistance in HIV-positive patients on tenofovir-based first-line antiretroviral therapy in western Kenya.	Brooks K; Diero L; DeLong A; Balamane M; Reitsma M; Kemboi E; Orido M; Emonyi W; Coetzer M; Hogan J; Kantor R	J Int AIDS Soc	2016	27231099
Pharmacokinetic Data of Dolutegravir in Second-line Treatment of Children With Human Immunodeficiency Virus: Results From the CHAPAS4 Trial.	Bevers LAH; Waalewijn H; Szubert AJ; Chabala C; Bwakura-Dangarembizi M; Makumbi S; Nangiya J; Mumbiro V; Mulenga V; Musiime V; Burger DM; Gibb DM; Colbers A	Clin Infect Dis	2023	37280040
Limited increase in primary HIV-1C drug resistance mutations in treatment naïve individuals in Ethiopia.	Huruy K; Maier M; Mulu A; Liebert UG	J Med Virol	2015	25649964
Tolerability of bictegravir/tenofovir alafenamide/emtricitabine versus dolutegravir/lamivudine as maintenance therapy in a real-life setting.	Rocabert A; Borjabad B; Berrocal L; Blanch J; Inciarte A; Chivite I; Gonzalez-Cordon A; Torres B; Ambrosioni J; Martinez-Rebollar M; Laguno M; De La Mora L; Foncillas A; Sempere A; Rodriguez A; Solbes E; Llobet R; Miro JM; Mallolas J; Blanco JL; De Lazzari E; Martinez E	J Antimicrob Chemother	2023	37875023
Antiviral characteristics of GSK1265744, an HIV integrase inhibitor dosed orally or by long-acting injection.	Yoshinaga T; Kobayashi M; Seki T; Miki S; Wakasa-Morimoto C; Suyama-Kagitani A; Kawauchi-Miki S; Taishi T; Kawasuji T; Johns BA; Underwood MR; Garvey EP; Sato A; Fujiwara T	Antimicrob Agents Chemother	2015	25367908
Breaking the unbreakable: A paediatric case of dolutegravir resistance from KwaZulu-Natal.	Malinga S; Khan A; Archary M	South Afr J HIV Med	2023	37293603
Comparative HIV-1 Phylogenies Characterized by PR/RT, Pol and Near-Full-Length Genome Sequences.	Topcu C; Georgiou V; Rodosthenous JH; Kostrikis LG	Viruses	2022	36298841
Development of an HIV-1 Subtype Panel in China: Isolation and Characterization of 30 HIV-1 Primary Strains Circulating in China.	Han J; Liu S; Guo W; Bao Z; Wang X; Li L; Liu Y; Zhuang D; Li H; Jia L; Gui T; Sui H; Li T; Li J	PLoS One	2015	26018591
Emerging integrase strand transfer inhibitor drug resistance mutations among children and adults on ART in Tanzania: findings from a national representative HIV drug resistance survey.	Kamori D; Barabona G; Rugemalila J; Maokola W; Masoud SS; Mizinduko M; Sabasaba A; Ruhago G; Sambu V; Mushi J; Mgomella GS; Mcollogi JJ; Msafiri F; Mugusi S; Boniface J; Mutagonda R; Mlunde L; Amani D; Mboya E; Mahiti M; Rwebembera A; Ueno T; Pembe A; Njau P; Mutayoba B; Sunguya B	J Antimicrob Chemother	2023	36680436
Genetic Characterization of a Novel HIV-1 Circulating Recombinant Form (CRF74_01B) Identified among Intravenous Drug Users in Malaysia: Recombination History and Phylogenetic Linkage with Previously Defined Recombinant Lineages.	Cheong HT; Chow WZ; Takebe Y; Chook JB; Chan KG; Al-Darraji HA; Koh C; Kamarulzaman A; Tee KK	PLoS One	2015	26196131
Efficacy and safety of three antiretroviral therapy regimens started in pregnancy up to 50 weeks post partum: a multicentre, open-label, randomised, controlled, phase 3 trial.	Chinula L; Ziemba L; Brummel S; McCarthy K; Coletti A; Krotje C; Johnston B; Knowles K; Moyo S; Stranix-Chibanda L; Hoffman R; Sax PE; Stringer J; Chakhtoura N; Jean-Philippe P; Korutaro V; Cassim H; Fairlie L; Masheto G; Boyce C; Frenkel LM; Amico KR; Purdue L; Shapiro R; Mmbaga BT; Patel F; van Wyk J; Rooney JF; Currier JS; Lockman S; IMPAACT 2010/VESTED Study Team and Investigators	Lancet HIV	2023	37167996
Geographic and temporal trends in the molecular epidemiology and genetic mechanisms of transmitted HIV-1 drug resistance: an individual-patient- and sequence-level meta-analysis.	Rhee SY; Blanco JL; Jordan MR; Taylor J; Lemey P; Varghese V; Hamers RL; Bertagnolio S; Rinke de Wit TF; Aghokeng AF; Albert J; Avi R; Avila-Rios S; Bessong PO; Brooks JI; Boucher CA; Brumme ZL; Busch MP; Bussmann H; Chaix ML; Chin BS; D'Aquin TT; De Gascun CF; Derache A; Descamps D; Deshpande AK; Djoko CF; Eshleman SH; Fleury H; Frange P; Fujisaki S; Harrigan PR; Hattori J; Holguin A; Hunt GM; I…	PLoS Med	2015	25849352
Molecular Epidemiology of HIV-1 Virus in Puerto Rico: Novel Cases of HIV-1 Subtype C, D, and CRF-24BG.	López P; De Jesús O; Yamamura Y; Rodríguez N; Arias A; Sánchez R; Rodríguez Y; Tamayo-Agrait V; Cuevas W; Rivera-Amill V	AIDS Res Hum Retroviruses	2018	29658302
Dolutegravir/Lamivudine versus Tenofovir Alafenamide/Emtricitabine/Bictegravir as a Switch Strategy in a Real-Life Cohort of Virogically Suppressed People Living with HIV.	De Socio GV; Tordi S; Altobelli D; Gidari A; Zoffoli A; Francisci D	J Clin Med	2023	38137828
HIV-1 prevalence and subtype/recombinant distribution among travelers entering China from Vietnam at the HeKou port in the Yunnan province, China, between 2003 and 2012.	Wang Y; Liang Y; Feng Y; Wang B; Li Y; Wu Z; Zhang J; Baloch Z; Zhang AM; Liu L; Qin W; Xia X	J Med Virol	2015	25865741
Efficacies of Cabotegravir and Bictegravir against drug-resistant HIV-1 integrase mutants.	Smith SJ; Zhao XZ; Burke TR; Hughes SH	Retrovirology	2018	29769116
Viral Genetic Diversity and Polymorphisms in a Cohort of HIV-1-Infected Patients Eligible for Initiation of Antiretroviral Therapy in Abuja, Nigeria.	Diallo K; Zheng DP; Rottinghaus EK; Bassey O; Yang C	AIDS Res Hum Retroviruses	2015	25582324
Patients infected with HIV type 1 subtype CRF01_AE and failing first-line nevirapine- and efavirenz-based regimens demonstrate considerable cross-resistance to etravirine.	Manosuthi W; Butler DM; Chantratita W; Sukasem C; Richman DD; Smith DM	AIDS Res Hum Retroviruses	2010	20507208
HIV-1 Diversity and Drug Resistance in Treatment-Naïve Children and Adolescents from Rio de Janeiro, Brazil.	de Azevedo SSD; Delatorre E; Gaido CM; Silva-de-Jesus C; Guimarães ML; Couto-Fernandez JC; Morgado MG	Viruses	2022	36016383
In vitro selection of HIV-1 CRF08_BC variants resistant to reverse transcriptase inhibitors.	Wu H; Zhang XM; Zhang HJ; Zhang Q; Chen Z; Huang JD; Lee SS; Zheng BJ	AIDS Res Hum Retroviruses	2015	25482475
Pre-treatment drug resistance and HIV-1 subtypes in infants from Argentina with and without exposure to antiretroviral drugs for prevention of mother-to-child transmission.	Aulicino PC; Zapiola I; Kademian S; Valle MM; Fernandez Giuliano S; Toro R; Barbas G; Cañizal AM; Mayon P; Golemba MD; Ortiz de Zarate M; Corazza MS; Cudola A; Mecikovsky D; Bologna R; Mangano A; Sen L	J Antimicrob Chemother	2019	30517632
HIV-2 Drug Resistance Genotyping from Dried Blood Spots.	Raugi DN; Nixon RS; Leong S; Faye K; Diatta JP; Sall F; Smith RA; Sall EI; Malomar JJ; Seydi M; Gottlieb GS	J Clin Microbiol	2020	33055182
Minority resistant variants are also present in HIV-2-infected antiretroviral-naive patients.	Storto A; Visseaux B; Bertine M; Le Hingrat Q; Collin G; Damond F; Khuong MA; Blum L; Tubiana R; Karmochkine M; Cazanave C; Matheron S; Descamps D; Charpentier C; ANRS HIV-2 CO5 Cohort	J Antimicrob Chemother	2018	29415189
Three-year efficacy of switching to dolutegravir plus lamivudine: A real-world study.	Palmier E; De Miguel R; Montejano R; Busca C; Micán R; Ramos L; Cadiñanos J; Serrano L; Bernardino JI; Pérez-Valero I; Valencia E; Arribas JR; Montes ML; González-García J; Martín-Carbonero L	HIV Med	2023	37194419
Subtype-Specific Differences in Gag-Protease-Driven Replication Capacity Are Consistent with Intersubtype Differences in HIV-1 Disease Progression.	Kiguoya MW; Mann JK; Chopera D; Gounder K; Lee GQ; Hunt PW; Martin JN; Ball TB; Kimani J; Brumme ZL; Brockman MA; Ndung'u T	J Virol	2017	28424286
Antiretroviral Drug Resistance in HIV Sequences From People Who Inject Drugs and Men Who Have Sex With Men Across 21 Cities in India.	Clipman SJ; Solomon SS; Srikrishnan AK; McFall AM; Gomathi S; Saravanan S; Anand S; Vasudevan CK; Kumar MS; Celentano DD; Mehta SH; Lucas GM	Open Forum Infect Dis	2022	36225747
Dolutegravir in HIV-2-Infected Patients With Resistant Virus to First-line Integrase Inhibitors From the French Named Patient Program.	Descamps D; Peytavin G; Visseaux B; Tubiana R; Damond F; Campa P; Charpentier C; Khuong-Josses MA; Duvivier C; Karmochkine M; Lukiana T; Matheron S	Clin Infect Dis	2015	25690598
Low-frequency HIV-1 drug resistance mutations in antiretroviral naïve individuals in Botswana.	Maruapula D; Seatla KK; Morerinyane O; Molebatsi K; Giandhari J; de Oliveira T; Musonda RM; Leteane M; Mpoloka SW; Rowley CF; Moyo S; Gaseitsiwe S	Medicine (Baltimore)	2022	35838991
Factors associated with HIV-1 resistance to integrase strand transfer inhibitors in Spain: Implications for dolutegravir-containing regimens.	Gil H; Delgado E; Benito S; Moreno-Lorenzo M; Thomson MM; Spanish Group for the Study of Antiretroviral Drug Resistance	Front Microbiol	2022	36578581
HIV-1 subtypes and drug resistance mutations among female sex workers varied in different cities and regions of the Democratic Republic of Congo.	Kwon EH; Musema GMA; Boelter J; Townsend S; Tshala-Katumbay D; Kayembe PK; West J; Wood C	PLoS One	2020	32045455
Characterization of HIV drug resistance mutations among patients failing first-line antiretroviral therapy from a tertiary referral center in Lusaka, Zambia.	Seu L; Mulenga LB; Siwingwa M; Sikazwe I; Lambwe N; Guffey MB; Chi BH	J Med Virol	2015	25754408
Drug Resistance to HIV-1 Integrase Inhibitors Among Treatment-Naive Patients in Beijing, China.	Yu F; Li Q; Wang L; Zhao H; Wu H; Yang S; Tang Y; Xiao J; Zhang F	Pharmgenomics Pers Med	2022	35300056
Prevalence of drug resistance and importance of viral load measurements in Honduran HIV-infected patients failing antiretroviral treatment.	Murillo W; de Rivera IL; Parham L; Jovel E; Palou E; Karlsson AC; Albert J	HIV Med	2010	19686436
Independent epidemic patterns of HIV-1 CRF01_AE lineages driven by mobile population in Shenzhen, an immigrant city of China.	An M; Zheng C; Li H; Chen L; Yang Z; Gan Y; Han X; Zhao J; Shang H	Virus Evol	2021	35299786
Viral rebound and emergence of drug resistance in the absence of viral load testing: a randomized comparison between zidovudine-lamivudine plus Nevirapine and zidovudine-lamivudine plus Abacavir.	Ndembi N; Goodall RL; Dunn DT; McCormick A; Burke A; Lyagoba F; Munderi P; Katundu P; Kityo C; Robertson V; Yirrell DL; Walker AS; Gibb DM; Gilks CF; Kaleebu P; Pillay D; Development of Antiretroviral Treatment in Africa Virology Group and Trial Team	J Infect Dis	2010	19938977
Mechanism of Darunavir (DRV)'s High Genetic Barrier to HIV-1 Resistance: A Key V32I Substitution in Protease Rarely Occurs, but Once It Occurs, It Predisposes HIV-1 To Develop DRV Resistance.	Aoki M; Das D; Hayashi H; Aoki-Ogata H; Takamatsu Y; Ghosh AK; Mitsuya H	mBio	2018	29511083
HIV-1 resistance against dolutegravir fluctuates rapidly alongside erratic treatment adherence: a case report.	van Kampen JJA; Pham HT; Yoo S; Overmars RJ; Lungu C; Mahmud R; Schurink CAM; van Boheemen S; Gruters RA; Fraaij PLA; Burger DM; Voermans JJC; Rokx C; van de Vijver DAMC; Mesplède T	J Glob Antimicrob Resist	2022	36347497
Integrase Inhibitor Resistance Mechanisms and Structural Characteristics in Antiretroviral Therapy-Experienced, Integrase Inhibitor-Naive Adults with HIV-1 Infection Treated with Dolutegravir plus Two Nucleoside Reverse Transcriptase Inhibitors in the DAWNING Study.	Underwood M; Horton J; Nangle K; Hopking J; Smith K; Aboud M; Wynne B; Sievers J; Stewart EL; Wang R	Antimicrob Agents Chemother	2022	34694877
Prevalence and Evolution of Transmitted Human Immunodeficiency Virus Drug Resistance in Belgium Between 2013 and 2019.	Mortier V; Debaisieux L; Dessilly G; Stoffels K; Vaira D; Vancutsem E; Van Laethem K; Vanroye F; Verhofstede C	Open Forum Infect Dis	2022	35794938
Emergence as an outbreak of the HIV-1 CRF19_cpx variant in treatment-naïve patients in southern Spain.	González-Domenech CM; Viciana I; Delaye L; Mayorga ML; Palacios R; de la Torre J; Jarilla F; Castaño M; Del Arco A; Clavijo E; Santos J	PLoS One	2018	29309418
Ongoing HIV-1 evolution and reservoir reseeding in two elite controllers with genetically diverse peripheral proviral quasispecies.	de Azevedo SSD; Côrtes FH; Villela LM; Hoagland B; Grinsztejn B; Veloso VG; Morgado MG; Bello G	Mem Inst Oswaldo Cruz	2023	37283423
Novel secondary mutations C56S and G149A confer resistance to HIV-1 integrase strand transfer inhibitors.	Yoshinaga T; Seki T; Miki S; Miyamoto T; Suyama-Kagitani A; Kawauchi-Miki S; Kobayashi M; Sato A; Stewart E; Underwood M; Fujiwara T	Antiviral Res	2018	29410019
Epidemiological and molecular characteristics of HIV infection among money boys and general men who have sex with men in Shanghai, China.	Yan H; Ding Y; Wong FY; Ning Z; Zheng T; Nehl EJ; He N	Infect Genet Evol	2015	25653132
Phenotypic susceptibility to bevirimat in isolates from HIV-1-infected patients without prior exposure to bevirimat.	Margot NA; Gibbs CS; Miller MD	Antimicrob Agents Chemother	2010	20308382
Low HIV-1 transmitted drug resistance in Bulgaria against a background of high clade diversity.	Alexiev I; Shankar A; Wensing AM; Beshkov D; Elenkov I; Stoycheva M; Nikolova D; Nikolova M; Switzer WM	J Antimicrob Chemother	2015	25652746
Doravirine and Islatravir Have Complementary Resistance Profiles and Create a Combination with a High Barrier to Resistance.	Lai MT; Feng M; Xu M; Ngo W; Diamond TL; Hwang C; Grobler JA; Hazuda DJ; Asante-Appiah E	Antimicrob Agents Chemother	2022	35491829
Structural Features and Genetic Diversity in Gag Gene of Rare HIV-1 Subtypes from the Democratic Republic of Congo.	Godwe C; Vidal N; Muwonga J; Butel C; Serrano L; Edidi S; Ahuka-Mundeke S; Koro Koro F; Etoa X; Tongo M; Peeters M; Ayouba A	AIDS Res Hum Retroviruses	2024	37335033
Dolutegravir resistance mutation R263K cannot coexist in combination with many classical integrase inhibitor resistance substitutions.	Anstett K; Mesplede T; Oliveira M; Cutillas V; Wainberg MA	J Virol	2015	25653436
Level of viral load and antiretroviral resistance after 6 months of non-nucleoside reverse transcriptase inhibitor first-line treatment in HIV-1-infected children in Mali.	Germanaud D; Derache A; Traore M; Madec Y; Toure S; Dicko F; Coulibaly H; Traore M; Sylla M; Calvez V; Marcelin AG	J Antimicrob Chemother	2010	19933171
A large population sample of African HIV genomes from the 1980s reveals a reduction in subtype D over time associated with propensity for CXCR4 tropism.	Grant HE; Roy S; Williams R; Tutill H; Ferns B; Cane PA; Carswell JW; Ssemwanga D; Kaleebu P; Breuer J; Leigh Brown AJ	Retrovirology	2022	36514107
Hot spots of integrase genotypic changes leading to HIV-2 resistance to raltegravir.	Charpentier C; Roquebert B; Delelis O; Larrouy L; Matheron S; Tubiana R; Karmochkine M; Duval X; Chêne G; Storto A; Collin G; Bénard A; Damond F; Mouscadet JF; Brun-Vézinet F; Descamps D; French ANRS HIV-2 Cohort (ANRS CO 05 VIH-2)	Antimicrob Agents Chemother	2011	21189351
Distinct circulating recombinant HIV-1 strains among injecting drug users and sex workers in Afghanistan.	Sanders-Buell E; Bose M; Nasir A; Todd CS; Stanekzai MR; Tovanabutra S; Scott PT; Strathdee SA; Tjaden J; Michael NL; McCutchan FE	AIDS Res Hum Retroviruses	2010	20438383
Surveillance of HIV-1 pol transmitted drug resistance in acutely and recently infected antiretroviral drug-naïve persons in rural western Kenya.	Onywera H; Maman D; Inzaule S; Auma E; Were K; Fredrick H; Owiti P; Opollo V; Etard JF; Mukui I; Kim AA; Zeh C	PLoS One	2017	28178281
HIV-1 transmitted drug resistance and genetic diversity among patients from Piauí State, Northeast Brazil.	Moura ME; da Guarda Reis MN; Lima YA; Eulálio KD; Cardoso LP; Stefani MM	J Med Virol	2015	25649362
Longitudinal trends of recent HIV-1 infections in Slovenia (1986-2012) determined using an incidence algorithm.	Lunar MM; Matković I; Tomažič J; Vovko TD; Pečavar B; Poljak M	J Med Virol	2015	25970253
HIV-1 diversity in an antiretroviral treatment naïve cohort from Bushbuckridge, Mpumalanga Province, South Africa.	Msimanga PW; Vardas E; Engelbrecht S	Virol J	2015	25889106
High rates of baseline antiretroviral resistance among HIV-infected pregnant women in an HIV referral centre in Rio de Janeiro, Brazil.	de Lourdes Teixeira M; Nafea S; Yeganeh N; Santos E; Gouvea MI; Joao E; Ceci L; Bressan C; Cruz ML; Sidi LC; Nielsen-Saines K	Int J STD AIDS	2015	25504831
High prevalence of pre-treatment HIV drug resistance in Papua New Guinea: findings from the first nationally representative pre-treatment HIV drug resistance study.	Gare J; Toto B; Pokeya P; Le LV; Dala N; Lote N; John B; Yamba A; Soli K; DeVos J; Paulin H; Wagar N; Zheng DP; Nishijima T; Boas P; Kelly-Hanku A; Gurung A	BMC Infect Dis	2022	35305571
HIV transmission clusters among injecting drug users in Romania.	Temereanca A; Oprea C; Wertheim JO; Ianache I; Ceausu E; Cernescu C; Mehta SR; Ruta S	Rom Biotechnol Lett	2017	29213206
Prevalence of HIV-1 drug resistance in Eastern European and Central Asian countries.	Kirichenko A; Kireev D; Lopatukhin A; Murzakova A; Lapovok I; Saleeva D; Ladnaya N; Gadirova A; Ibrahimova S; Safarova A; Grigoryan T; Petrosyan A; Sarhatyan T; Gasich E; Bunas A; Glinskaya I; Yurovsky P; Nurov R; Soliev A; Ismatova L; Musabaev E; Kazakova E; Rakhimova V; Pokrovsky V	PLoS One	2022	35061671
Genetic and epidemiologic characterization of HIV-1 infection In Liaoning Province, China.	Han X; Dai D; Zhao B; Liu J; Ding H; Zhang M; Hu Q; Lu C; Goldin M; Takebe Y; Zhang L; Shang H	J Acquir Immune Defic Syndr	2010	20104106
Impact of Treatment Adherence on Efficacy of Dolutegravir + Lamivudine and Dolutegravir + Tenofovir Disoproxil Fumarate/Emtricitabine: Pooled Week 144 Analysis of the GEMINI-1 and GEMINI-2 Clinical Studies.	Fernvik E; Sierra Madero J; Espinosa N; Gulminetti R; Hagins D; Tsai HC; Man C; Sievers J; Grove R; Zolopa A; Wynne B; van Wyk J; Ait-Khaled M	J Acquir Immune Defic Syndr	2023	37850985
Virological Failure in HIV to Triple Therapy With Dolutegravir-Based Firstline Treatment: Rare but Possible.	Pena MJ; Chueca N; D'Avolio A; Zarzalejos JM; Garcia F	Open Forum Infect Dis	2019	30631792
Dolutegravir Resistance in Malawi's National HIV Treatment Program.	van Oosterhout JJ; Chipungu C; Nkhoma L; Kanise H; Hosseinipour MC; Sagno JB; Simon K; Cox C; Hoffman R; Steegen K; Matola BW; Phiri S; Jahn A; Nyirenda R; Heller T	Open Forum Infect Dis	2022	35493118
Predicted effects of the introduction of long-acting injectable cabotegravir pre-exposure prophylaxis in sub-Saharan Africa: a modelling study.	Smith J; Bansi-Matharu L; Cambiano V; Dimitrov D; Bershteyn A; van de Vijver D; Kripke K; Revill P; Boily MC; Meyer-Rath G; Taramusi I; Lundgren JD; van Oosterhout JJ; Kuritzkes D; Schaefer R; Siedner MJ; Schapiro J; Delany-Moretlwe S; Landovitz RJ; Flexner C; Jordan M; Venter F; Radebe M; Ripin D; Jenkins S; Resar D; Amole C; Shahmanesh M; Gupta RK; Raizes E; Johnson C; Inzaule S; Shafer R; Warr…	Lancet HIV	2023	36642087
Human Immunodeficiency Virus (HIV) Drug Resistance, Phylogenetic Analysis, and Superinfection Among Men Who Have Sex with Men and Transgender Women in Sub-Saharan Africa: HIV Prevention Trials Network (HPTN) 075 Study.	Sivay MV; Palumbo PJ; Zhang Y; Cummings V; Guo X; Hamilton EL; McKinstry L; Ogendo A; Kayange N; Panchia R; Dominguez K; Chen YQ; Sandfort TGM; Eshleman SH	Clin Infect Dis	2021	32761071
Transmitted drug resistance in recently infected HIV-positive Individuals from four urban locations across Asia (2007-2010) - TASER-S.	Jiamsakul A; Sirivichayakul S; Ditangco R; Wong KH; Li PC; Praparattanapan J; Phanuphak P; Segubre-Mercado E; Yam WC; Sirisanthana T; Singtoroj T; Law M; TREAT Asia Studies to Evaluate Resistance – Surveillance Study (TASER-S)	AIDS Res Ther	2015	25685169
Retrospective study of HIV drug resistance in Mexican children with vertically transmitted infection.	de Jesús Herrera-Castillo C; Maldonado-Rodríguez A; Rojas-Montes O; Cevallos AM; Vázquez-Rosales JG; Lira R	World J Pediatr	2022	35508579
Virological Failure After Switch to Long-Acting Cabotegravir and Rilpivirine Injectable Therapy: An In-depth Analysis.	van Welzen BJ; Van Lelyveld SFL; Ter Beest G; Gisolf JH; Geerlings SE; Prins JM; Van Twillert G; Van Nieuwkoop C; Van der Valk M; Burger D; Wensing AMJ	Clin Infect Dis	2024	38207125
Homogenous HIV-1 subtype B from the Brazilian Amazon with infrequent diverse BF1 recombinants, subtypes F1 and C among blood donors.	Crispim MAE; Reis MNDG; Abrahim C; Kiesslich D; Fraiji N; Bello G; Stefani MMA	PLoS One	2019	31498798
Evaluation of the genotypic prediction of HIV-1 coreceptor use versus a phenotypic assay and correlation with the virological response to maraviroc: the ANRS GenoTropism study.	Recordon-Pinson P; Soulié C; Flandre P; Descamps D; Lazrek M; Charpentier C; Montes B; Trabaud MA; Cottalorda J; Schneider V; Morand-Joubert L; Tamalet C; Desbois D; Macé M; Ferré V; Vabret A; Ruffault A; Pallier C; Raymond S; Izopet J; Reynes J; Marcelin AG; Masquelier B; ANRS AC11 Resistance Study Group	Antimicrob Agents Chemother	2010	20530226
Molecular Epidemiology of HIV-1 in Ghana: Subtype Distribution, Drug Resistance and Coreceptor Usage.	Appah A; Beelen CJ; Kirkby D; Dong W; Shahid A; Foley B; Mensah M; Ganu V; Puplampu P; Amoah LE; Nii-Trebi NI; Brumme CJ; Brumme ZL	Viruses	2022	36680168
HIV RNA Screening Reduces Integrase Strand Transfer Inhibitor Resistance Risk in Persons Receiving Long-Acting Cabotegravir for HIV Prevention.	Eshleman SH; Fogel JM; Halvas EK; Piwowar-Manning E; Marzinke MA; Kofron R; Wang Z; Mellors J; McCauley M; Rinehart AR; St Clair M; Adeyeye A; Hinojosa JC; Cabello R; Middelkoop K; Hanscom B; Cohen MS; Grinsztejn B; Landovitz RJ; HPTN 083 Study Team	J Infect Dis	2022	36240386
Emergence of Resistance in HIV-1 Integrase with Dolutegravir Treatment in a Pediatric Population from the IMPAACT P1093 Study.	Vavro C; Ruel T; Wiznia A; Montañez N; Nangle K; Horton J; Buchanan AM; Stewart EL; Palumbo P	Antimicrob Agents Chemother	2022	34694878
Low-level viraemia despite emergence of dolutegravir-resistant variants.	Botha JC; Steegen K; Edoo M; Nel J; van Zyl GU	South Afr J HIV Med	2022	36299554
Human immunodeficiency virus type 1 ((HIV-1) subtypes in the northwest region, Cameroon.	Abongwa LE; Nyamache AK; Torimiro JN; Okemo P; Charles F	Virol J	2019	31416460
HIV-1 reverse transcriptase connection domain mutations: dynamics of emergence and implications for success of combination antiretroviral therapy.	von Wyl V; Ehteshami M; Demeter LM; Bürgisser P; Nijhuis M; Symons J; Yerly S; Böni J; Klimkait T; Schuurman R; Ledergerber B; Götte M; Günthard HF; Swiss HIV Cohort Study	Clin Infect Dis	2010	20666602
Emergence of clusters of CRF02_AG and B human immunodeficiency viral strains among men having sex with men exhibiting HIV primary infection in southeastern France.	Tamalet C; Ravaux I; Moreau J; Brégigeon S; Tourres C; Richet H; Abat C; Colson P	J Med Virol	2015	25873310
Molecular transmission networks and pre-treatment drug resistance among individuals with acute HIV-1 infection in Baoding, China.	Shi P; Chen Z; Meng J; Su M; Yang X; Fan W; Shi H; Gao Y; Lu X	PLoS One	2021	34855860
CRF19_cpx is an Evolutionary fit HIV-1 Variant Strongly Associated With Rapid Progression to AIDS in Cuba.	Kouri V; Khouri R; Alemán Y; Abrahantes Y; Vercauteren J; Pineda-Peña AC; Theys K; Megens S; Moutschen M; Pfeifer N; Van Weyenbergh J; Pérez AB; Pérez J; Pérez L; Van Laethem K; Vandamme AM	EBioMedicine	2015	26137563
Dolutegravir in the long term in children and adolescents: frequent virological failure but rare acquired genotypic resistance.	Frange P; Blanche S; Veber F; Avettand-Fenoel V	HIV Med	2021	34369051
Primary mutations selected in vitro with raltegravir confer large fold changes in susceptibility to first-generation integrase inhibitors, but minor fold changes to inhibitors with second-generation resistance profiles.	Goethals O; Vos A; Van Ginderen M; Geluykens P; Smits V; Schols D; Hertogs K; Clayton R	Virology	2010	20421122
Antiviral Activity of Bictegravir (GS-9883), a Novel Potent HIV-1 Integrase Strand Transfer Inhibitor with an Improved Resistance Profile.	Tsiang M; Jones GS; Goldsmith J; Mulato A; Hansen D; Kan E; Tsai L; Bam RA; Stepan G; Stray KM; Niedziela-Majka A; Yant SR; Yu H; Kukolj G; Cihlar T; Lazerwith SE; White KL; Jin H	Antimicrob Agents Chemother	2016	27645238
Genetic impact of vaccination on breakthrough HIV-1 sequences from the STEP trial.	Rolland M; Tovanabutra S; deCamp AC; Frahm N; Gilbert PB; Sanders-Buell E; Heath L; Magaret CA; Bose M; Bradfield A; O'Sullivan A; Crossler J; Jones T; Nau M; Wong K; Zhao H; Raugi DN; Sorensen S; Stoddard JN; Maust BS; Deng W; Hural J; Dubey S; Michael NL; Shiver J; Corey L; Li F; Self SG; Kim J; Buchbinder S; Casimiro DR; Robertson MN; Duerr A; McElrath MJ; McCutchan FE; Mullins JI	Nat Med	2011	21358627
Proportion of APOBEC3-induced defective HIV DNA after 1 year of dolutegravir + lamivudine simplification in the ANRS 167 LAMIDOL trial.	Mazouz F; Bertine M; Coppée R; Storto A; Katlama C; Landman R; Cabié A; Peytavin G; Raffi F; Yazdanpanah Y; Descamps D; Joly V; Ghosn J; Charpentier C; LAMIDOL Study Group	J Antimicrob Chemother	2023	37930812
Factors Associated With Viral Suppression and Drug Resistance in Children and Adolescents Living With HIV in Care and Treatment Programs in Southern Tanzania.	Khamadi SA; Bahemana E; Dear N; Mavere C; George F; Kapene R; Papianus G; Willoughby W; Chambers J; Ganesan K; Mwakabanje I; Bacha JM; Desai P; Almas S; Coakley PD; Wolfman V; Lee EH; Hickey PW; Livezey J; Agaba PA	J Pediatric Infect Dis Soc	2023	37279560
Infection with the frequently transmitted HIV-1 M41L variant has no influence on selection of tenofovir resistance.	Pingen M; Nijhuis M; Mudrikova T; van Laarhoven A; Langebeek N; Richter C; Boucher CA; Wensing AM	J Antimicrob Chemother	2015	25261422
Characterization of Near Full-Length Transmitted/Founder HIV-1 Subtype D and A/D Recombinant Genomes in a Heterosexual Ugandan Population (2006-2011).	Balinda SN; Kapaata A; Xu R; Salazar MG; Mezzell AT; Qin Q; Herard K; Dilernia D; Kamali A; Ruzagira E; Kibengo FM; Song H; Ochsenbauer C; Salazar-Gonzalez JF; Gilmour J; Hunter E; Yue L; Kaleebu P	Viruses	2022	35215928
HIV-2 integrase variation in integrase inhibitor-naïve adults in Senegal, West Africa.	Gottlieb GS; Smith RA; Dia Badiane NM; Ba S; Hawes SE; Toure M; Starling AK; Traore F; Sall F; Cherne SL; Stern J; Wong KG; Lu P; Kim M; Raugi DN; Lam A; Mullins JI; Kiviat NB; Papa Salif Sow for the UW-Dakar HIV-2 Study Group	PLoS One	2011	21765953
High prevalence of the K65R mutation in HIV-1 subtype C infected patients failing tenofovir-based first-line regimens in South Africa.	Skhosana L; Steegen K; Bronze M; Lukhwareni A; Letsoalo E; Papathanasopoulos MA; Carmona SC; Stevens WS	PLoS One	2015	25659108
HIV-1 protease mutations and protease inhibitor cross-resistance.	Rhee SY; Taylor J; Fessel WJ; Kaufman D; Towner W; Troia P; Ruane P; Hellinger J; Shirvani V; Zolopa A; Shafer RW	Antimicrob Agents Chemother	2010	20660676
HIV-1 Group O Resistance Against Integrase Inhibitors.	Depatureaux A; Mesplède T; Quashie P; Oliveira M; Moisi D; Plantier JC; Brenner B; Wainberg MA	J Acquir Immune Defic Syndr	2015	26017662
Dolutegravir-associated resistance mutations after first-line treatment failure in Brazil.	Diaz RS; Hunter JR; Camargo M; Dias D; Galinskas J; Nassar I; de Lima IB; Caldeira DB; Sucupira MC; Schechter M	BMC Infect Dis	2023	37226112
Characterization of HIV-1 Resistance to Tenofovir Alafenamide In Vitro.	Margot NA; Johnson A; Miller MD; Callebaut C	Antimicrob Agents Chemother	2015	26149983
Effects of raltegravir or elvitegravir resistance signature mutations on the barrier to dolutegravir resistance in vitro.	Seki T; Suyama-Kagitani A; Kawauchi-Miki S; Miki S; Wakasa-Morimoto C; Akihisa E; Nakahara K; Kobayashi M; Underwood MR; Sato A; Fujiwara T; Yoshinaga T	Antimicrob Agents Chemother	2015	25691633
Doravirine responses to HIV-1 viruses bearing mutations to NRTIs and NNRTIs under in vitro selective drug pressure.	Brenner BG; Oliveira M; Ibanescu RI; Routy JP; Thomas R	J Antimicrob Chemother	2023	37303226
Analysis of a local HIV-1 epidemic in portugal highlights established transmission of non-B and non-G subtypes.	Carvalho A; Costa P; Triunfante V; Branca F; Rodrigues F; Santos CL; Correia-Neves M; Saraiva M; Lecour H; Castro AG; Pedrosa J; Osório NS	J Clin Microbiol	2015	25694526
Impact of combinations of clinically observed HIV integrase mutations on phenotypic resistance to integrase strand transfer inhibitors (INSTIs): a molecular study.	Cheung PK; Shahid A; Dong W; Lepik KJ; Montaner JSG; Brockman MA; Brumme ZL; Brumme CJ	J Antimicrob Chemother	2022	35061879
Transmission of HIV-1 drug resistance mutations within partner-pairs: A cross-sectional study of a primary HIV infection cohort.	Stekler JD; Milne R; Payant R; Beck I; Herbeck J; Maust B; Deng W; Tapia K; Holte S; Maenza J; Stevens CE; Mullins JI; Collier AC; Frenkel LM	PLoS Med	2018	29584723
Evaluation of integrase resistance in individuals who failed a regimen containing dolutegravir in French and Italian clinical settings.	Armenia D; Santoro MM; Charpentier C; Bertoli A; Forbici F; Calvez V; Descamps D; Ceccherini-Silberstein F; Marcelin AG; Flandre P	J Antimicrob Chemother	2023	37258034
Combination of V106I and V179D polymorphic mutations in human immunodeficiency virus type 1 reverse transcriptase confers resistance to efavirenz and nevirapine but not etravirine.	Gatanaga H; Ode H; Hachiya A; Hayashida T; Sato H; Oka S	Antimicrob Agents Chemother	2010	20124001
Baseline integrase drug resistance mutations and conserved regions across HIV-1 clades in Cameroon: implications for transition to dolutegravir in resource-limited settings.	Semengue ENJ; Armenia D; Inzaule S; Santoro MM; Dambaya B; Takou D; Teto G; Nka AD; Yagai B; Fabeni L; Chenwi C; Angong Beloumou G; Djupsa Ndjeyep SC; Colizzi V; Perno CF; Ceccherini-Silberstein F; Fokam J	J Antimicrob Chemother	2021	33501504
Demonstration Project of Long-Acting Antiretroviral Therapy in a Diverse Population of People With HIV.	Gandhi M; Hickey M; Imbert E; Grochowski J; Mayorga-Munoz F; Szumowski JD; Oskarsson J; Shiels M; Sauceda J; Salazar J; Dilworth S; Nguyen JQ; Glidden DV; Havlir DV; Christopoulos KA	Ann Intern Med	2023	37399555
A national study of the molecular epidemiology of HIV-1 in Australia 2005-2012.	Castley A; Sawleshwarkar S; Varma R; Herring B; Thapa K; Dwyer D; Chibo D; Nguyen N; Hawke K; Ratcliff R; Garsia R; Kelleher A; Nolan D; Australian Molecular Epidemiology Network-HIV (AMEN-HIV)	PLoS One	2017	28489920
HIV type 1 pol gene diversity and genotypic antiretroviral drug resistance mutations in Malabo, Equatorial Guinea.	Djoko CF; Wolfe ND; Vidal N; Tamoufe U; Montavon C; LeBreton M; Pike BL; Fair J; Mbacham WF; Benito A; Rimoin AW; Saylors K; Mpoudi-Ngole E; Grillo MP; Peeters M	AIDS Res Hum Retroviruses	2010	20718620
HIV-1 Genetic Diversity Among Incident Infections in Mbeya, Tanzania.	Billings E; Sanders-Buell E; Bose M; Kijak GH; Bradfield A; Crossler J; Arroyo MA; Maboko L; Hoffmann O; Geis S; Birx DL; Kim JH; Michael NL; Robb ML; Hoelscher M; Tovanabutra S	AIDS Res Hum Retroviruses	2017	27841669
Natural polymorphism S119R of HIV-1 integrase enhances primary INSTI resistance.	Hachiya A; Ode H; Matsuda M; Kito Y; Shigemi U; Matsuoka K; Imamura J; Yokomaku Y; Iwatani Y; Sugiura W	Antiviral Res	2015	25956162
Characterization of Intact Proviruses in Blood and Lymph Node from HIV-Infected Individuals Undergoing Analytical Treatment Interruption.	Vibholm LK; Lorenzi JCC; Pai JA; Cohen YZ; Oliveira TY; Barton JP; Garcia Noceda M; Lu CL; Ablanedo-Terrazas Y; Del Rio Estrada PM; Reyes-Teran G; Tolstrup M; Denton PW; Damsgaard T; Søgaard OS; Nussenzweig MC	J Virol	2019	30700598
Comparison of Virological Efficacy of DTG/ABC/3TG and B/F/TAF Regimens and Discontinuation Patterns in Persons Living with Advanced HIV in the Era of Rapid ART: A Retrospective Multicenter Cohort Study.	Lee CY; Lee CH; Tang HJ; Tsai HC; Yang CH; Lin YP; Wang SF; Lu PL	Infect Dis Ther	2023	36520332
Detection of HIV-1 Transmission Clusters from Dried Blood Spots within a Universal Test-and-Treat Trial in East Africa.	Pujol-Hodge E; Salazar-Gonzalez JF; Ssemwanga D; Charlebois ED; Ayieko J; Grant HE; Liegler T; Atkins KE; Kaleebu P; Kamya MR; Petersen M; Havlir DV; Leigh Brown AJ	Viruses	2022	36016295
HIV drug resistance in persons who inject drugs enrolled in an HIV prevention trial in Indonesia, Ukraine, and Vietnam: HPTN 074.	Palumbo PJ; Zhang Y; Fogel JM; Guo X; Clarke W; Breaud A; Richardson P; Piwowar-Manning E; Hart S; Hamilton EL; Hoa NTK; Liulchuk M; Anandari L; Ha TV; Dumchev K; Djoerban Z; Hoffman I; Hanscom B; Miller WC; Eshleman SH	PLoS One	2019	31600343
Primary resistance to antiretroviral drugs of HIV strains in Chad: a retrospective investigation by analysis of frozen dried blood spot samples.	Keita A; Djimera N; Djarma O; N'Guyen Y; Bourlet T; Andreoletti L	Eur J Clin Microbiol Infect Dis	2021	33237460
Spectrum of Atazanavir-Selected Protease Inhibitor-Resistance Mutations.	Rhee SY; Boehm M; Tarasova O; Di Teodoro G; Abecasis AB; Sönnerborg A; Bailey AJ; Kireev D; Zazzi M; The EuResist Network Study Group; Shafer RW	Pathogens	2022	35631067
Bictegravir/Emtricitabine/Tenofovir Alafenamide Versus Dolutegravir Plus Lamivudine for Switch Therapy in Patients with HIV-1 Infection: A Real-World Cohort Study.	Gan L; Xie X; Fu Y; Yang X; Ma S; Kong L; Song C; Song Y; Ren T; Long H	Infect Dis Ther	2023	37845566
Antiretroviral drug use and HIV drug resistance in female sex workers in Tanzania and the Dominican Republic.	Grant-McAuley W; Fogel JM; Galai N; Clarke W; Breaud A; Marzinke MA; Mbwambo J; Likindikoki S; Aboud S; Donastorg Y; Perez M; Barrington C; Davis W; Kerrigan D; Eshleman SH	PLoS One	2020	33119663
Molecular Epidemiology and Transmission Dynamics of the HIV-1 Epidemic in Ethiopia: Epidemic Decline Coincided With Behavioral Interventions Before ART Scale-Up.	Arimide DA; Esquivel-Gómez LR; Kebede Y; Sasinovich S; Balcha T; Björkman P; Kühnert D; Medstrand P	Front Microbiol	2022	35283836
HIV drug resistance mutations in proviral DNA from a community treatment program.	Derache A; Shin HS; Balamane M; White E; Israelski D; Klausner JD; Freeman AH; Katzenstein D	PLoS One	2015	25635815
Evolution of integrase resistance during failure of integrase inhibitor-based antiretroviral therapy.	Hatano H; Lampiris H; Fransen S; Gupta S; Huang W; Hoh R; Martin JN; Lalezari J; Bangsberg D; Petropoulos C; Deeks SG	J Acquir Immune Defic Syndr	2010	20300008
Real world use of dolutegravir two drug regimens.	Bowman C; Ambrose A; Kanitkar T; Flores K; Simoes P; Hart J; Hunter A; Akodu J; Barber TJ	AIDS	2023	36728219
Subtype-specific differences in Gag-protease replication capacity of HIV-1 isolates from East and West Africa.	Farinre O; Gounder K; Reddy T; Tongo M; Hare J; Chaplin B; Gilmour J; Kanki P; Mann JK; Ndung'u T	Retrovirology	2021	33952315
CRF07_BC Strain Dominates the HIV-1 Epidemic in Injection Drug Users in Liangshan Prefecture of Sichuan, China.	Li L; Wei D; Hsu WL; Li T; Gui T; Wood C; Liu Y; Li H; Bao Z; Liu S; Wang X; Li J	AIDS Res Hum Retroviruses	2015	25560398
Recent increased identification and transmission of HIV-1 unique recombinant forms in Sweden.	Neogi U; Siddik AB; Kalaghatgi P; Gisslén M; Bratt G; Marrone G; Sönnerborg A	Sci Rep	2017	28744024
Lersivirine, a nonnucleoside reverse transcriptase inhibitor with activity against drug-resistant human immunodeficiency virus type 1.	Corbau R; Mori J; Phillips C; Fishburn L; Martin A; Mowbray C; Panton W; Smith-Burchnell C; Thornberry A; Ringrose H; Knöchel T; Irving S; Westby M; Wood A; Perros M	Antimicrob Agents Chemother	2010	20660667
Characterization and frequency of a newly identified HIV-1 BF1 intersubtype circulating recombinant form in São Paulo, Brazil.	Sanabani SS; Pastena ER; Neto WK; Martinez VP; Sabino EC	Virol J	2010	20398371
Transmitted Drug Resistance Mutations in Antiretroviral-Naïve Injection Drug Users with Chronic HIV-1 Infection in Iran.	Memarnejadian A; Menbari S; Mansouri SA; Sadeghi L; Vahabpour R; Aghasadeghi MR; Mostafavi E; Abdi M	PLoS One	2015	25962088
Molecular diversity and polymerase gene genotypes of HIV-1 among treatment-naïve Cameroonian subjects with advanced disease.	Soares EA; Makamche MF; Siqueira JD; Lumngwena E; Mbuagbaw J; Kaptue L; Asonganyi T; Seuánez HN; Soares MA; Alemnji G	J Clin Virol	2010	20483657
Pretreatment HIV Drug Resistance and Virologic Outcomes to First-Line Antiretroviral Therapy in Peru.	Soria J; Mugruza R; Levine M; León SR; Arévalo J; Ticona E; Beck IA; Frenkel LM	AIDS Res Hum Retroviruses	2019	30560685
G118R and F121Y mutations identified in patients failing raltegravir treatment confer dolutegravir resistance.	Munir S; Thierry E; Malet I; Subra F; Calvez V; Marcelin AG; Deprez E; Delelis O	J Antimicrob Chemother	2015	25414202
Identification and genetic characterization of a novel CRF22_01A1 recombinant form of HIV type 1 in Cameroon.	Zhao J; Tang S; Ragupathy V; Carr JK; Wolfe ND; Awazi B; Hewlett I	AIDS Res Hum Retroviruses	2010	20812894
Bictegravir/Emtricitabine/Tenofovir Alafenamide in a Multicentre Cohort: Real-Life Experience From Spain.	Torralba M; Rodríguez G; González Gasca FJ; Cuadra F; Barberá J; Geijo P; Silva A; García MI; Ostaiza MA; García Pérez AM; Arroyo E; Larrubia JR; Gutiérrez A; Porras ML; Calvo Sánchez H; Peña-Asensio J; Arias JG; Mendoza I	Ann Pharmacother	2024	37131300
Long-Acting Cabotegravir/Rilpivirine Concentrations in Combination With Intravenous Rifampin: A Case Report.	Sunagawa SW; Havens JP; Podany A; Walker B; Scarsi KK; Bares SH	Open Forum Infect Dis	2023	38143853
TMC278, a next-generation nonnucleoside reverse transcriptase inhibitor (NNRTI), active against wild-type and NNRTI-resistant HIV-1.	Azijn H; Tirry I; Vingerhoets J; de Béthune MP; Kraus G; Boven K; Jochmans D; Van Craenenbroeck E; Picchio G; Rimsky LT	Antimicrob Agents Chemother	2010	19933797
HIV-1 drug resistance mutations in children after failure of first-line nonnucleoside reverse transcriptase inhibitor-based antiretroviral therapy.	Puthanakit T; Jourdain G; Hongsiriwon S; Suntarattiwong P; Chokephaibulkit K; Sirisanthana V; Kosalaraksa P; Petdachai W; Hansudewechakul R; Siangphoe U; Suwanlerk T; Ananworanich J; HIV-NAT 086Study Team	HIV Med	2010	20345882
Analysis of HIV-1 BF pr/rt recombinant strains from Rio de Janeiro/Brazil reveals multiple unrelated mosaic structures.	Guimarães ML; Couto-Fernandez JC; Eyer-Silva Wde A; Teixeira SL; Chequer-Fernandez SL; Morgado MG	Infect Genet Evol	2010	20621204
Memory CD4 + T-Cells Expressing HLA-DR Contribute to HIV Persistence During Prolonged Antiretroviral Therapy.	Lee E; Bacchetti P; Milush J; Shao W; Boritz E; Douek D; Fromentin R; Liegler T; Hoh R; Deeks SG; Hecht FM; Chomont N; Palmer S	Front Microbiol	2019	31611857
Spectrum of Activity of Raltegravir and Dolutegravir Against Novel Treatment-Associated Mutations in HIV-2 Integrase: A Phenotypic Analysis Using an Expanded Panel of Site-Directed Mutants.	Smith RA; Wu VH; Song J; Raugi DN; Diallo Mbaye K; Seydi M; Gottlieb GS	J Infect Dis	2022	35134180
Trends in transmitted drug-resistant HIV-1 and demographic characteristics of newly diagnosed patients: nationwide surveillance from 2003 to 2008 in Japan.	Hattori J; Shiino T; Gatanaga H; Yoshida S; Watanabe D; Minami R; Sadamasu K; Kondo M; Mori H; Ueda M; Tateyama M; Ueda A; Kato S; Ito T; Oie M; Takata N; Hayashida T; Nagashima M; Matsuda M; Ibe S; Ota Y; Sasaki S; Ishigatsubo Y; Tanabe Y; Koga I; Kojima Y; Yamamoto M; Fujita J; Yokomaku Y; Koike T; Shirasaka T; Oka S; Sugiura W	Antiviral Res	2010	20692295
Bictegravir/Tenofovir Alafenamide/Emtricitabine: A Real-Life Experience in People Living with HIV (PLWH).	Gidari A; Benedetti S; Tordi S; Zoffoli A; Altobelli D; Schiaroli E; De Socio GV; Francisci D	Infect Dis Rep	2023	38131882
Evaluation of the ABL NGS assay for HIV-1 drug resistance testing.	Lhossein T; Sylvain K; Descamps V; Morel V; Demey B; Brochot E	Heliyon	2023	38058650
Resistance Analyses in Highly Treatment-Experienced People With Human Immunodeficiency Virus (HIV) Treated With the Novel Capsid HIV Inhibitor Lenacapavir.	Margot NA; Naik V; VanderVeen L; Anoshchenko O; Singh R; Dvory-Sobol H; Rhee MS; Callebaut C	J Infect Dis	2022	36082606
Evolution of protease inhibitor resistance in the gag and pol genes of HIV subtype G isolates.	Knops E; Däumer M; Awerkiew S; Kartashev V; Schülter E; Kutsev S; Brakier-Gingras L; Kaiser R; Pfister H; Verheyen J	J Antimicrob Chemother	2010	20430786
Characteristics of HIV-1 Molecular Epidemiology in Suzhou, China, from 2009 to 2014.	Yuan Y; Tang S; Li Y; Yan D; Peng Q; Ya X; Song Y	Virol Sin	2018	29549651
Novel HIV-1 Recombinant Identified in a Foreign Heterosexual Resident in Japan: Relatedness to Recently Reported CRF69_01B, Detected Primarily among Japanese Men Who Have Sex with Men.	Kusagawa S; Yokota Y; Negishi M; Kondo M; Matano T; Kato S; Takebe Y	Genome Announc	2015	26021911
Optimizing antiretroviral therapy for children living with HIV: Experience from an observational cohort in Lesotho.	Tukei VJ; Herrera N; Masitha M; Masenyetse L; Mokone M; Mokone M; Maile L; Gill MM	PLoS One	2023	37459349
Polymorphisms of HIV-2 integrase and selection of resistance to raltegravir.	Bercoff DP; Triqueneaux P; Lambert C; Oumar AA; Ternes AM; Dao S; Goubau P; Schmit JC; Ruelle J	Retrovirology	2010	21114823
Epidemiological, Clinical and Antiretroviral Susceptibility Characterization of Human Immunodeficiency Virus Subtypes B and Non-B in Pernambuco, Northeast Brazil.	Lima K; de Souza Leal É; Cavalcanti AM; Salustiano DM; de Medeiros LB; da Silva SP; Lacerda HR	PLoS One	2016	27218259
HIV-1 recombinants with multiple parental strains in low-prevalence, remote regions of Cameroon: evolutionary relics?	Carr JK; Wolfe ND; Torimiro JN; Tamoufe U; Mpoudi-Ngole E; Eyzaguirre L; Birx DL; McCutchan FE; Burke DS	Retrovirology	2010	20426823
Long-Range HIV Genotyping Using Viral RNA and Proviral DNA for Analysis of HIV Drug Resistance and HIV Clustering.	Novitsky V; Zahralban-Steele M; McLane MF; Moyo S; van Widenfelt E; Gaseitsiwe S; Makhema J; Essex M	J Clin Microbiol	2015	26041893
Distinct viral reservoirs in individuals with spontaneous control of HIV-1.	Jiang C; Lian X; Gao C; Sun X; Einkauf KB; Chevalier JM; Chen SMY; Hua S; Rhee B; Chang K; Blackmer JE; Osborn M; Peluso MJ; Hoh R; Somsouk M; Milush J; Bertagnolli LN; Sweet SE; Varriale JA; Burbelo PD; Chun TW; Laird GM; Serrao E; Engelman AN; Carrington M; Siliciano RF; Siliciano JM; Deeks SG; Walker BD; Lichterfeld M; Yu XG	Nature	2020	32848246
Subtype-independent near full-length HIV-1 genome sequencing and assembly to be used in large molecular epidemiological studies and clinical management.	Grossmann S; Nowak P; Neogi U	J Int AIDS Soc	2015	26115688
Characterization of HIV-1 CRF90_BF1 and putative novel CRFs_BF1 in Central West, North and Northeast Brazilian regions.	Reis MNDG; Bello G; Guimarães ML; Stefani MMA	PLoS One	2017	28628667
Antiretroviral-Experienced HIV-1-Infected Patients Treated with Maraviroc: Factors Associated with Virological Response.	Soulie C; Peytavin G; Charpentier C; Lambert-Niclot S; Sayon S; Visseaux B; Simon A; Katlama C; Yazdanpanah Y; Descamps D; Calvez V; Marcelin AG	AIDS Res Hum Retroviruses	2015	25420695
Short Communication: Increase of HIV-1 K103N Transmitted Drug Resistance and Its Association with Efavirenz Use in South Korea.	Chin BS; Shin HS; Kim G; Wagner GA; Gianella S; Smith DM	AIDS Res Hum Retroviruses	2015	25826122
Lenacapavir administered every 26 weeks or daily in combination with oral daily antiretroviral therapy for initial treatment of HIV: a randomised, open-label, active-controlled, phase 2 trial.	Gupta SK; Berhe M; Crofoot G; Benson P; Ramgopal M; Sims J; McDonald C; Ruane P; Sanchez WE; Scribner A; Liu SY; VanderVeen LA; Dvory-Sobol H; Rhee MS; Baeten JM; Koenig E	Lancet HIV	2023	36566079
HIV-1 resistance patterns to integrase inhibitors in antiretroviral-experienced patients with virological failure on raltegravir-containing regimens.	da Silva D; Van Wesenbeeck L; Breilh D; Reigadas S; Anies G; Van Baelen K; Morlat P; Neau D; Dupon M; Wittkop L; Fleury H; Masquelier B	J Antimicrob Chemother	2010	20388636
Impact of Integrase Sequences from HIV-1 Subtypes A6/A1 on the In Vitro Potency of Cabotegravir or Rilpivirine.	Jeffrey JL; St Clair M; Wang P; Wang C; Li Z; Beloor J; Talarico C; Fridell R; Krystal M; White CT; Griffith S; D'Amico R; Smith K; Van Eygen V; Vingerhoets J; Vandermeulen K; Spreen W; van Lunzen J	Antimicrob Agents Chemother	2022	34978890
In vitro activity of dolutegravir against wild-type and integrase inhibitor-resistant HIV-2.	Smith RA; Raugi DN; Pan C; Sow PS; Seydi M; Mullins JI; Gottlieb GS; University of Washington-Dakar HIV-2 Study Group	Retrovirology	2015	25808007
Low Rates of Transmitted Drug Resistance Among Newly Identified HIV-1 Seroconverters in Rural Rakai, Uganda.	Reynolds SJ; Ssempijja V; Galiwango R; Ndyanabo A; Nakigozi G; Lyagoba F; Nazziwa J; Redd A; Lamers SL; Gray R; Wawer M; Serwadda D; Quinn TC	AIDS Res Hum Retroviruses	2017	27798967
Safety and efficacy of doravirine as first-line therapy in adults with HIV-1: week 192 results from the open-label extensions of the DRIVE-FORWARD and DRIVE-AHEAD phase 3 trials.	Orkin C; Molina JM; Cahn P; Lombaard J; Supparatpinyo K; Kumar S; Campbell H; Wan H; Teal V; Jin Xu Z; Asante-Appiah E; Sklar P; Teppler H; Lahoulou R; DRIVE-FORWARD and DRIVE-AHEAD collaborators	Lancet HIV	2024	38141637
Viral suppression and HIV-1 drug resistance 1 year after pragmatic transitioning to dolutegravir first-line therapy in Malawi: a prospective cohort study.	Schramm B; Temfack E; Descamps D; Nicholas S; Peytavin G; Bitilinyu-Bangoh JE; Storto A; Lê MP; Abdi B; Ousley J; Kalua T; Calvez V; Jahn A; Marcelin AG; Szumilin E	Lancet HIV	2022	35905753
Relationship between intact HIV-1 proviruses in circulating CD4+ T cells and rebound viruses emerging during treatment interruption.	Lu CL; Pai JA; Nogueira L; Mendoza P; Gruell H; Oliveira TY; Barton J; Lorenzi JCC; Cohen YZ; Cohn LB; Klein F; Caskey M; Nussenzweig MC; Jankovic M	Proc Natl Acad Sci U S A	2018	30420517
Phylogenetic analysis of HIV-1 subtypes and drug resistance profile among treatment-naïve people in Kuwait.	Chehadeh W; Albaksami O; Altawalah H; Ahmad S; Madi N; John SE; Abraham PS; Al-Nakib W	J Med Virol	2015	25976289
We should not stop considering HIV drug resistance testing at failure of first-line antiretroviral therapy.	Kantor R; Gupta RK	Lancet HIV	2023	36610438
Resistance-associated mutations to etravirine (TMC-125) in antiretroviral-naïve patients infected with non-B HIV-1 subtypes.	Maïga AI; Descamps D; Morand-Joubert L; Malet I; Derache A; Cisse M; Koita V; Akonde A; Diarra B; Wirden M; Tounkara A; Verlinden Y; Katlama C; Costagliola D; Masquelier B; Calvez V; Marcelin AG	Antimicrob Agents Chemother	2010	20008779
HIV-1 Resistance to Islatravir/Tenofovir Combination Therapy in Wild-Type or NRTI-Resistant Strains of Diverse HIV-1 Subtypes.	Cilento ME; Wen X; Reeve AB; Ukah OB; Snyder AA; Carrillo CM; Smith CP; Edwards K; Wahoski CC; Kitzler DR; Kodama EN; Mitsuya H; Parniak MA; Tedbury PR; Sarafianos SG	Viruses	2023	37896768
HIV-1 non-B subtypes: High transmitted NNRTI-resistance in Spain and impaired genotypic resistance interpretation due to variability.	Yebra G; de Mulder M; del Romero J; Rodríguez C; Holguín A	Antiviral Res	2010	20004217
Low-Bias RNA Sequencing of the HIV-2 Genome from Blood Plasma.	James KL; de Silva TI; Brown K; Whittle H; Taylor S; McVean G; Esbjörnsson J; Rowland-Jones SL	J Virol	2019	30333167
Structured observations reveal slow HIV-1 CTL escape.	Roberts HE; Hurst J; Robinson N; Brown H; Flanagan P; Vass L; Fidler S; Weber J; Babiker A; Phillips RE; McLean AR; Frater J; SPARTAC trial investigators	PLoS Genet	2015	25642847
Genetic Changes in HIV-1 Gag-Protease Associated with Protease Inhibitor-Based Therapy Failure in Pediatric Patients.	Giandhari J; Basson AE; Coovadia A; Kuhn L; Abrams EJ; Strehlau R; Morris L; Hunt GM	AIDS Res Hum Retroviruses	2015	25919760
Virological Non-Suppression among Newly Diagnosed HIV-Positive Individuals on Dolutegravir-Based Antiretroviral Treatment in Eastern Ethiopia: Follow-Up Study.	Gemechu A; Mihret A; Atire FA; Aseffa A; Howe R; Seyoum B; Mulu A	Trop Med Infect Dis	2023	37624329
HIV-1 Genetic Diversity and Its Impact on Baseline CD4+T Cells and Viral Loads among Recently Infected Men Who Have Sex with Men in Shanghai, China.	Li X; Xue Y; Cheng H; Lin Y; Zhou L; Ning Z; Wang X; Yu X; Zhang W; Shen F; Zheng X; Gai J; Li X; Kang L; Nyambi P; Wang Y; Zhuang M; Pan Q; Zhuang X; Zhong P	PLoS One	2015	26121491
Novel HIV-1 A6/B recombinant forms (CRF133_A6B and URF_A6/B) circulating in Krasnoyarsk region, Russia.	Maksimenko LV; Sivay MV; Totmenin AV; Shvalov AN; Skudarnov SE; Ostapova TS; Yaschenko SV; Maksutov RA; Gashnikova NM	J Infect	2022	36216190
Lopinavir/Ritonavir Monotherapy as Second-line Antiretroviral Treatment in Resource-Limited Settings: Week 104 Analysis of AIDS Clinical Trials Group (ACTG) A5230.	Kumarasamy N; Aga E; Ribaudo HJ; Wallis CL; Katzenstein DA; Stevens WS; Norton MR; Klingman KL; Hosseinipour MC; Crump JA; Supparatpinyo K; Badal-Faesen S; Bartlett JA	Clin Infect Dis	2015	25694653
Massive Iatrogenic Outbreak of Human Immunodeficiency Virus Type 1 in Rural Cambodia, 2014-2015.	Rouet F; Nouhin J; Zheng DP; Roche B; Black A; Prak S; Leoz M; Gaudy-Graffin C; Ferradini L; Mom C; Mam S; Gautier C; Lesage G; Ken S; Phon K; Kerleguer A; Yang C; Killam W; Fujita M; Mean C; Fontenille D; Barin F; Plantier JC; Bedford T; Ramos A; Saphonn V	Clin Infect Dis	2018	29211835
Emergence of the G118R Pan-Integrase Resistance Mutation as a Result of Low Compliance to a Dolutegravir-Based cART.	Mens H; Fjordside L; Fonager J; Gerstoft J	Infect Dis Rep	2022	35893472
Drug resistance pattern among ART-naive clients attending an HIV testing and counseling center in Dhaka, Bangladesh.	Rahman S; Sarker MS; Aralaguppe SG; Sarwar G; Khan SI; Rahman M	J Med Virol	2022	34636431
HIV-1 reverse transcriptase drug-resistance mutations in chronically infected individuals receiving or naïve to HAART in Cameroon.	Burda ST; Viswanath R; Zhao J; Kinge T; Anyangwe C; Tinyami ET; Haldar B; Powell RL; Jarido V; Hewlett IK; Nyambi PN	J Med Virol	2010	20029816
Evolution of a novel pathway leading to dolutegravir resistance in a patient harbouring N155H and multiclass drug resistance.	Hardy I; Brenner B; Quashie P; Thomas R; Petropoulos C; Huang W; Moisi D; Wainberg MA; Roger M	J Antimicrob Chemother	2015	25281399
Polymorphic substitution E157Q in HIV-1 integrase increases R263K-mediated dolutegravir resistance and decreases DNA binding activity.	Anstett K; Cutillas V; Fusco R; Mesplède T; Wainberg MA	J Antimicrob Chemother	2016	27084918
Accumulation of Multiple Mutations In Vivo Confers Cross-Resistance to New and Existing Integrase Inhibitors.	Zhang WW; Cheung PK; Oliveira N; Robbins MA; Harrigan PR; Shahid A	J Infect Dis	2018	30010985
Mutation V111I in HIV-2 reverse transcriptase increases the fitness of the nucleoside analogue-resistant K65R and Q151M viruses.	Deuzing IP; Charpentier C; Wright DW; Matheron S; Paton J; Frentz D; van de Vijver DA; Coveney PV; Descamps D; ANRS CO5 HIV-2 Cohort; Boucher CA; Beerens N	J Virol	2015	25355888
Differences in Evolution of HIV-1 Subtype C Reverse Transcriptase Between Children and Adults Likely Explained by Maturity of Cytotoxic T-Lymphocyte Responses.	Saravanan S; Gomathi S; Kausalya B; Boobalan J; Murugavel KG; Balakrishnan P; Mothi SN; Solomon SS; Kumarasamy N; Selvamuthu P; Solomon S; Smith DM	AIDS Res Hum Retroviruses	2015	25839730
Tracking HIV-1 recombination to resolve its contribution to HIV-1 evolution in natural infection.	Song H; Giorgi EE; Ganusov VV; Cai F; Athreya G; Yoon H; Carja O; Hora B; Hraber P; Romero-Severson E; Jiang C; Li X; Wang S; Li H; Salazar-Gonzalez JF; Salazar MG; Goonetilleke N; Keele BF; Montefiori DC; Cohen MS; Shaw GM; Hahn BH; McMichael AJ; Haynes BF; Korber B; Bhattacharya T; Gao F	Nat Commun	2018	29765018
Trends of subtype variation of human immunodeficiency virus type 1 in Zhejiang Province, China.	Yao Y; Xin R; Yang J; Xu Y; Zhang J; Xia Y; Pan X; Guo Z; Song Y	Virus Genes	2015	25410050
HIV-1 reservoir evolution in infants infected with clade C from Mozambique.	Koofhethile CK; Rinaldi S; Rassadkina Y; Dinh VB; Gao C; Pallikkuth S; Garcia-Broncano P; de Armas LR; Pahwa R; Cotugno N; Vaz P; Lain MG; Palma P; Yu XG; Shapiro R; Pahwa S; Lichterfeld M	Int J Infect Dis	2023	36476348
Panel of prototypical raltegravir-resistant infectious molecular clones in a novel integrase-deleted cloning vector.	Reuman EC; Bachmann MH; Varghese V; Fessel WJ; Shafer RW	Antimicrob Agents Chemother	2010	19917747
Effectiveness and safety of tenofovir gel, an antiretroviral microbicide, for the prevention of HIV infection in women.	Abdool Karim Q; Abdool Karim SS; Frohlich JA; Grobler AC; Baxter C; Mansoor LE; Kharsany AB; Sibeko S; Mlisana KP; Omar Z; Gengiah TN; Maarschalk S; Arulappan N; Mlotshwa M; Morris L; Taylor D; CAPRISA 004 Trial Group	Science	2010	20643915
The HIV-1 reservoir landscape in persistent elite controllers and transient elite controllers.	Gasca-Capote C; Lian X; Gao C; Roseto IC; Jiménez-León MR; Gladkov G; Camacho-Sojo MI; Pérez-Gómez A; Gallego I; Lopez-Cortes LE; Bachiller S; Vitalle J; Rafii-El-Idrissi Benhnia M; Ostos FJ; Collado-Romacho AR; Santos J; Palacios R; Gomez-Ayerbe C; Muñoz-Medina L; Ruiz-Sancho A; Frias M; Rivero-Juarez A; Roca-Oporto C; Hidalgo-Tenorio C; Rull A; Olalla J; Lopez-Ruz MA; Vidal F; Viladés C; Mastra…	J Clin Invest	2024	38376918
HIV-infected sex workers with beneficial HLA-variants are potential hubs for selection of HIV-1 recombinants that may affect disease progression.	Chang CH; Kist NC; Stuart Chester TL; Sreenu VB; Herman M; Luo M; Lunn D; Bell J; Plummer FA; Ball TB; Katzourakis A; Iversen AK	Sci Rep	2015	26082240
Factors Associated with the Development of Drug Resistance Mutations in HIV-1 Infected Children Failing Protease Inhibitor-Based Antiretroviral Therapy in South Africa.	Rossouw TM; Feucht UD; Melikian G; van Dyk G; Thomas W; du Plessis NM; Avenant T	PLoS One	2015	26196688
Genetic Characterization of a Unique Recombinant Originating from CRF55_01B, CRF01_AE, and CRF07_BC in Shenzhen, China.	Gui T; Zhao J; Sun C; Chen L; Liu Y; Zheng C; Li H; Li T; Bao Z; Wang X; Li J; Li L	AIDS Res Hum Retroviruses	2015	25748656
HIV-1 acquired drug resistance to integrase inhibitors in a cohort of antiretroviral therapy multi-experienced Mexican patients failing to raltegravir: a cross-sectional study.	Orta-Resendiz A; Rodriguez-Diaz RA; Angulo-Medina LA; Hernandez-Flores M; Soto-Ramirez LE	AIDS Res Ther	2020	32041622
Clade homogeneity and Pol gene polymorphisms in chronically HIV-1 infected antiretroviral treatment naive patients after the roll out of ART in Ethiopia.	Mulu A; Lange T; Liebert UG; Maier M	BMC Infect Dis	2014	24655349
Transmitted HIV Drug Resistance in Bulgaria Occurs in Clusters of Individuals from Different Transmission Groups and Various Subtypes (2012-2020).	Alexiev I; Shankar A; Pan Y; Grigorova L; Partsuneva A; Dimitrova R; Gancheva A; Kostadinova A; Elenkov I; Yancheva N; Grozdeva R; Strashimirov D; Stoycheva M; Baltadzhiev I; Doichinova T; Pekova L; Kosmidis M; Emilova R; Nikolova M; Switzer WM	Viruses	2023	37112921
Viral Evolution and Cytotoxic T Cell Restricted Selection in Acute Infant HIV-1 Infection.	Garcia-Knight MA; Slyker J; Payne BL; Pond SL; de Silva TI; Chohan B; Khasimwa B; Mbori-Ngacha D; John-Stewart G; Rowland-Jones SL; Esbjörnsson J	Sci Rep	2016	27403940
Low rate of transmitted drug resistance may indicate low access to antiretroviral treatment in Maranhão State, northeast Brazil.	Moura ME; Reis MN; Lima YA; Eulálio KD; Cardoso LP; Stefani MM	AIDS Res Hum Retroviruses	2015	25411830
Enhanced detection of viral diversity using partial and near full-length genomes of human immunodeficiency virus Type 1 provirus deep sequencing data from recently infected donors at four blood centers in Brazil.	Pessôa R; Watanabe JT; Calabria P; Alencar CS; Loureiro P; Lopes ME; Proetti AB; Félix AC; Sabino EC; Busch MP; Sanabani SS; International Component of the NHLBI Recipient Epidemiology and Donor Evaluation Study-III (REDS-III)	Transfusion	2015	25413141
Impact of Antiretroviral Therapy Duration on HIV-1 Infection of T Cells within Anatomic Sites.	Lee E; von Stockenstrom S; Morcilla V; Odevall L; Hiener B; Shao W; Hartogensis W; Bacchetti P; Milush J; Liegler T; Sinclair E; Hatano H; Hoh R; Somsouk M; Hunt P; Boritz E; Douek D; Fromentin R; Chomont N; Deeks SG; Hecht FM; Palmer S	J Virol	2020	31723024
Pretreatment HIV Drug Resistance and HIV-1 Subtype C Are Independently Associated With Virologic Failure: Results From the Multinational PEARLS (ACTG A5175) Clinical Trial.	Kantor R; Smeaton L; Vardhanabhuti S; Hudelson SE; Wallis CL; Tripathy S; Morgado MG; Saravanan S; Balakrishnan P; Reitsma M; Hart S; Mellors JW; Halvas E; Grinsztejn B; Hosseinipour MC; Kumwenda J; La Rosa A; Lalloo UG; Lama JR; Rassool M; Santos BR; Supparatpinyo K; Hakim J; Flanigan T; Kumarasamy N; Campbell TB; Eshleman SH; AIDS Clinical Trials Group (ACTG) A5175 Study Team	Clin Infect Dis	2015	25681380
Molecular dating and viral load growth rates suggested that the eclipse phase lasted about a week in HIV-1 infected adults in East Africa and Thailand.	Rolland M; Tovanabutra S; Dearlove B; Li Y; Owen CL; Lewitus E; Sanders-Buell E; Bose M; O'Sullivan A; Rossenkhan R; Labuschagne JPL; Edlefsen PT; Reeves DB; Kijak G; Miller S; Poltavee K; Lee J; Bonar L; Harbolick E; Ahani B; Pham P; Kibuuka H; Maganga L; Nitayaphan S; Sawe FK; Eller LA; Gramzinski R; Kim JH; Michael NL; Robb ML; RV217 Study Team	PLoS Pathog	2020	32027734
