# Supplementary material for: Fine-tuned large language models for answering questions about full-text biomedical research studies
Source: medRxiv preprint, doi:10.1101/2024.10.28.24316263, version 2 (2024-11-25)
Supplement: S2 Table [file 316263_file03.xlsx]

## Sheet: Sheet1
PMID	QID	Question	Evidence	Rationale	Answer
19686436	1	Does the paper report HIV sequences from patient samples?	The HIV-1 pol sequences have been submitted to GenBank under accession numbers FJ800379-FJ800386, FJ800388-FJ800438, FJ800440-FJ800505 and FJ823645-FJ823657.	The authors have explicitly stated that the sequences in the study have been submitted to GenBank.	Yes
19686436	2	Does the paper report in vitro drug susceptibility data?	We collected samples from 138 individuals (97 adults and 41 children) on cART with virological, immunological or clinical signs of treatment failure. HIV-1 *pol* sequences were obtained using an in-house method. Resistance mutations were identified according to the 2007 International AIDS Society (IAS)-USA list and predicted susceptibility to cART was scored using the anrs algorithm.	The paper focuses on genotypic resistance testing and the prevalence of resistance mutations in patient samples. It does not mention performing in vitro drug susceptibility assays.	No
19686436	3	Were sequences from the paper made publicly available?	"The HIV-1 *pol* sequences have been submitted to GenBank under accession numbers FJ800379--FJ800386, FJ800388--FJ800438, FJ800440--FJ800505 and FJ823645--FJ823657."	The paper explicitly lists the GenBank accession numbers for the sequenced HIV isolates.	Yes
19686436	4	What were the GenBank accession numbers for sequenced HIV isolates?	"The HIV-1 *pol* sequences have been submitted to GenBank under accession numbers FJ800379--FJ800386, FJ800388--FJ800438, FJ800440--FJ800505 and FJ823645--FJ823657."	The paper explicitly lists the GenBank accession numbers for the sequenced HIV isolates.	FJ800379--FJ800386, FJ800388--FJ800438, FJ800440--FJ800505, FJ823645--FJ823657
19686436	5	How many individuals had samples obtained for HIV sequencing?	We collected samples from 138 individuals (97 adults and 41 children) on cART with virological, immunological or clinical signs of treatment failure.	The papper mentioned that they "collected samples from 138 individual"	138
19686436	6	From which countries were the sequenced samples obtained?	The ethics committee at the National Autonomous University of Honduras and the Regional Medical Ethics Board in Stockholm, Sweden approved the study (Dnr. 21/2007-77). Blood samples (10–20 mL of sodium citrate-treated whole blood) for genotypic resistance testing were collected in Honduras. Plasma and PBMCs were separated in a polyester gel and a density gradient liquid (BD Vacutainer™ CPT™ Tube)…	The paper states that the study was conducted on patients from Honduras and that the samples were collected from two major medical facilities in the country.	Honduras
19686436	7	From what years were the sequenced samples obtained?	Patients were invited to participate in the study by their medical doctors. After they had consented, whole blood was collected in BD Vacutainer® Cell Preparation Tubes (Becton Dickinson, Franklin Lakes, NJ, USA) to obtain plasma and peripheral blood mononuclear cells (PBMCs). The study samples were collected between June 2004 and April 2007.	Paper mentioned samples were collected between June 2004 and April 2007.	2004-2007
19686436	8	Were samples cloned prior to sequencing?	RNA or DNA was extracted from plasma or PBMCs using the QIAmp RNA or DNA kit (Qiagen, Hilden, Germany). The RNA was used to generate cDNA, whereas the DNA was directly used for polymerase chain reaction (PCR).	The paper mentioned that the DNA was directly used for PCR.	No
19686436	9	Which HIV genes were reported to have been sequenced?	"A nested PCR for the *pol* gene was performed for sequencing using a reaction mixture and cycling conditions as described previously \[ 14 \], with some modification of primers. The sequencing primers were JA273 (outer forward CCCTCAAATCACTCTTTGGC), JA274 (inner forward AAAATC CATACAATACTCCA), JA275 (inner reverse TTATTGAGTTCTCTGAAATC) and JA276 (outer reverse TGTATATCATTGACAGTCCA). We collected…	The paper mentions that a nested PCR for the *pol* gene was performed for sequencing	Pol
19686436	10	What method was used for sequencing?	A nested PCR for the pol gene was performed for sequencing using a reaction mixture and cycling conditions as described previously. DNA sequencing was performed on an ABI Prism™ 3100 Genetic Analyser (Applied Biosystems, Stockholm, Sweden). The sequence fragments were assembled and analysed using the software program sequencher™ (Gene Codes Corporation, Ann Arbor, MI, USA).	The paper describes that DNA sequencing was performed on an ABI Prism 3100 Genetic Analyser, which is a platform used for Sanger sequencing.	Sanger sequencing
19686436	11	What type of samples were sequenced?	Resistance testing was carried out on plasma RNA or PBMC DNA using an in-house method. Briefly, RNA or DNA was extracted from plasma or PBMCs using the QIAmp RNA or DNA kit (Qiagen, Hilden, Germany).	The paper mentions that plasma and PBMCs were used for resistance testing.	Plasma, PBMC
19686436	12	Were any sequences obtained from individuals with virological failure on a treatment regimen?	We collected samples from 138 individuals (97 adults and 41 children) on cART with virological, immunological or clinical signs of treatment failure. The patients had received a median of two (range one to six) different ART regimens.	The paper states that samples were collected from individuals with virological, immunological, or clinical signs of treatment failure.	Yes
19686436	13	Were the patients in the study in a clinical trial?	Patients were invited to participate in the study by their medical doctors. After they had consented, whole blood was collected in BD Vacutainer® Cell Preparation Tubes (Becton Dickinson, Franklin Lakes, NJ, USA) to obtain plasma and peripheral blood mononuclear cells (PBMCs).	The paper does not mention that the patients were part of a clinical trial, the patients were invited by their medial doctors.	No
19686436	14	Does the paper report HIV sequences from individuals who had previously received ARV drugs?	We collected samples from 138 individuals (97 adults and 41 children) on cART with virological, immunological or clinical signs of treatment failure. The patients had received a median of two (range one to six) different ART regimens. At the time of sampling for resistance testing, 50% of the patients were receiving two NRTIs+one NNRTI, 47% were receiving two NRTIs+one PI, and 3% were receiving t…	The paper mentions that subjects were on cART and had received a median of two (range one to six) different ART regimens.	Yes
19686436	15	Which drug classes were received by individuals in the study before sample sequencing?	At the time of sampling for resistance testing, 50% of the patients were receiving two NRTIs+one NNRTI, 47% were receiving two NRTIs+one PI, and 3% were receiving triple-class therapy (one NRTI+one NNRTI+one PI). The most common drug combinations were: zidovudine+lamivudine+efavirenz (40 patients), stavudine+lamivudine+nelfinavir (13 patients), stavudine+lamivudine+nevirapine (12 patients), and z…	The paper mentions that patients were receiving combinations of NRTIs, NNRTIs, and PIs at the time of sampling for resistance testing	NRTI, NNRTI, PI
19686436	16	Which drugs were received by individuals in the study before sample sequencing?	At the time of sampling for resistance testing, 50% of the patients were receiving two NRTIs+one NNRTI, 47% were receiving two NRTIs+one PI, and 3% were receiving triple-class therapy (one NRTI+one NNRTI+one PI). The most common drug combinations were: zidovudine+lamivudine+efavirenz (40 patients), stavudine+lamivudine+nelfinavir (13 patients), stavudine+lamivudine+nevirapine (12 patients), and z…	The paper lists the specific drug combinations that patients were receiving at the time of sampling for resistance testing	Zidovudine (AZT), Lamivudine (3TC), Efavirenz (EFV), Stavudine (D4T), Nelfinavir (NFV), Nevirapine (NVP), Indinavir (IDV)
19913270	1	Does the paper report HIV sequences from patient samples?	A cohort of twenty women experiencing primary HIV-1 infections was recruited as part of the CAPRISA 002 acute infection study. To identify potential “transmission signatures”, we compared 20 full-length HIV-1 subtype C genomes from primary infections, with 66 sampled from ethnically and geographically matched individuals with chronic infections.	The paper mentions that full-length HIV-1 subtype C genomes were sequenced from 20 women experiencing primary HIV-1 infections. This indicates that the sequences were obtained from patient samples.	Yes
19913270	2	Does the paper report in vitro drug susceptibility data?	To identify potential “transmission signatures”, we compared 20 full-length HIV-1 subtype C genomes from primary infections, with 66 sampled from ethnically and geographically matched individuals with chronic infections. Controlling for recombination and phylogenetic relatedness, we identified 39 sites at which amino acid frequency spectra differed significantly between groups. These sites were p…	The paper does not mention any in vitro drug susceptibility testing.	No
19913270	3	Were sequences from the paper made publicly available?	Nucleotide sequence accession numbers All near full-length sequences were submitted to GenBank under accession numbers GQ999972 to GQ999991.	Paper mentions sequences were submitted to GenBank, and shows the GenBank accession numbers.	Yes
19913270	4	What were the GenBank accession numbers for sequenced HIV isolates?	Nucleotide sequence accession numbers All near full-length sequences were submitted to GenBank under accession numbers GQ999972 to GQ999991.	Paper mentions sequences were submitted to GenBank, and shows the GenBank accession numbers.	GQ999972 to GQ999991
19913270	5	How many individuals had samples obtained for HIV sequencing?	Amplicons were cloned and sequenced from each of the 20 study participants.	Paper mentioned "Amplicons were cloned and sequenced from each of the 20 study participants.", leading to 20 total.	20
19913270	6	From which countries were the sequenced samples obtained?	"Similar to the sequences from primary infection, the chronic infection sequences were obtained from heterosexually infected women with the same ethnic background (Xhosa/ Zulu) and from the same geographic location (KwaZulu-Natal, South Africa)."	The paper states that the study participants were from KwaZulu-Natal, South Africa.	South Africa
19913270	7	From what years were the sequenced samples obtained?	No evidence	The paper does not provide specific years during which the samples were obtained.	Not reported
19913270	8	Were samples cloned prior to sequencing?	Full-length genomes were amplified and genetic homogeneity in V1V2 of the template, indicative of amplification from a single genome, was confirmed for 13 out of 20 amplicons. Heterogeneity was identified in each of the remaining seven samples (Table 1). Amplicons were cloned and sequenced from each of the 20 study participants. All 20 of the full length genome sequences clearly belonged to HIV-1…	The paper mentions that amplicons were cloned and sequenced from each of the 20 study participants.	Yes
19913270	9	Which HIV genes were reported to have been sequenced?	Full-length genomes were amplified and genetic homogeneity in V1V2 of the template, indicative of amplification from a single genome, was confirmed for 13 out of 20 amplicons. we compared 20 full-length HIV-1 subtype C genomes from primary infections, with 66 sampled from ethnically and geographically matched individuals with chronic infections.	The paper mentions that full-length HIV-1 genomes were sequenced from the study participants.	Full length genome
19913270	10	What method was used for sequencing?	DNA sequencing reactions were performed using the ABI PRISM Dye Terminator Cycle sequencing kit V3.1 (Applied Biosystems, Foster City , CA, USA) using both the primers described by which are specifically optimised for HIV-1 subtype C sequencing, and those described by.	The paper describes the use of the ABI PRISM Dye Terminator Cycle sequencing kit V3.1, which is a method associated with Sanger sequencing.	Sanger sequencing
19913270	11	What type of samples were sequenced?	Plasma samples were obtained from twenty women who had been recently infected through heterosexual contact, and had been enrolled within three months of infection from prospective cohorts of high-risk HIV negative individuals as part of the CAPRISA 002 Acute Infection study.	The paper states that plasma samples were obtained from participants.	Plasma
19913270	12	Were any sequences obtained from individuals with virological failure on a treatment regimen?	Study subjects: All study participants were antiretroviral therapy naïve.	The paper mentions that all study participants were antiretroviral therapy naïve, indicating that they were not on a treatment regimen.	No
19913270	13	Were the patients in the study in a clinical trial?	A cohort of twenty women experiencing primary HIV-1 infections was recruited as part of the CAPRISA 002 acute infection study. Plasma samples were obtained from twenty women who had been recently infected through heterosexual contact, and had been enrolled within three months of infection from prospective cohorts of high-risk HIV negative individuals as part of the CAPRISA 002 Acute Infection stu…	The paper does not mention that the patients were part of a clinical trial. They were part of the CAPRISA 002 Acute Infection study, which is a cohort study.	No
19913270	14	Does the paper report HIV sequences from individuals who had previously received ARV drugs?	Study subjects: All study participants were antiretroviral therapy naïve.	The paper mentions that all study participants were antiretroviral therapy naïve, indicating that they had not previously received ARV drugs.	No
19913270	15	Which drug classes were received by individuals in the study before sample sequencing?	Study subjects: All study participants were antiretroviral therapy naïve.	The paper mentions that all study participants were antiretroviral therapy naïve, indicating that they had not received any drug classes before sample sequencing.	None
19913270	16	Which drugs were received by individuals in the study before sample sequencing?	Study subjects: All study participants were antiretroviral therapy naïve.	The paper mentions that all study participants were antiretroviral therapy naïve, indicating that they had not received any drugs before sample sequencing.	None
19917747	1	Does the paper report HIV sequences from patient samples?	Clinical plasma samples were obtained from 15 HIV-1-positive individuals who had developed virological failure while receiving raltegravir, including four individuals in whom established raltegravir resistance mutations were detected by direct PCR sequencing.	The paper mentions that clinical plasma samples were obtained from 15 HIV-1-positive individuals who had developed virological failure while receiving raltegravir. This indicates that the study involved HIV sequences from patient samples.	Yes
19917747	2	Does the paper report in vitro drug susceptibility data?	TABLE 1. Replication characteristics and in vitro raltegravir susceptibilities of recombinant infectious molecular HIV-1 clones created using clinically derived integrase coding regions. We created an HIV-1 cloning vector, pNL4.3ΔIN, to generate recombinant infectious molecular clones for analysis of patient-derived HIV-1 integrase coding regions. Using this vector, we constructed a panel of clin…	The paper mentions the contrustion of lab virus, and in vitro raltegravir susceptibility test of recombinant virus, which indicates the paper reports in vitro drug susceptibility data.	Yes
19917747	3	Were sequences from the paper made publicly available?	Nucleotide sequence accession numbers. The sequences of the clones shown in Table ​ Table1 1 are available in GenBank under accession nos. GU076499 , GU076502 , GU076504 to 8, and GU076510 to 12.	The paper explicitly lists the GenBank accession numbers for the sequenced HIV isolates in the section titled "Nucleotide sequence accession numbers."	Yes
19917747	4	What were the GenBank accession numbers for sequenced HIV isolates?	Nucleotide sequence accession numbers. The sequences of the clones shown in Table ​ Table1 1 are available in GenBank under accession nos. GU076499 , GU076502 , GU076504 to 8, and GU076510 to 12.	The paper explicitly lists the GenBank accession numbers for the sequenced HIV isolates in the section titled "Nucleotide sequence accession numbers."	GU076499, GU076502, GU076504, GU076505, GU076506, GU076507, GU076508, GU076510, GU076511, GU076512
19917747	5	How many individuals had samples obtained for HIV sequencing?	Clinical plasma samples were obtained from 15 HIV-1-positive individuals who had developed virological failure while receiving raltegravir.	The paper explicitly states that clinical plasma samples were obtained from 15 HIV-1-positive individuals.	15
19917747	6	From which countries were the sequenced samples obtained?	No evidence	The paper does not provide specific information about the countries from which the sequenced samples were obtained.	Not reported
19917747	7	From what years were the sequenced samples obtained?	No evidence	The paper does not mention the specific years during which the sequenced samples were obtained.	Not reported
19917747	8	Were samples cloned prior to sequencing?	The integrase sequences of 5 to 10 clones from each ligation reaction had mean numbers of uncorrected pairwise nucleotide and amino acid differences of 3.2 (range, 0 to 7.4) and 0.8 (range, 0 to 3.4), respectively. Two of the four clinical samples with raltegravir resistance mutations had clones with different patterns of mutations at INI resistance positions.	The paper describes that "Two of the four clinical samples with raltegravir resistance mutations had clones with different patterns of mutations at INI resistance positions"	Yes
19917747	9	Which HIV genes were reported to have been sequenced?	We created an HIV-1 cloning vector, pNL4.3ΔIN, to generate recombinant infectious molecular clones for analysis of patient-derived HIV-1 integrase coding regions; To assist researchers in developing new INIs, we created a vector for cloning patient-derived HIV-1 integrase coding regions into a full-length HIV-1 clone lacking integrase.	The paper mentions the study created a clone vector for in vitro susceptiblity test, which means the samples were not clinical samples, the sequence gene were not reported.	Not reported
19917747	10	What method was used for sequencing?	Clinical plasma samples were obtained from 15 HIV-1-positive individuals who had developed virological failure while receiving raltegravir, including four individuals in whom established raltegravir resistance mutations were detected by direct PCR sequencing.	The paper mentions the use of direct PCR sequencing, which is a method associated with Sanger sequencing.	Sanger sequencing
19917747	11	What type of samples were sequenced?	Clinical plasma samples were obtained from 15 HIV-1-positive individuals who had developed virological failure while receiving raltegravir, including four individuals in whom established raltegravir resistance mutations were detected by direct PCR sequencing.	The paper specifies that the study collected plasma samples.	Plasma
19917747	12	Were any sequences obtained from individuals with virological failure on a treatment regimen?	Clinical plasma samples were obtained from 15 HIV-1-positive individuals who had developed virological failure while receiving raltegravir, including four individuals in whom established raltegravir resistance mutations were detected by direct PCR sequencing.	The paper states that clinical plasma samples were obtained from individuals who had developed virological failure while receiving raltegravir.	Yes
19917747	13	Were the patients in the study in a clinical trial?	Clinical plasma samples were obtained from 15 HIV-1-positive individuals who had developed virological failure while receiving raltegravir, including four individuals in whom established raltegravir resistance mutations were detected by direct PCR sequencing.	The paper does not mention that the patients were part of a clinical trial. It only states that the samples were obtained from individuals who had developed virological failure while receiving raltegravir.	Not reported
19917747	14	Does the paper report HIV sequences from individuals who had previously received ARV drugs?	Clinical plasma samples were obtained from 15 HIV-1-positive individuals who had developed virological failure while receiving raltegravir.	The paper mentions that the individuals had developed virological failure while receiving raltegravir, indicating that they had previously received ARV drugs.	Yes
19917747	15	Which drug classes were received by individuals in the study before sample sequencing?	Clinical plasma samples were obtained from 15 HIV-1-positive individuals who had developed virological failure while receiving raltegravir.	The paper mentions that raltegravir, an integrase inhibitor (INSTI), was used.	INSTI
19917747	16	Which drugs were received by individuals in the study before sample sequencing?	Clinical plasma samples were obtained from 15 HIV-1-positive individuals who had developed virological failure while receiving raltegravir.	The paper specifically mentions that the individuals were receiving raltegravir, an integrase inhibitor.	Raltegravir
19933171	1	Does the paper report HIV sequences from patient samples?	"When VL was >50 copies/mL, a genotypic resistance test was performed. Samples were divided into aliquots and frozen in the National Reference Laboratory in Mali and genotyping was performed for children with an HIV-1 RNA level of >50 copies/mL at 6 months, as previously described in the Pitié-Salpêtrière Virology Laboratory, Paris, France. Among the 37 children with a detectable VL (>50 copies/m…	The paper discusses the genotypic resistance tests performed on HIV-1-infected children, indicating that HIV sequences were obtained from patient samples. Specifically, it mentions that genotyping was performed for children with an HIV-1 RNA level of >50 copies/mL at 6 months.	Yes
19933171	2	Does the paper report in vitro drug susceptibility data?	Patients and methods Ninety-seven HIV-1-infected children who started two nucleoside reverse transcriptase inhibitors (NRTIs) and one non-nucleoside reverse transcriptase inhibitor (NNRTI) (mainly zidovudine/lamivudine/nevirapine) in Mali were prospectively studied. Virological failure (VF) was defined as loss to follow-up, death or HIV-1 RNA viral load (VL) of >400 copies/mL at 6 months. When VL…	The paper in the abstract objectives section focuses on genotypic resistance testing and the presence of resistance mutations in patient samples but does not mention any in vitro drug susceptibility assays or data.	No
19933171	3	Were sequences from the paper made publicly available?	No evidence	The paper does not provide any GenBank accession numbers for the sequenced HIV isolates.	No
19933171	4	What were the GenBank accession numbers for sequenced HIV isolates?	No evidence	The paper does not provide any GenBank accession numbers for the sequenced HIV isolates.	Not reported
19933171	5	How many individuals had samples obtained for HIV sequencing?	"Among the 37 children with a detectable VL (>50 copies/mL), 33 were sampled for genotypic resistance testing."	The paper states that among the 37 children with a detectable viral load, 33 were sampled for genotypic resistance testing. So the answer is 33	33
19933171	6	From which countries were the sequenced samples obtained?	Ninety-seven HIV-1-infected children who started two nucleoside reverse transcriptase inhibitors (NRTIs) and one non-nucleoside reverse transcriptase inhibitor (NNRTI) (mainly zidovudine/lamivudine/nevirapine) in Mali were prospectively studied."	The study was conducted on HIV-1-infected children in Mali, as explicitly mentioned in The paper. The samples for genotypic resistance testing were obtained from children treated in Mali.	Mali
19933171	7	From what years were the sequenced samples obtained?	"All naive HIV-1-infected children who initiated a combination of two NRTIs and one NNRTI between September 2006 and October 2007 in one of the two HIV-dedicated clinics of the Gabriel Touré Hospital were enrolled in this study."	The paper states that the children who initiated a combination of two NRTIs and one NNRTI between September 2006 and October 2007 were enrolled in the study.	2006-2007
19933171	8	Were samples cloned prior to sequencing?	Resistance genotyping Samples were divided into aliquots and frozen in the National Reference Laboratory in Mali and genotyping was performed for children with an HIV-1 RNA level of >50 copies/mL at 6 months, as previously described in the Pitié-Salpêtrière Virology Laboratory, Paris, France.16 Resistance mutations were recorded according to the latest IAS-USA list of mutations	The paper does not mention any process of cloning samples prior to sequencing.	Not reported
19933171	9	Which HIV genes were reported to have been sequenced?	"Eight children showed no resistance mutations in the reverse transcriptase (RT) gene of their viruses and 22 children (73%) showed viruses harbouring resistance mutations. The major mutations were K103N and Y181C, followed by G190A, Y188L and V106A/M. The M184V/I mutation, associated with lamivudine resistance, was present in 19 cases (63%). Ninety-seven HIV-1-infected children who started two n…	The paper mentions that resistance mutations were recorded in the reverse transcriptase (RT) gene of the viruses from the children. This indicates that the RT gene was sequenced to identify these mutations.	RT
19933171	10	What method was used for sequencing?	Resistance genotyping Samples were divided into aliquots and frozen in the National Reference Laboratory in Mali and genotyping was performed for children with an HIV-1 RNA level of >50 copies/mL at 6 months, as previously described in the Pitié-Salpêtrière Virology Laboratory, Paris, France.16 Resistance mutations were recorded according to the latest IAS-USA list of mutations	The paper dose not mention the sequencing method.	Not reported
19933171	11	What type of samples were sequenced?	This study was a retrospective analysis of genotypic resistance tests, HIV-1 plasma RNA and CD4 cell counts, which were performed as recommended by the IMAARV guidelines for the use of antiretroviral agents in HIV-1-infected patients in the context of routine clinical practice.	The paper mentions that HIV-1 plasma RNA was measured and used for genotypic resistance testing.	Plasma
19933171	12	Were any sequences obtained from individuals with virological failure on a treatment regimen?	Level of viral load and antiretroviral resistance after 6 months of non-nucleoside reverse transcriptase inhibitor first-line treatment in HIV-1-infected children in Mali. Ninety-seven HIV-1-infected children who started two nucleoside reverse transcriptase inhibitors (NRTIs) and one non-nucleoside reverse transcriptase inhibitor (NNRTI) (mainly zidovudine/lamivudine/nevirapine) in Mali were pros…	The paper mentioned the children had started two NRTIs and one NNRTI and had virlogical failure at 6 months.	Yes
19933171	13	Were the patients in the study in a clinical trial?	This study was a retrospective analysis of genotypic resistance tests, HIV-1 plasma RNA and CD4 cell counts, which were performed as recommended by the IMAARV guidelines for the use of antiretroviral agents in HIV-1-infected patients in the context of routine clinical practice.	The paper describes the study as a retrospective analysis of genotypic resistance tests rather than a clinical trial.	No
19933171	14	Does the paper report HIV sequences from individuals who had previously received ARV drugs?	Seven children were born to mothers who received antiretroviral treatment during pregnancy. All naive HIV-1-infected children who initiated a combination of two NRTIs and one NNRTI between September 2006 and October 2007 in one of the two HIV-dedicated clinics of the Gabriel Toure Hospital were enrolled in this study. Ninety-seven HIV-1-infected children who started two nucleoside reverse transcr…	The paper mentions that all naïve children were initiated a combination of two NRTIs and one NNRTI between 2006 and 2007. 97 HIV-1 infected children started two NRTI and NNRTI in Mali were studied.	Yes
19933171	15	Which drug classes were received by individuals in the study before sample sequencing?	Ninety-seven HIV-1-infected children who started two nucleoside reverse transcriptase inhibitors (NRTIs) and one non-nucleoside reverse transcriptase inhibitor (NNRTI) (mainly zidovudine/lamivudine/nevirapine) in Mali were prospectively studied. . All naive HIV-1-infected children who initiated a combination of two NRTIs and one NNRTI between September 2006 and October 2007 in one of the two HIV-…	Paper mentioned they enrolled HIV-1-infected children who initiated a combination of two NRTIs and one NNRTI .	NRTI, NNRTI
19933171	16	Which drugs were received by individuals in the study before sample sequencing?	Ninety-seven HIV-1-infected children who started two nucleoside reverse transcriptase inhibitors (NRTIs) and one non-nucleoside reverse transcriptase inhibitor (NNRTI) (mainly zidovudine/lamivudine/nevirapine) in Mali were prospectively studied. Following national and WHO recommendations at the time of the study, the first-line regimen for children of all ages was an association of two nucleoside…	The paper mentions that the main therapeutic combinations included zidovudine or stavudine plus lamivudine plus nevirapine or efavirenz	Zidovudine (AZT), Lamivudine (3TC), Nevirapine (NVP), Stavudine (D4T), Efavirenz (EFV)
19933797	1	Does the paper report HIV sequences from patient samples?	"HIV-1 recombinant clinical isolates were generated by the recombination of HIV-1 RNA RT-PR sequences from clinical samples with an RT-PR-deleted HIV-1 HXB2 proviral clone ( 23 ), which was transfected into MT4 human T-lymphoblastoid cells ( 23 )."	The paper mentions that HIV-1 recombinant clinical isolates were generated from clinical samples, indicating that patient-derived sequences were used.	Yes
19933797	2	Does the paper report in vitro drug susceptibility data?	The HIV-1 site-directed mutant with Y181C was sensitive to TMC278, whereas that with K101P or Y181I/V was resistant. In vitro, considerable cross-resistance between TMC278 and etravirine was observed. Sensitivity to TMC278 was observed for 62% of efavirenz- and/or nevirapine-resistant HIV-1 recombinant clinical isolates. TMC278 inhibited viral replication at concentrations at which first-generati…	The paper includes in vitro drug susceptibility data by detailing the effectiveness of TMC278 against various HIV-1 isolates and mutations. It mentions specific effective concentrations (EC50 values) of TMC278 against wild-type and resistant strains of HIV-1, which are typically measured in vitro.	Yes
19933797	3	Were sequences from the paper made publicly available?	No evidence	The paper dose not report GenBank accession number. No sequence were not from clinical isolates.	No
19933797	4	What were the GenBank accession numbers for sequenced HIV isolates?	No evidence	The paper dose not report GenBank accession number. No sequence were not from clinical isolates.	Not reported
19933797	5	How many individuals had samples obtained for HIV sequencing?	All HIV-1 primary isolates, except for the HIV-1 clinical isolate WEJO, were obtained from the NIAID AIDS Research and Reference Reagent Program, Rockville, MD. WEJO was obtained from a pediatric patient attending the AIDS Clinic at the University of Alabama at Birmingham (10).	The paper does not mentionthe number of individuals.	Not reported
19933797	6	From which countries were the sequenced samples obtained?	No evidence	The paper mentions the creation of lab samples, not clinical samples. The paper does not provide the country.	Not reported
19933797	7	From what years were the sequenced samples obtained?	No evidence	The paper does not provide specific years for when the sequenced samples were obtained.	Not reported
19933797	8	Were samples cloned prior to sequencing?	HIV-1 site-directed mutants (SDMs) either were constructed in a pGEM vector encompassing the RT and protease (PR) coding sequences of HIV-1 HXB2 by using the QuikChange SDM kit (Stratagene, CA) or were obtained from a commercial supplier (Eurofins Medigenomix GmbH, Martinsried, Germany). Mutant viruses were generated by the recombination of mutant RT-PR sequences with an RT-PR-deleted HIV-1 HXB2 …	The paper describes the construction of HIV-1 site-directed mutants in a pGEM vector, which is not about molecular cloning.	No
19933797	9	Which HIV genes were reported to have been sequenced?	HIV-1 recombinant clinical isolates were generated by the recombination of HIV-1 RNA RT-PR sequences from clinical samples with an RT-PR-deleted HIV-1 HXB2 proviral clone ( 23 ), which was transfected into MT4 human T-lymphoblastoid cells ( 23 ).	The paper mentions sequencing the RT and PR coding sequences of HIV-1 HXB2 and the generation of HIV-1 recombinant clinical isolates using RT-PR sequences from clinical samples.	PR, RT
19933797	10	What method was used for sequencing?	Genotypic analyses were performed according to the vircoTYPE ( 51 ) methodology based on automated population-based DNA sequence analysis (ABI Prism BigDye Terminator cycle sequencing).	The paper mentions the use of the ABI Prism BigDye Terminator cycle sequencing method, and population-based DNA sequence analysis, which were sanger sequencing method	Sanger sequencing
19933797	11	What type of samples were sequenced?	Fresh human peripheral blood mononuclear cells (PBMCs) were isolated from healthy volunteer blood donors seronegative for HIV and hepatitis B virus. All HIV-1 primary isolates, except for the HIV-1 clinical isolate WEJO, were obtained from the NIAID AIDS Research and Reference Reagent Program, Rockville, MD. WEJO was obtained from a pediatric patient attending the AIDS Clinic at the University of…	The paer mentioned that the HIV-1 primary isolats were obtained from the NIAID AIDS Research and Reference Reagent Program, it doesn't mention if the sample were from plasma or PBMC. The PBMC is from healthy donor, not for virus sequencing.	Not reported
19933797	12	Were any sequences obtained from individuals with virological failure on a treatment regimen?	All HIV-1 primary isolates, except for the HIV-1 clinical isolate WEJO, were obtained from the NIAID AIDS Research and Reference Reagent Program, Rockville, MD. WEJO was obtained from a pediatric patient attending the AIDS Clinic at the University of Alabama at Birmingham (10).	The paer mentioned that the HIV-1 primary isolats were obtained from the NIAID AIDS Research and Reference Reagent Program, it doesn't mention the treatment history.	Not reported
19933797	13	Were the patients in the study in a clinical trial?	All HIV-1 primary isolates, except for the HIV-1 clinical isolate WEJO, were obtained from the NIAID AIDS Research and Reference Reagent Program, Rockville, MD. WEJO was obtained from a pediatric patient attending the AIDS Clinic at the University of Alabama at Birmingham (10).	The paper does not mention that the patients from whom the sequences were obtained were part of a clinical trial.	Not reported
19933797	14	Does the paper report HIV sequences from individuals who had previously received ARV drugs?	All HIV-1 primary isolates, except for the HIV-1 clinical isolate WEJO, were obtained from the NIAID AIDS Research and Reference Reagent Program, Rockville, MD. HIV-1 recombinant clinical isolates were generated by the recombination of HIV-1 RNA RT-PR sequences from clinical samples with an RT-PR-deleted HIV-1 HXB2 proviral clone (23), which was transfected into MT4 human T-lymphoblastoid cells	The paper doesn't report if the clincal isolates were from treatment naïve or treatment experienced individuals.	Not reported
19933797	15	Which drug classes were received by individuals in the study before sample sequencing?	All HIV-1 primary isolates, except for the HIV-1 clinical isolate WEJO, were obtained from the NIAID AIDS Research and Reference Reagent Program, Rockville, MD. HIV-1 recombinant clinical isolates were generated by the recombination of HIV-1 RNA RT-PR sequences from clinical samples with an RT-PR-deleted HIV-1 HXB2 proviral clone (23), which was transfected into MT4 human T-lymphoblastoid cells	The paper doesn't report if the clincal isolates were from treatment naïve or treatment experienced individuals.	Not reported
19933797	16	Which drugs were received by individuals in the study before sample sequencing?	All HIV-1 primary isolates, except for the HIV-1 clinical isolate WEJO, were obtained from the NIAID AIDS Research and Reference Reagent Program, Rockville, MD. HIV-1 recombinant clinical isolates were generated by the recombination of HIV-1 RNA RT-PR sequences from clinical samples with an RT-PR-deleted HIV-1 HXB2 proviral clone (23), which was transfected into MT4 human T-lymphoblastoid cells	The paper doesn't report if the clincal isolates were from treatment naïve or treatment experienced individuals.	Not reported
19938977	1	Does the paper report HIV sequences from patient samples?	"HIV-1 RNA measurements and drug-resistance tests were performed retrospectively for all participants in the NORA substudy Samples with HIV-1 RNA levels >1000 copies/mL at 48 weeks and baseline samples for this subset of participants were genotyped using reverse-transcription polymerase chain reaction (RT-PCR) and subsequent sequencing of a contiguous region of the pol gene."	The paper mentions that HIV-1 RNA measurements and drug-resistance tests were performed retrospectively on stored plasma samples from participants.	Yes
19938977	2	Does the paper report in vitro drug susceptibility data?	Six hundred symptomatic antiretroviral-naive human immunodeficiency virus (HIV)-infected adults (CD4 cell count, <200 cells/mm3) from 2 Ugandan centers were randomized to receive zidovudine-lamivudine plus abacavir or nevirapine. Virology was performed retrospectively on stored plasma samples at selected time points. In patients with HIV RNA levels >1000 copies/mL, the residual activity of therap…	The paper doesn't mention in vitro drug susceptiblity test were performed.	No
19938977	3	Were sequences from the paper made publicly available?	"Drug resistance sequences from this study were deposited in GenBank with reference numbers GQ409546-GQ409635."	The paper explicitly states that drug resistance sequences from this study were deposited in GenBank with reference numbers GQ409546-GQ409635.	Yes
19938977	4	What were the GenBank accession numbers for sequenced HIV isolates?	"Drug resistance sequences from this study were deposited in GenBank with reference numbers GQ409546-GQ409635."	The paper explicitly states that drug resistance sequences from this study were deposited in GenBank with reference numbers GQ409546-GQ409635.	GQ409546-GQ409635
19938977	5	How many individuals had samples obtained for HIV sequencing?	"Genotypic results were obtained for 88 samples (92%) from baseline and 89 samples (93%) from week 48 for the 96 participants with HIV RNA levels >1000 copies/mL at week 48."	The paper states that genotypic results were obtained for 88 samples from baseline and 89 samples from week 48 for the 96 participants with HIV RNA levels >1000 copies/mL at week 48.	96
19938977	6	From which countries were the sequenced samples obtained?	hundred symptomatic antiretroviral-naive human immunodeficiency virus (HIV)-infected adults (CD4 cell count, <200 cells/mm3) from 2 Ugandan centers were randomized to receive zidovudine-lamivudine plus abacavir or nevirapine. The NORA trial [4] was a 24-week randomized double-blind trial conducted at 2 centers in Uganda (Joint Clinical Research Centre, Kampala, and Medical Research Council [MRC]/…	The paper specifies that the NORA trial was conducted at two centers in Uganda: the Joint Clinical Research Centre in Kampala and the Medical Research Council/UVRI Uganda Research Unit on AIDS in Entebbe.	Uganda
19938977	7	From what years were the sequenced samples obtained?	"From January through October 2004, 600 individuals were randomized to receive abacavir (n=300) or nevirapine (n=300)."	The paper states that from January through October 2004, 600 individuals were randomized to receive abacavir or nevirapine, indicating that the samples were obtained around this period.	2004
19938977	8	Were samples cloned prior to sequencing?	An in-house sequencing method was used with a Beckman capillary sequencer at the MRC/UVRI Uganda Research Unit on AIDS and an ABI capillary sequencer at University College London. RNA was extracted from plasma (QIAamp viral RNA extraction kit; Qiagen) and reverse transcribed using 1-step RT-PCR (Qiagen). The entire protease and codons 1–320 of RT were amplified from complementary DNA by nested PCR	The paper does not mention any cloning of samples prior to sequencing.	No
19938977	9	Which HIV genes were reported to have been sequenced?	"Samples with HIV-1 RNA levels >1000 copies/mL at 48 weeks and baseline samples for this subset of participants were genotyped using reverse-transcription polymerase chain reaction (RT-PCR) and subsequent sequencing of a contiguous region of the pol gene, encompassing the whole of the protease gene and codons 1-320 of RT."	The paper mentions that the genotyping involved sequencing a contiguous region of the pol gene, encompassing the whole of the protease gene and codons 1-320 of RT.	PR, RT
19938977	10	What method was used for sequencing?	An in-house sequencing method was used with a Beckman capillary sequencer at the MRC/UVRI Uganda Research Unit on AIDS and an ABI capillary sequencer at University College London. RNA was extracted from plasma (QIAamp viral RNA extraction kit; Qiagen) and reverse transcribed using 1-step RT-PCR (Qiagen).	The paper describes the use of an in-house sequencing method with a Beckman capillary sequencer at the MRC/UVRI Uganda Research Unit on AIDS and an ABI capillary sequencer at University College London, which are indicative of Sanger sequencing.	Sanger sequencing
19938977	11	What type of samples were sequenced?	RNA was extracted from plasma (QIAamp viral RNA extraction kit; Qiagen) and reverse transcribed using 1-step RT-PCR (Qiagen). Stored plasma samples obtained at baseline and at 4, 12, 24, and 48 weeks were assayed for HIV-1 RNA at the Joint Clinical Research Centre with use of the Roche Amplicor assay for baseline samples	The paper specifies that stored plasma samples obtained at various time points were used for sequencing.	Plasma
19938977	12	Were any sequences obtained from individuals with virological failure on a treatment regimen?	Genotypic results were obtained for 88 samples (92%) from baseline and 89 samples (93%) from week 48 for the 96 participants with HIV RNA levels >1000 copies/mL at week 48. Samples with HIV-1 RNA levels >1000 copies/mL at 48 weeks and baseline samples for this subset of participants were genotyped using reverse-transcription polymerase chain reaction (RT-PCR) and subsequent sequencing of a contig…	The paper mentions that genotypic results were obtained for participants with HIV RNA levels >1000 copies/mL at week 48, which indicates virological failure on the treatment regimen.	Yes
19938977	13	Were the patients in the study in a clinical trial?	"The NORA trial was a 24-week randomized double-blind trial conducted at 2 centers in Uganda The primary DART randomization compared clinical monitoring alone with laboratory (including CD4 cell counts) and clinical monitoring.	The paper describes the NORA substudy as a randomized double-blind trial.	Yes
19938977	14	Does the paper report HIV sequences from individuals who had previously received ARV drugs?	Six hundred symptomatic antiretroviral-naive human immunodeficiency virus (HIV)-infected adults (CD4 cell count, <200 cells/mm3) from 2 Ugandan centers were randomized to receive zidovudine-lamivudine plus abacavir or nevirapine. Four participants (3 in the abacavir group and 1 in the nevirapine group) had complex mutational patterns involving NRTI and NNRTI mutations in their baseline sample, pr…	The paper mentions that the antiretroviral-naïve adults were receiving zidovudine-lamivudine plus abacavir or nevirapine, and thymidine analogue mutations and M184V mutation were determined. Which means they got sample sequence after treatment.	Yes
19938977	15	Which drug classes were received by individuals in the study before sample sequencing?	Six hundred previously untreated symptomatic HIV-infected adults who were beginning ART with CD4 cell counts <200 cells/mm3 were randomly allocated in a 1:1 ratio to receive coformulated zidovudine-lamivudine plus either (1) abacavir (300 mg) and nevirapine placebo or (2) abacavir placebo and nevirapine (200 mg), twice daily, prescribed for 24 weeks (double dummy design). After 24 weeks, particip…	Paper mentioned untreated individuals beginning ART to receive zidovudine-lamivudine, abacavir (all NRTIs), and nevirapine (NNRTI)	NRTI, NNRTI
19938977	16	Which drugs were received by individuals in the study before sample sequencing?	Six hundred previously untreated symptomatic HIV-infected adults who were beginning ART with CD4 cell counts <200 cells/mm3 were randomly allocated in a 1:1 ratio to receive coformulated zidovudine-lamivudine plus either (1) abacavir (300 mg) and nevirapine placebo or (2) abacavir placebo and nevirapine (200 mg), twice daily, prescribed for 24 weeks (double dummy design). After 24 weeks, particip…	The paper specifies that participants were randomized to receive coformulated zidovudine-lamivudine plus either abacavir aor nevirapine.	Zidovudine (AZT), Lamivudine (3TC), Abacavir (ABC), Nevirapine (NVP)
20004217	1	Does the paper report HIV sequences from patient samples?	"Pol sequences from plasma samples from 354 HIV-1-infected patients unexposed to antiretroviral therapy, according to the clinical reports, were collected."	The paper mentions that "Pol sequences from plasma samples from 354 HIV-1-infected patients unexposed to antiretroviral therapy" were collected. This indicates that the study involved sequencing HIV from patient samples.	Yes
20004217	2	Does the paper report in vitro drug susceptibility data?	This study explores: (i) the variability at resistance-related positions in 128 non-B and 226 B sequences from 354 treatment-naïve patients diagnosed in Spain (1999–2007); (ii) the discordances between five resistance interpretation algorithms (ANRS, Stanford, Rega, Geno2pheno, RIS); and (iii) the reliability of five subtyping tools (Stanford, Geno2pheno, Rega, NCBI, EuResist) for each HIV-1 vari…	The abstract discusses genotypic resistance interpretation and the use of algorithms to predict drug resistance but does not mention performing in vitro drug susceptibility tests.	No
20004217	3	Were sequences from the paper made publicly available?	"New sequences were submitted to GenBank: from FJ481650 to FJ481713 (64 non-B variants) and from FJ481714 to FJ481872 (159 subtype B)."	The paper provides specific GenBank accession numbers for the new HIV-1 sequences submitted, which are FJ481650 to FJ481713 for non-B variants and FJ481714 to FJ481872 for subtype B.	Yes
20004217	4	What were the GenBank accession numbers for sequenced HIV isolates?	"New sequences were submitted to GenBank: from FJ481650 to FJ481713 (64 non-B variants) and from FJ481714 to FJ481872 (159 subtype B)."	The paper provides specific GenBank accession numbers for the new HIV-1 sequences submitted, which are FJ481650 to FJ481713 for non-B variants and FJ481714 to FJ481872 for subtype B.	FJ481650 to FJ481713 and FJ481714 to FJ481872
20004217	5	How many individuals had samples obtained for HIV sequencing?	"Pol sequences from plasma samples from 354 HIV-1-infected patients unexposed to antiretroviral therapy, according to the clinical reports, were collected."	The paper states that pol sequences were collected from 354 HIV-1-infected patients.	354
20004217	6	From which countries were the sequenced samples obtained?	HIV-1 non-B subtypes: High transmitted NNRTI-resistance in Spain and impaired genotypic resistance interpretation due to variability. This study explores: (i) the variability at resistance-related positions in 128 non-B and 226 B sequences from 354 treatment-naïve patients diagnosed in Spain (1999–2007); (ii) the discordances between five resistance interpretation algorithms (ANRS, Stanford, Rega…	The paper mentions that the samples were collected from four Spanish.	Spain
20004217	7	From what years were the sequenced samples obtained?	"Patients were diagnosed from 1999 through 2007 in four Spanish HIV/AIDS clinics."	The paper states that the patients were diagnosed and samples were collected from 1999 through 2007.	1999-2007
20004217	8	Were samples cloned prior to sequencing?	Direct sequencing of nested PCR purified products from viral RNA was performed in the HIV-1 pol coding region.	The paper does not mention any cloning of samples prior to sequencing. It describes direct sequencing of nested PCR products.	No
20004217	9	Which HIV genes were reported to have been sequenced?	"Pol sequences included the complete protease (codons 1--99) and part of the reverse transcriptase (codons 1--247 or 1--335) using Trugene (Siemens, Barcelona, Spain) or Viroseq (Celera Diagnostics, Alameda, CA, USA) assays, respectively."	The paper specifies that sequences included the complete protease (PR) and part of the reverse transcriptase (RT) coding regions.	PR, RT
20004217	10	What method was used for sequencing?	Direct sequencing of nested PCR purified products from viral RNA was performed in the HIV-1 pol coding region. Pol sequences included the complete protease (codons 1–99) and part of the reverse transcriptase (codons 1–247 or 1–335) using Trugene (Siemens, Barcelona, Spain) or Viroseq (Celera Diagnostics, Alameda, CA, USA) assays, respectively. In some specimens with amplification difficulties, PR…	The paper mentioned direct sequencing, the use of Trugene and Viroseq assays, and ABI Prism technology, which are based on Sanger sequencing technology.	Sanger sequencing
20004217	11	What type of samples were sequenced?	Pol sequences from plasma samples from 354 HIV-1-infected patients unexposed to antiretroviral therapy, according to the clinical reports, were collected. Direct sequencing of nested PCR purified products from viral RNA was performed in the HIV-1 pol coding region.	The paper specifies that pol sequences were obtained from plasma samples of the patients.	Plasma
20004217	12	Were any sequences obtained from individuals with virological failure on a treatment regimen?	Pol sequences from plasma samples from 354 HIV-1-infected patients unexposed to antiretroviral therapy, according to the clinical reports, were collected.	The paper states that the sequences were obtained from treatment-naïve patients, meaning they had not been exposed to antiretroviral therapy.	No
20004217	13	Were the patients in the study in a clinical trial?	Pol sequences from plasma samples from 354 HIV-1-infected patients unexposed to antiretroviral therapy, according to the clinical reports, were collected. Patients were diagnosed from 1999 through 2007 in four Spanish HIV/AIDS clinics	The paper mentioned that the patients were diagnosed in clincs, which means they were not in clinical trials.	No
20004217	14	Does the paper report HIV sequences from individuals who had previously received ARV drugs?	Pol sequences from plasma samples from 354 HIV-1-infected patients unexposed to antiretroviral therapy, according to the clinical reports, were collected.	The paper specifies that the sequences were obtained from unexposed to antiretroviral therapy patients, which means treatment-naïve patients, meaning they had not been exposed to antiretroviral therapy.	No
20004217	15	Which drug classes were received by individuals in the study before sample sequencing?	Pol sequences from plasma samples from 354 HIV-1-infected patients unexposed to antiretroviral therapy, according to the clinical reports, were collected.	The paper states that the patients were treatment-naïve, meaning they had not received any antiretroviral drugs before sample sequencing.	None
20004217	16	Which drugs were received by individuals in the study before sample sequencing?	Pol sequences from plasma samples from 354 HIV-1-infected patients unexposed to antiretroviral therapy, according to the clinical reports, were collected.	The paper states that the patients were treatment-naïve, meaning they had not received any antiretroviral drugs before sample sequencing.	None
20008779	1	Does the paper report HIV sequences from patient samples?	"The prevalence of ETR RAMs in 726 antiretroviral-naïve patients infected with non-B HIV-1 subtypes was studied. In total, 726 patients from the following centers were included. Resistance-Associated Mutations to Etravirine (TMC-125) in Antiretroviral-Naïve Patients Infected with Non-B HIV-1 Subtypes▿	The paper discusses the analysis of HIV-1 sequences and RAMs from 726 antiretroviral-naïve patients infected with non-B HIV-1 subtypes.	Yes
20008779	2	Does the paper report in vitro drug susceptibility data?	Phenotypic study. Samples with at least one ETR RAM were tested for phenotypic susceptibility to nevirapine (NVP), efavirenz (EFV), and ETR. Phenotypic tests were done with a commercial phenotypic assay (Antivirogram; Virco BVBA, Mechelen, Belgium).	The paper reports in vitro drug susceptibility, phenotypic method and data.	Yes
20008779	3	Were sequences from the paper made publicly available?	No evidence	The paper does not mention any GenBank accession numbers for the sequenced HIV isolates.	No
20008779	4	What were the GenBank accession numbers for sequenced HIV isolates?	No evidence	The paper does not mention any GenBank accession numbers for the sequenced HIV isolates.	Not reported
20008779	5	How many individuals had samples obtained for HIV sequencing?	The prevalence of ETR RAMs in 726 antiretroviral-naïve patients infected with non-B HIV-1 subtypes was studied. In total, 726 patients from the following centers were included (numbers of patients from each center are indicated in parentheses): CESAC (Centre d\'Ecoute, de Soins, d\'Animation et de Conseils) in Bamako, Mali (163); Nianankoro Fomba Hospital in Ségou, Mali (118); Pitié-Salpêtrière H…	The paper states that the prevalence of ETR RAMs was studied in 726 antiretroviral-naïve patients infected with non-B HIV-1 subtypes.	726
20008779	6	From which countries were the sequenced samples obtained?	In total, 726 patients from the following centers were included (numbers of patients from each center are indicated in parentheses): CESAC (Centre d'Ecoute, de Soins, d'Animation et de Conseils) in Bamako, Mali (163); Nianankoro Fomba Hospital in Ségou, Mali (118); Pitié-Salpêtrière Hospital in Paris, France (192); Bichat Claude-Bernard Hospital in Paris, France (182); and Saint-Antoine Hospital …	The paper lists the clinical centers from which the samples were collected, including CESAC in Mali and France.	Mali, France
20008779	7	From what years were the sequenced samples obtained?	No evidence	The paper does not specify the years during which the samples were obtained.	Not reported
20008779	8	Were samples cloned prior to sequencing?	In most cases, nucleotide sequence analyses of the pol gene were performed in the participating centers using the centers’ own individual protocols. Samples from CESAC in Bamako and the Nianankoro Fomba Hospital in Ségou were sequenced in Paris at the Pitié-Salpêtrière Hospital. To ensure the quality of the data, each submitted sequence was checked before inclusion.	The paper does not mention any process of cloning the samples prior to sequencing.	Not reported
20008779	9	Which HIV genes were reported to have been sequenced?	In most cases, nucleotide sequence analyses of the pol gene were performed in the participating centers using the centers’ own individual protocols. Samples from CESAC in Bamako and the Nianankoro Fomba Hospital in Ségou were sequenced in Paris at the Pitié-Salpêtrière Hospital. To ensure the quality of the data, each submitted sequence was checked before inclusion. The RT sequences contained at …	The paper mentions that nucleotide sequence analyses of the pol gene were performed, and it specifically refers to the RT sequences containing at least 15 to 240 amino acids.	RT
20008779	10	What method was used for sequencing?	In most cases, nucleotide sequence analyses of the pol gene were performed in the participating centers using the centers’ own individual protocols. Samples from CESAC in Bamako and the Nianankoro Fomba Hospital in Ségou were sequenced in Paris at the Pitié-Salpêtrière Hospital. To ensure the quality of the data, each submitted sequence was checked before inclusion.	The paper mentions that nucleotide sequence analyses were performed using the centers' own individual protocols but does not detail whether Sanger sequencing, Illumina sequencing, or another method was used.	Not reported
20008779	11	What type of samples were sequenced?	No evidence	The paper does not specify the type of clinical specimens that were sequenced, such as plasma, PBMC, whole blood, or serum.	Not reported
20008779	12	Were any sequences obtained from individuals with virological failure on a treatment regimen?	Resistance-Associated Mutations to Etravirine (TMC-125) in Antiretroviral-Naïve Patients Infected with Non-B HIV-1 Subtypes. HIV-1-seropositive individuals were eligible for this study if they had never been exposed to antiretroviral drugs before the time of sampling. Among the 726 analyzed sequences from patients who never received antiretroviral treatment.	The paper specifically included antiretroviral-naïve patients, meaning they had never been exposed to antiretroviral drugs before the time of sampling, no virological failure	No
20008779	13	Were the patients in the study in a clinical trial?	The present study included patients who were infected with non-B HIV-1 subtypes and were monitored in different clinical centers. HIV-1-seropositive individuals were eligible for this study if they had never been exposed to antiretroviral drugs before the time of sampling.	The paper mentioned that the patients were monitored in different clinical centers, which means they were not in a clinical trial	No
20008779	14	Does the paper report HIV sequences from individuals who had previously received ARV drugs?	Resistance-Associated Mutations to Etravirine (TMC-125) in Antiretroviral-Naïve Patients Infected with Non-B HIV-1 Subtypes. HIV-1-seropositive individuals were eligible for this study if they had never been exposed to antiretroviral drugs before the time of sampling. Among the 726 analyzed sequences from patients who never received antiretroviral treatment.	The paper specifically included antiretroviral-naïve patients who never received antiretroviral treatment before the time of sampling.	No
20008779	15	Which drug classes were received by individuals in the study before sample sequencing?	Resistance-Associated Mutations to Etravirine (TMC-125) in Antiretroviral-Naïve Patients Infected with Non-B HIV-1 Subtypes. HIV-1-seropositive individuals were eligible for this study if they had never been exposed to antiretroviral drugs before the time of sampling. Among the 726 analyzed sequences from patients who never received antiretroviral treatment.	The paper included antiretroviral-naïve patients, meaning they had never been exposed to any antiretroviral drugs before the time of sampling.	None
20008779	16	Which drugs were received by individuals in the study before sample sequencing?	Resistance-Associated Mutations to Etravirine (TMC-125) in Antiretroviral-Naïve Patients Infected with Non-B HIV-1 Subtypes. HIV-1-seropositive individuals were eligible for this study if they had never been exposed to antiretroviral drugs before the time of sampling. Among the 726 analyzed sequences from patients who never received antiretroviral treatment.	The paper included antiretroviral-naïve patients, meaning they had never been exposed to any antiretroviral drugs before the time of sampling.	None
20029816	1	Does the paper report HIV sequences from patient samples?	HIV-1 Reverse Transcriptase Drug-Resistance Mutations in Chronically Infected Individuals Receiving or Naïve to HAART in Cameroon. To examine the efficacy of these drugs in Cameroon, where diverse non-B HIV-1 subtypes and recombinant viruses predominate, the reverse transcriptase (RT) viral sequences in patient plasma were analyzed for the presence of mutations that confer drug resistance. Forty-…	The paper mentions that HIV-1-positive individuals' plasma samples were analyzed for the presence of mutations that confer drug resistance. This indicates that the study involved sequencing HIV sequences from patient samples.	Yes
20029816	2	Does the paper report in vitro drug susceptibility data?	To examine the efficacy of these drugs in Cameroon, where diverse non-B HIV-1 subtypes and recombinant viruses predominate, the reverse transcriptase (RT) viral sequences in patient plasma were analyzed for the presence of mutations that confer drug resistance. Forty-nine HIV-1-positive individuals were randomly selected from those receiving care in HIV/AIDS outpatient clinics in the South-West a…	The paper doest not mention in vitro drug susceptibility data or phenotypic data. It mentions clinical isolates and sequencing of plasma samples.	No
20029816	3	Were sequences from the paper made publicly available?	"The DNA sequences of the HIV-1 RT region of Pol that were determined in this study were submitted to GenBank under the following accession numbers: GQ344955-GQ345003."	The paper explicitly states that the DNA sequences of the HIV-1 RT region of Pol determined in the study were submitted to GenBank under the accession numbers GQ344955-GQ345003.	Yes
20029816	4	What were the GenBank accession numbers for sequenced HIV isolates?	"The DNA sequences of the HIV-1 RT region of Pol that were determined in this study were submitted to GenBank under the following accession numbers: GQ344955-GQ345003."	The paper explicitly states that the DNA sequences of the HIV-1 RT region of Pol determined in the study were submitted to GenBank under the accession numbers GQ344955-GQ345003.	GQ344955-GQ345003
20029816	5	How many individuals had samples obtained for HIV sequencing?	The samples analyzed in this study are part of a larger study aimed at analyzing the HIV-1 genetic diversity of infected individuals in Cameroon. Thus, 49 plasma samples were selected at random from HIV-1-positive individuals attending and/or receiving ARV therapy in clinics in the South-West and North-West Regions.	The paper mentioned 49 plasma samples were selected for analyzing genetic diversity, hence 49.	49
20029816	6	From which countries were the sequenced samples obtained?	HIV-1 Reverse Transcriptase Drug-Resistance Mutations in Chronically Infected Individuals Receiving or Naïve to HAART in Cameroon. The samples analyzed in this study are part of a larger study aimed at analyzing the HIV-1 genetic diversity of infected individuals in Cameroon.	The paper clearly states that the study was conducted in Cameroon.	Cameroon
20029816	7	From what years were the sequenced samples obtained?	The specimens used were obtained from these individuals in calendar years 2006 and 2007	Paper explicitly mentioned specimens collected 2006 and 2007	2006;2007
20029816	8	Were samples cloned prior to sequencing?	Direct sequencing of the 5′ and 3′ ends of the purified PCR amplicons were performed with the two nested primers RTPOLF2 and RTPOLR2, and primer walking using the ABI Big Dye Terminator cycle sequencing chemistry on an ABI 3730XL instrument.	The paper describes direct sequencing of PCR amplicons, which means samples were not cloned	No
20029816	9	Which HIV genes were reported to have been sequenced?	"To examine the efficacy of these drugs in Cameroon, where diverse non-B HIV-1 subtypes and recombinant viruses predominate, the reverse transcriptase (RT) viral sequences in patient plasma were analyzed for the presence of mutations that confer drug resistance. A 1,596-bp region of the pol gene, covering the RT (p51) and most of the RNase H (p15) was amplified from the extracted RNA using nested…	The paper specifically mentions that the reverse transcriptase (RT) viral sequences in patient plasma were analyzed for the presence of mutations that confer drug resistance. Additionally, it mentions the amplification and sequencing of the RT gene.	RT
20029816	10	What method was used for sequencing?	Direct sequencing of the 5′ and 3′ ends of the purified PCR amplicons were performed with the two nested primers RTPOLF2 and RTPOLR2, and primer walking using the ABI Big Dye Terminator cycle sequencing chemistry on an ABI 3730XL instrument.	The paper describes the use of ABI Big Dye Terminator cycle sequencing chemistry on an ABI 3730XL instrument, which is a method associated with Sanger sequencing.	Sanger sequencing
20029816	11	What type of samples were sequenced?	49 plasma samples were selected at random from HIV-1-positive individuals attending and/or receiving ARV therapy in clinics in the South-West and North-West Regions. Viral RNA extraction from the participant's plasma was performed using the QIAamp Viral RNA Mini kit. To examine the efficacy of these drugs in Cameroon, where diverse non-B HIV-1 subtypes and recombinant viruses predominate, the rev…	The paper specifies that plasma samples from HIV-1-positive individuals were used for sequencing.	Plasma
20029816	12	Were any sequences obtained from individuals with virological failure on a treatment regimen?	Among the 28 patients receiving HAART, 39% (11/28) had resistance to NRTIs, and 46% (13/28) to NNRTIs after a median of 12 months from the start of therapy. The current study reveals a high level of drug resistance among patients receiving HAART and drug-naïve individuals in Cameroon, demonstrated by 46% of the study individuals who were on HAART for a median period of 12 months harbored genotypi…	The paper mentions that among the 28 patients receiving HAART, a significant proportion had resistance to NRTIs and NNRTIs, indicating virological failure.	Yes
20029816	13	Were the patients in the study in a clinical trial?	The samples analyzed in this study are part of a larger study aimed at analyzing the HIV-1 genetic diversity of infected individuals in Cameroon.	The paper does not mention that the patients were part of a clinical trial. It describes the study as part of a larger effort to analyze HIV-1 genetic diversity in Cameroon.	No
20029816	14	Does the paper report HIV sequences from individuals who had previously received ARV drugs?	Among the 28 patients receiving HAART, 39% (11/28) had resistance to NRTIs, and 46% (13/28) to NNRTIs after a median of 12 months from the start of therapy. The current study reveals a high level of drug resistance among patients receiving HAART and drug-naïve individuals in Cameroon, demonstrated by 46% of the study individuals who were on HAART for a median period of 12 months harbored genotypi…	The paper mentions that among the 28 patients receiving HAART, a significant proportion had resistance to NRTIs and NNRTIs, indicating that these individuals had previously received ARV drugs.	Yes
20029816	15	Which drug classes were received by individuals in the study before sample sequencing?	Among the treated individuals (n = 28), the average number of months on HAART prior to inclusion in the study was 13.7 (median = 12 months), and 79% were receiving the FDC Triomune (3TC/d4T/NVP). The remaining six individuals were prescribed either a combination of lamivudine and stavudine (3TC/d4T; n = 1), lamivudine and nevirapine (3TC/NVP; n = 2), Duovir and Stocrin (3TC/AZT and EFV; n = 2), o…	The paper lists the specific drugs that were part of the treatment regimens for the individuals in the study, including lamivudine, stavudine, nevirapine, zidovudine, and efavirenz, which includes both NRTI and NNRTI.	NRTI, NNRTI
20029816	16	Which drugs were received by individuals in the study before sample sequencing?	Among the treated individuals (n = 28), the average number of months on HAART prior to inclusion in the study was 13.7 (median = 12 months), and 79% were receiving the FDC Triomune (3TC/d4T/NVP). The remaining six individuals were prescribed either a combination of lamivudine and stavudine (3TC/d4T; n = 1), lamivudine and nevirapine (3TC/NVP; n = 2), Duovir and Stocrin (3TC/AZT and EFV; n = 2), o…	The paper lists the specific drugs that were part of the treatment regimens for the individuals in the study, including lamivudine, stavudine, nevirapine, zidovudine, and efavirenz.	Lamivudine (3TC), Stavudine (d4T), Nevirapine (NVP), Zidovudine (AZT), Efavirenz (EFV)
20104106	1	Does the paper report HIV sequences from patient samples?	"Two hundred eight HIV-1-positive subjects from all major cities in Liaoning province were recruited between 2000 and 2008. 2.6 kilobase gag-pol sequences were amplified from plasma viral RNA and sequenced directly."	The paper mentions that HIV-1-positive subjects were recruited, and sequences were obtained from plasma viral RNA. This indicates that the study involved patient samples.	Yes
20104106	2	Does the paper report in vitro drug susceptibility data?	Two hundred eight HIV-1-positive subjects from all major cities in Liaoning province were recruited between 2000 and 2008. 2.6 kilobase gag-pol sequences were amplified from plasma viral RNA and sequenced directly. The HIV-1 sequences obtained were analyzed using phylogenetic and recombinant approaches.	The paper does not mention in vitro drug susceptibility data or phenotypic data. The study focuses on sequencing of clinical samples.	No
20104106	3	Were sequences from the paper made publicly available?	Nucleotide Sequence Accession Numbers. The Genbank accession numbers of nucleotide sequences reported in this article are EF122502-EF122594, AY548279, and FJ531381-FJ531481."	The paper provides specific GenBank accession numbers for the nucleotide sequences reported in the study.	Yes
20104106	4	What were the GenBank accession numbers for sequenced HIV isolates?	Nucleotide Sequence Accession Numbers. The Genbank accession numbers of nucleotide sequences reported in this article are EF122502-EF122594, AY548279, and FJ531381-FJ531481."	The paper provides specific GenBank accession numbers for the nucleotide sequences reported in the study.	EF122502-EF122594, AY548279, FJ531381-FJ531481
20104106	5	How many individuals had samples obtained for HIV sequencing?	"Two hundred eight HIV-1-positive subjects from all major cities in Liaoning province were recruited between 2000 and 2008."	The paper states that a total of 208 HIV-1-positive subjects were recruited for the study.	208
20104106	6	From which countries were the sequenced samples obtained?	Genetic and Epidemiologic Characterization of HIV-1 Infection In Liaoning Province, China. A total of 208 HIV-1-positive subjects from all major cities in Liaoning province were recruited between 2000 and 2008 by the First Affiliated Hospital China Medical University in Shenyang, Liaoning Province, in northeastern China.	The study was conducted in Liaoning province, China, and all the subjects were recruited from various cities within this province.	China
20104106	7	From what years were the sequenced samples obtained?	A total of 208 HIV-1‚Äìpositive subjects from all major cities in Liaoning province were recruited between 2000 and 2008 by the First Affiliated Hospital China Medical University in Shenyang, Liaoning Province, in northeastern China.	The study subjects were "recruited between 2000 and 2008"	2000-2008
20104106	8	Were samples cloned prior to sequencing?	The nucleotide sequence of the 2.6 kilobase gag reverse transcriptase (RT) gene (nucleotide position relative to HXB2 genome: 790-3421) was determined by direct sequencing (ABI PRISM. 3130 Genetic Analyzer, Applied Biosystems, Foster City, CA). 2.6 kilobase gag-pol sequences were amplified from plasma viral RNA and sequenced directly	The paper mentions that sequences were obtained directly from plasma viral RNA, which means not cloned.	No
20104106	9	Which HIV genes were reported to have been sequenced?	"The nucleotide sequence of the 2.6 kilobase gag reverse transcriptase (RT) gene (nucleotide position relative to HXB2 genome: 790-3421) was determined by direct sequencing."	The paper mentions that the nucleotide sequence of the 2.6 kilobase gag reverse transcriptase (RT) gene was determined by direct sequencing.	Gag, RT
20104106	10	What method was used for sequencing?	The nucleotide sequence of the 2.6 kilobase gag reverse transcriptase (RT) gene (nucleotide position relative to HXB2 genome: 790-3421) was determined by direct sequencing (ABI PRISM. 3130 Genetic Analyzer, Applied Biosystems, Foster City, CA).	The paper mentions that the nucleotide sequence was determined by direct sequencing using an ABI PRISM 3130 Genetic Analyzer, which is a method associated with Sanger sequencing.	Sanger sequencing
20104106	11	What type of samples were sequenced?	2.6 kilobase gag-pol sequences were amplified from plasma viral RNA and sequenced directly. HIV-1 RNA was extracted from plasma by a column purification method (QIAamp. Viral RNA Mini Kit; Qiagen, Hilden, Germany).	The paper specifies that HIV-1 RNA was extracted from plasma viral RNA for sequencing.	Plasma
20104106	12	Were any sequences obtained from individuals with virological failure on a treatment regimen?	All patients were treatment-naive at the point of sample collection	The paper states that all patients were treatment-naive at the point of sample collection, indicating that none of the sequences were obtained from individuals with virological failure on a treatment regimen.	No
20104106	13	Were the patients in the study in a clinical trial?	Two hundred eight HIV-1-positive subjects from all major cities in Liaoning province were recruited between 2000 and 2008. A total of 208 HIV-1-positive subjects from all major cities in Liaoning province were recruited between 2000 and 2008 by the First Affiliated Hospital China Medical University in Shenyang, Liaoning Province, in northeastern China.	The pape mentions the recruitment of subjects from various cities for epidemiologic and genetic studies, it didn't mention clinical trial.	No
20104106	14	Does the paper report HIV sequences from individuals who had previously received ARV drugs?	All patients were treatment-naive at the point of sample collection	The paper states that all patients were treatment-naive at the point of sample collection.	No
20104106	15	Which drug classes were received by individuals in the study before sample sequencing?	All patients were treatment-naive at the point of sample collection	The paper states that all patients were treatment-naive at the point of sample collection, indicating that they had not received any drug classes before sample sequencing.	None
20104106	16	Which drugs were received by individuals in the study before sample sequencing?	All patients were treatment-naive at the point of sample collection	The paper states that all patients were treatment-naive at the point of sample collection, indicating that they had not received any drugs before sample sequencing.	None
20124001	1	Does the paper report HIV sequences from patient samples?	"HIV-1 RT sequences were analyzed in 364 antiretroviral treatment-naïve infected individuals who visited the outpatient clinic of the AIDS Clinical Center, International Medical Center of Japan, in 2007 and 2008 and gave written informed consent to this study. Clinical HIV-1 isolates were obtained using MAGIC-5 cells (CCR5- and CD4-expressing HeLa-LTR-β-D-gal cells) from fresh plasma samples coll…	The paper mentions that HIV-1 RT sequences were analyzed in 364 antiretroviral treatment-naïve infected individuals who visited the outpatient clinic. Additionally, clinical HIV-1 isolates were obtained from fresh plasma samples collected from seven of these treatment-naïve patients.	Yes
20124001	2	Does the paper report in vitro drug susceptibility data?	Analysis of clinical isolates showed comparable drug susceptibilities, and the same combination of mutations was found in some database patients who experienced virologic NNRTI-based treatment failure. Drug susceptibility assay. EFV, NVP, and ETV were generously provided by Merck Co., Inc. (Rahway, NJ), Boehringer Ingelheim Pharmaceutics Inc. (Ridgefield, CT), and Tibotec Pharmaceuticals (Little …	The paper mentions drug susceiptiblity assay and was used to determine drug suceptibility.	Yes
20124001	3	Were sequences from the paper made publicly available?	In a previous study, Tee et al. ( 29 ) analyzed HIV-1 RT and protease sequences in 36 antiretroviral-treated patients with detectable viral loads but they could not find any known resistance-associated mutation in 8 patients. In one of their patients on EFV treatment (04MYKL1665), V106I and V179D coexisted in the HIV-1 RT according to GenBank (accession no. AY960901 ; accessed in October 2009). I…	The GenBank accession numbers (AY960901 and DQ880530) mentioned in the provided text are explicitly cited as being from a previous study by Tee et al. and a clinical trial of tipranavir. This is the only place in the entire paper where Genbank Accession Numbers are mentioned, with no other data availability claims, hence there are no Genbank Accession numbers directly reported by this paper.	No
20124001	4	What were the GenBank accession numbers for sequenced HIV isolates?	In a previous study, Tee et al. ( 29 ) analyzed HIV-1 RT and protease sequences in 36 antiretroviral-treated patients with detectable viral loads but they could not find any known resistance-associated mutation in 8 patients. In one of their patients on EFV treatment (04MYKL1665), V106I and V179D coexisted in the HIV-1 RT according to GenBank (accession no. AY960901 ; accessed in October 2009). I…	The GenBank accession numbers (AY960901 and DQ880530) mentioned in the provided text are explicitly cited as being from a previous study by Tee et al. and a clinical trial of tipranavir. This is the only place in the entire paper where Genbank Accession Numbers are mentioned, with no other data availability claims, hence there are no Genbank Accession numbers directly reported by this paper.	Not reported
20124001	5	How many individuals had samples obtained for HIV sequencing?	"HIV-1 RT sequences were analyzed in 364 antiretroviral treatment-naïve infected individuals who visited the outpatient clinic of the AIDS Clinical Center, International Medical Center of Japan, in 2007 and 2008 and gave written informed consent to this study."	The paper states that HIV-1 RT sequences were analyzed in 364 antiretroviral treatment-naïve infected individuals.	364
20124001	6	From which countries were the sequenced samples obtained?	HIV-1 RT sequences were analyzed in 364 antiretroviral treatment-naïve infected individuals who visited the outpatient clinic of the AIDS Clinical Center, International Medical Center of Japan, in 2007 and 2008 and gave written informed consent to this study.	The paper states that the HIV-1 RT sequences were analyzed in individuals who visited the outpatient clinic of the AIDS Clinical Center, International Medical Center of Japan.	Japan
20124001	7	From what years were the sequenced samples obtained?	"HIV-1 RT sequences were analyzed in 364 antiretroviral treatment-naïve infected individuals who visited the outpatient clinic of the AIDS Clinical Center, International Medical Center of Japan, in 2007 and 2008."	The paper mentions that the HIV-1 RT sequences were analyzed in individuals who visited the outpatient clinic in 2007 and 2008.	2007-2008
20124001	8	Were samples cloned prior to sequencing?	Direct sequencing was performed using dye terminators, and the HIV-1 subtypes of the sequences obtained were determined by the neighbor-joining method.	The paper describes direct sequencing of the HIV-1 sequences, which means not cloned before.	No
20124001	9	Which HIV genes were reported to have been sequenced?	"HIV-1 RT sequences were analyzed in 364 antiretroviral treatment-naïve infected individuals. The HIV-1 RT coding region was amplified by RT-PCR and nested PCR using previously published primer pairs. The proviral HIV-1 RT coding region in infected MT-2 cells was amplified and sequenced at several passages."	The paper specifically mentions the sequencing of the HIV-1 RT coding region in various sections, including the analysis of NNRTI resistance-associated mutations and the generation of recombinant HIV-1 strains.	RT
20124001	10	What method was used for sequencing?	Direct sequencing was performed using dye terminators, and the HIV-1 subtypes of the sequences obtained were determined by the neighbor-joining method.	The paper describes the use of direct sequencing with dye terminators, which is a method associated with Sanger sequencing.	Sanger sequencing
20124001	11	What type of samples were sequenced?	Viral RNA was extracted from stocked plasma samples, and the HIV-1 RT coding region was amplified by RT-PCR and nested PCR using previously published primer pairs. Clinical HIV-1 isolates were obtained using MAGIC-5 cells (CCR5- and CD4-expressing HeLa-LTR-β-D-gal cells) from fresh plasma samples collected from seven of the above-mentioned treatment-naïve patients and stored at −80°C until use	The paper mentions that viral RNA was extracted from stocked plasma samples and that clinical HIV-1 isolates were obtained from fresh plasma samples.	Plasma
20124001	12	Were any sequences obtained from individuals with virological failure on a treatment regimen?	Analysis of clinical isolates showed comparable drug susceptibilities, and the same combination of mutations was found in some database patients who experienced virologic NNRTI-based treatment failure. HIV-1 RT sequences were analyzed in 364 antiretroviral treatment-naïve infected individuals who visited the outpatient clinic of the AIDS Clinical Center, International Medical Center of Japan, in …	The paper mentions that the sequences werefrom 364 antiretroviral-naïve invididuals, although the word treatment failure was mentioned, its not abou these sequence samples but from a database.	No
20124001	13	Were the patients in the study in a clinical trial?	HIV-1 RT sequences were analyzed in 364 antiretroviral treatment-naïve infected individuals who visited the outpatient clinic of the AIDS Clinical Center, International Medical Center of Japan, in 2007 and 2008 and gave written informed consent to this study.	The paper does not mention that the patients were part of a clinical trial. It describes the analysis of HIV-1 RT sequences from treatment-naïve individuals who visited the outpatient clinic.	No
20124001	14	Does the paper report HIV sequences from individuals who had previously received ARV drugs?	HIV-1 RT sequences were analyzed in 364 antiretroviral treatment-naïve infected individuals who visited the outpatient clinic of the AIDS Clinical Center, International Medical Center of Japan, in 2007 and 2008 and gave written informed consent to this study.	The paper specifically mentions that the HIV-1 RT sequences were analyzed in antiretroviral treatment-naïve infected individuals.	No
20124001	15	Which drug classes were received by individuals in the study before sample sequencing?	HIV-1 RT sequences were analyzed in 364 antiretroviral treatment-naïve infected individuals who visited the outpatient clinic of the AIDS Clinical Center, International Medical Center of Japan, in 2007 and 2008 and gave written informed consent to this study.	The paper focuses on antiretroviral treatment-naïve individuals, so no drug classes were received by these individuals before sample sequencing.	None
20124001	16	Which drugs were received by individuals in the study before sample sequencing?	HIV-1 RT sequences were analyzed in 364 antiretroviral treatment-naïve infected individuals who visited the outpatient clinic of the AIDS Clinical Center, International Medical Center of Japan, in 2007 and 2008 and gave written informed consent to this study.	The paper focuses on antiretroviral treatment-naïve individuals, so no specific drugs were received by these individuals before sample sequencing.	None
20300008	1	Does the paper report HIV sequences from patient samples?	"Genotypic resistance measurements were performed using the GeneSeqR Integrase assay, in which patient-derived integrase coding sequences were determined using conventional dye-deoxy chain terminator chemistry (ABI, Foster City, CA)."	The paper mentions that integrase sequences were determined using patient-derived integrase coding sequences, indicating that HIV sequences from patient samples were reported.	Yes
20300008	2	Does the paper report in vitro drug susceptibility data?	"Phenotypic susceptibility to raltegravir was determined using PhenoSense® Integrase. Briefly, integrase sequences were amplified from patient plasma by RT-PCR and transferred into a resistance test vector containing a luciferase reporter gene. Pseudotyped virus containing patient-derived integrase was used to infect HEK293 cells in the presence and absence of serial dilutions of raltegravir. Sus…	The paper describes phenotypic susceptibility testing to raltegravir, which involves measuring the fold-change in IC50 of the sample virus compared to a reference strain, indicating in vitro drug susceptibility data. The PhenoSense assay is a common in vitro assay used to determine drug susceptibility, indicating in vitro susceptability experiments.	Yes
20300008	3	Were sequences from the paper made publicly available?	"Integrase sequences have been submitted to GenBank (GU121677-GU121818)."	The paper explicitly states that the sequences described have been submitted to GenBank under reference numbers GU121677 to GU121818.	Yes
20300008	4	What were the GenBank accession numbers for sequenced HIV isolates?	"Integrase sequences have been submitted to GenBank (GU121677-GU121818)."	The paper explicitly states that the sequences described have been submitted to GenBank under reference numbers GU121677 to GU121818.	GU121677 to GU121818
20300008	5	How many individuals had samples obtained for HIV sequencing?	We identified 29 individuals who exhibited evidence of incomplete viral suppression on a regimen containing an integrase inhibitor (23 raltegravir, 6 elvitegravir).	The paper states that 29 individuals exhibited evidence of incomplete viral suppression on a regimen containing an integrase inhibitor and were included in the failure analyses, indicating that samples were obtained from these individuals for sequencing.	29
20300008	6	From which countries were the sequenced samples obtained?	All subjects were enrolled in an ongoing, observational cohort based in San Francisco (SCOPE cohort)."	The study participants were enrolled in the SCOPE cohort based in San Francisco, indicating that the sequenced samples were obtained from the United States.	United States
20300008	7	From what years were the sequenced samples obtained?	No evidence	The paper does not provide specific years during which the sequenced samples were obtained.	Not reported
20300008	8	Were samples cloned prior to sequencing?	Genotypic resistance measurements were performed using the GeneSeqR Integrase assay, in which patient-derived integrase coding sequences were determined using conventional dye-deoxy chain terminator chemistry (ABI, Foster City, CA)	The paper does not mention that samples were cloned prior to sequencing.	No
20300008	9	Which HIV genes were reported to have been sequenced?	"Genotypic resistance measurements were performed using the GeneSeqR Integrase assay, in which patient-derived integrase coding sequences were determined using conventional dye-deoxy chain terminator chemistry (ABI, Foster City, CA)."	The paper focuses on integrase inhibitor resistance and mentions that integrase coding sequences were determined, indicating that the integrase gene was sequenced.	IN
20300008	10	What method was used for sequencing?	Genotypic resistance measurements were performed using the GeneSeqR Integrase assay, in which patient-derived integrase coding sequences were determined using conventional dye-deoxy chain terminator chemistry (ABI, Foster City, CA)	The paper mentions that genotypic resistance measurements were performed using conventional dye-deoxy chain terminator chemistry, which is a method used in Sanger sequencing.	Sanger sequencing
20300008	11	What type of samples were sequenced?	All subjects were enrolled in an ongoing, observational cohort based in San Francisco (SCOPE cohort). Subjects who received an integrase inhibitor (raltegravir or elvitegravir) were identified. Subjects enrolled in SCOPE are typically seen every four months. At each visit, an extensive interview is performed and plasma and other biologic specimens are obtained and stored. integrase sequences were…	The paper mentions that integrase sequences were amplified from patient plasma, indicating that plasma was the clinical specimen sequenced.	Plasma
20300008	12	Were any sequences obtained from individuals with virological failure on a treatment regimen?	"We identified 29 individuals who exhibited evidence of incomplete viral suppression on a regimen containing an integrase inhibitor (23 raltegravir, 6 elvitegravir)."	The paper discusses sequences obtained from individuals who exhibited incomplete viral suppression on an integrase inhibitor-based regimen, indicating virological failure.	Yes
20300008	13	Were the patients in the study in a clinical trial?	We also identified six subjects who were participants in a phase II study of elvitegravir	The paper mentions that six subjects were participants in a phase II study of elvitegravir, indicating that they were in a clinical trial.	Yes
20300008	14	Does the paper report HIV sequences from individuals who had previously received ARV drugs?	We identified 29 individuals who exhibited evidence of incomplete viral suppression on a regimen containing an integrase inhibitor (23 raltegravir, 6 elvitegravir). Among the 79 subjects who initiated an integrase inhibitor based regimen, 50 had evidence of durable viral suppression. The cohort was highly treatment-experienced and was followed for a median 15.8 months.	The paper mentions that the cohort was on a regimen containing an integrase inhibitor and highly treatment-experienced, indicating that the individuals had previously received ARV drugs.	Yes
20300008	15	Which drug classes were received by individuals in the study before sample sequencing?	We identified 29 individuals who exhibited evidence of incomplete viral suppression on a regimen containing an integrase inhibitor (23 raltegravir, 6 elvitegravir).	The paper specifically mentions that the individuals received raltegravir or elvitegravir as part of their integrase inhibitor-based regimen, which are integrase inhibitors.	INSTI
20300008	16	Which drugs were received by individuals in the study before sample sequencing?	We identified 29 individuals who exhibited evidence of incomplete viral suppression on a regimen containing an integrase inhibitor (23 raltegravir, 6 elvitegravir).	The paper specifically mentions that the individuals received raltegravir or elvitegravir as part of their integrase inhibitor-based regimen.	Raltegravir (RAL), Elvitegravir (EVG)
20308382	1	Does the paper report HIV sequences from patient samples?	"We generated 31 recombinant viruses containing the entire *gag* and protease genes from 31 plasma samples from HIV-1-infected patients with ( *n* = 21) or without ( *n* = 10) prior ARV experience. Thirty-one plasma samples from ARV treatment-experienced or -naïve patients were used to generate the virus isolates. Phenotypic Susceptibility to Bevirimat in Isolates from HIV-1-Infected Patients wit…	The paper mentions that 31 recombinant viruses containing the entire gag and protease genes were generated from 31 plasma samples from HIV-1-infected patients. This indicates that HIV sequences were obtained from patient samples.	Yes
20308382	2	Does the paper report in vitro drug susceptibility data?	We investigated the impact of prior antiretroviral (ARV) treatment and/or natural genetic diversity on BVM susceptibility by conducting in vitro phenotypic analyses of viruses made from patient samples. The aim of the present study was to investigate the phenotypic susceptibility to BVM of HIV-1 isolates from HIV-1-infected patients who had not previously been exposed to BVM, in order to shed lig…	The paper describes conducting in vitro phenotypic analyses of viruses made from patient samples to investigate the impact of prior antiretroviral treatment and/or natural genetic diversity on BVM susceptibility. It also mentions the use of phenotypic assays to measure the susceptibilities of the mutant viruses to bevirimat, tenofovir, lopinavir, and atazanavir.	Yes
20308382	3	Were sequences from the paper made publicly available?	"The sequences described here have been submitted to GenBank under reference numbers HM116810 to HM116840."	The paper explicitly states that the sequences described have been submitted to GenBank under reference numbers HM116810 to HM116840.	Yes
20308382	4	What were the GenBank accession numbers for sequenced HIV isolates?	"The sequences described here have been submitted to GenBank under reference numbers HM116810 to HM116840."	The paper explicitly states that the sequences described have been submitted to GenBank under reference numbers HM116810 to HM116840.	HM116810 to HM116840
20308382	5	How many individuals had samples obtained for HIV sequencing?	"We generated 31 recombinant viruses containing the entire *gag* and protease genes from 31 plasma samples from HIV-1-infected patients with ( *n* = 21) or without ( *n* = 10) prior ARV experience. Thirty-one plasma samples from ARV treatment-experienced or -naïve patients were used to generate the virus isolates."	The paper states that 31 plasma samples from HIV-1-infected patients were used to generate the virus isolates, indicating that samples were obtained from 31 individuals.	31
20308382	6	From which countries were the sequenced samples obtained?	Patient isolates. Thirty-one plasma samples from ARV treatment-experienced or -naïve patients were used to generate the virus isolates. None of the subjects chosen had been exposed to BVM. Ten samples from ARV-naïve patients from study GS-01-934 (collected between August 2003 and September 2003) without any resistance mutations in protease or RT were randomly selected. Twenty-one samples from ARV…	The paper mentions some sample were from study GS-US-183-0105, which indicates these samples were from United States.	United States
20308382	7	From what years were the sequenced samples obtained?	"Ten samples from ARV-naïve patients from study GS-01-934 (collected between August 2003 and September 2003) without any resistance mutations in protease or RT were randomly selected. Eleven of these samples were from ARV-experienced patients enrolled in study GS-99-907 (collected between February 2000 and July 2000), and the remaining 10 samples were from ARV-experienced patients enrolled in stu…	The paper provides specific collection dates for the samples used in the study. Samples from ARV-naïve patients were collected between August 2003 and September 2003, while samples from ARV-experienced patients were collected between February 2000 and July 2000, and between March 2006 and May 2006.	2000, 2003, 2006
20308382	8	Were samples cloned prior to sequencing?	No evidence	The paper doesn't mention the sequence samples were cloned.	No
20308382	9	Which HIV genes were reported to have been sequenced?	"We generated 31 recombinant viruses containing the entire *gag* and protease genes from 31 plasma samples from HIV-1-infected patients with ( *n* = 21) or without ( *n* = 10) prior ARV experience. The approximately 1.8-kb PCR end product containing the entire HIV *gag* and *protease* genes from the clinical samples was purified by agarose gel electrophoresis (Qiagen)."	The paper mentions that the entire gag and protease genes from the patient samples were sequenced and analyzed.	Gag, PR
20308382	10	What method was used for sequencing?	The polyclonal plasmid DNA was sequenced (Elim Biopharmaceuticals, Hayward, CA) and used for virus production.	The paper mentions that the polyclonal plasmid DNA was sequenced by Elim Biopharmaceuticals, which is known for using Sanger sequencing methods.	Sanger sequencing
20308382	11	What type of samples were sequenced?	Thirty-one plasma samples from ARV treatment-experienced or -naïve patients were used to generate the virus isolates. None of the subjects chosen had been exposed to BVM.	The paper specifies that 31 plasma samples from ARV treatment-experienced or -naïve patients were used to generate the virus isolates.	Plasma
20308382	12	Were any sequences obtained from individuals with virological failure on a treatment regimen?	Twenty-one samples from ARV-experienced patients were selected from two different past Gilead studies in order to capture a snapshot of patient susceptibility to bevirimat at two different time periods. Eleven of these samples were from ARV-experienced patients enrolled in study GS-99-907 (collected between February 2000 and July 2000), and the remaining 10 samples were from ARV-experienced patie…	The paper mentions that 21 samples were from ARV-experienced patients, but doesn't mention if they were with virlogical failure.	Not reported
20308382	13	Were the patients in the study in a clinical trial?	Thirty-one plasma samples from ARV treatment-experienced or -naïve patients were used to generate the virus isolates. None of the subjects chosen had been exposed to BVM. Ten samples from ARV-naïve patients from study GS-01-934 (collected between August 2003 and September 2003) without any resistance mutations in protease or RT were randomly selected. Twenty-one samples from ARV-experienced patie…	The paper mentions that the samples were selected from patients enrolled in various Gilead studies, which doesn't mean these were clinical trials.	No
20308382	14	Does the paper report HIV sequences from individuals who had previously received ARV drugs?	We generated 31 recombinant viruses containing the entire *gag* and protease genes from 31 plasma samples from HIV-1-infected patients with ( *n* = 21) or without ( *n* = 10) prior ARV experience. Twenty-one samples from ARV-experienced patients were selected from two different past Gilead studies in order to capture a snapshot of patient susceptibility to bevirimat at two different time periods.	The paper mentions that 21 samples were from ARV-experienced patients, indicating that these individuals had previously received ARV drugs.	Yes
20308382	15	Which drug classes were received by individuals in the study before sample sequencing?	Twenty-one samples from ARV-experienced patients were selected from two different past Gilead studies in order to capture a snapshot of patient susceptibility to bevirimat at two different time periods. Eleven of these samples were from ARV-experienced patients enrolled in study GS-99-907 (collected between February 2000 and July 2000), and the remaining 10 samples were from ARV-experienced patie…	The paper mentions samples from ARV-experienced patients, but not reports the drug or drug classes.	Not reported
20308382	16	Which drugs were received by individuals in the study before sample sequencing?	Twenty-one samples from ARV-experienced patients were selected from two different past Gilead studies in order to capture a snapshot of patient susceptibility to bevirimat at two different time periods. Eleven of these samples were from ARV-experienced patients enrolled in study GS-99-907 (collected between February 2000 and July 2000), and the remaining 10 samples were from ARV-experienced patie…	The paper mentions samples from ARV-experienced patients, but not reports the drug or drug classes.	Not reported
20345882	1	Does the paper report HIV sequences from patient samples?	HIV-1 drug resistance mutations in children after failure of first-line nonnucleoside reverse transcriptase inhibitor-based antiretroviral therapy. One hundred and twenty children were included in the study. Their median age (interquartile range) was 9.1 (6.8–11.0) years, the median duration of their NNRTI regimens was 23.7 (15.7–32.6) months, their median CD4 percentage was 12% (4–20%), and thei…	The paper discusses genotypic resistance testing performed on HIV-infected children who experienced failure of NNRTI-based therapy. This indicates that HIV sequences from patient samples were analyzed to determine resistance mutations.	Yes
20345882	2	Does the paper report in vitro drug susceptibility data?	The aim of the study was to assess the prevalence, predictors and patterns of genotypic resistance mutations in children after failure of World Health Organization-recommended initial nonnucleoside reverse transcriptase inhibitor (NNRTI)-based treatment regimens. We carried out a multicentre retrospective study of genotyping tests performed for all HIV-infected children at eight paediatric centre…	The paper focuses on a retrospective study that analyzed genotypic resistance mutations in HIV-infected children who experienced failure of NNRTI-based treatment regimens. These is no mention of in vitro assays measuring the effectiveness of drugs against the virus.	No
20345882	3	Were sequences from the paper made publicly available?	No evidence	The paper does not provide any GenBank accession numbers for the sequenced HIV isolates.	No
20345882	4	What were the GenBank accession numbers for sequenced HIV isolates?	No evidence	The paper does not provide any GenBank accession numbers for the sequenced HIV isolates.	Not reported
20345882	5	How many individuals had samples obtained for HIV sequencing?	"Between September 2002 and June 2007, there were 151 children who met the inclusion criteria of experiencing failure of an NNRTI-based regimen and requiring a treatment switch to a second-line PI-based regimen. Genotype testing results were obtained for 120 children (79%)."	The paper states that genotype testing results were obtained for 120 children who met the inclusion criteria.	120
20345882	6	From which countries were the sequenced samples obtained?	"We carried out a multicentre retrospective study of genotyping tests performed for all HIV-infected children at eight paediatric centres in Thailand who experienced failure of NNRTI therapy at a time when virological monitoring was not routinely available. We collected treatment outcome data from eight large paediatric HIV centres in Thailand for all children who experienced failure of NNRTI-bas…	The study was conducted at eight paediatric centres in Thailand, and all the data and samples were collected from these centres.	Thailand
20345882	7	From what years were the sequenced samples obtained?	"Between September 2002 and June 2007, there were 151 children who met the inclusion criteria of experiencing failure of an NNRTI-based regimen and requiring a treatment switch to a second-line PI-based regimen."	The paper mentions that the study included children who met the inclusion criteria between September 2002 and June 2007.	2002-2007
20345882	8	Were samples cloned prior to sequencing?	Genotypic resistance testing was performed using the TruGene HIV-1 Genotyping system (Visible Genetics, Inc., Toronto, Canada) at five sites, the ViroSeq HIV-1 Genotyping System (Celera Diagnostics, Alameda, CA) at one site, and an in-house method using Stanford and IAS databases at two sites.	The paper does not mention any cloning of samples prior to sequencing.	No
20345882	9	Which HIV genes were reported to have been sequenced?	"The frequencies of selected mutations in the reverse transcriptase gene are shown in Tables 2 and 3. The most commonly detected mutation was M184V/I (85%) for lamivudine resistance. The prevalences of multi-NRTI-associated mutations were 22.5% for at least four TAMs, 11.7% for the Q151M complex and 1% for the 69 insertion."	The paper discusses mutations in the reverse transcriptase gene and provides detailed information on the specific mutations found in this gene, indicating that the reverse transcriptase gene was sequenced.	RT
20345882	10	What method was used for sequencing?	Genotypic resistance testing was performed using the TruGene HIV-1 Genotyping system (Visible Genetics, Inc., Toronto, Canada) at five sites, the ViroSeq HIV-1 Genotyping System (Celera Diagnostics, Alameda, CA) at one site, and an in-house method using Stanford and IAS databases at two sites.	The paper mentions the use of the TruGene HIV-1 Genotyping system and the ViroSeq HIV-1 Genotyping System, both of which are based on Sanger sequencing technology.	Sanger sequencing
20345882	11	What type of samples were sequenced?	Plasma HIV RNA measurement was performed only when treatment failure was suspected. Genotypic resistance testing was recommended for plasma HIV RNA >1000 copies/mL, which has been provided free of charge under the national programme since 2005. Genotype testing results were obtained for 120 children (79%). The other 31 children did not have genotype testing performed prior to switch and did not h…	The paper mentions that genotypic resistance testing was recommended for plasma HIV RNA >1000 copies/mL, indicating that plasma samples were used for sequencing.	Plasma
20345882	12	Were any sequences obtained from individuals with virological failure on a treatment regimen?	We carried out a multicentre retrospective study of genotyping tests performed for all HIV-infected children at eight paediatric centres in Thailand who experienced failure of NNRTI therapy at a time when virological monitoring was not routinely available. We collected treatment outcome data from eight large paediatric HIV centres in Thailand for all children who experienced failure of NNRTI-base…	The paper specifically focuses on children who experienced failure of NNRTI-based therapy, indicating that sequences were obtained from individuals with virological failure.	Yes
20345882	13	Were the patients in the study in a clinical trial?	We carried out a multicentre retrospective study of genotyping tests performed for all HIV-infected children at eight paediatric centres in Thailand who experienced failure of NNRTI therapy at a time when virological monitoring was not routinely available. We collected treatment outcome data from eight large paediatric HIV centres in Thailand for all children who experienced failure of NNRTI-base…	The paper was a retrospective study of data collected from eight large paediatric HIV centres, not a clinical trial.	No
20345882	14	Does the paper report HIV sequences from individuals who had previously received ARV drugs?	We carried out a multicentre retrospective study of genotyping tests performed for all HIV-infected children at eight paediatric centres in Thailand who experienced failure of NNRTI therapy at a time when virological monitoring was not routinely available. We collected treatment outcome data from eight large paediatric HIV centres in Thailand for all children who experienced failure of NNRTI-base…	The paper includes children who experienced failure of NNRTI-based therapy and received a ritonavir-boosted PI regimen as secondline treatment.	Yes
20345882	15	Which drug classes were received by individuals in the study before sample sequencing?	For this HIV drug resistance pattern study, the inclusion criteria were HIV infection, age <18 years, receipt of an NNRTI-based ART regimen containing either nevirapine or efavirenz, treatment failure on first-line therapy, and had genotypic resistance testing within 12 months prior to switching to a second-line regimen. Children who had a history of mono or dual NRTI therapy before starting NNRT…	The paper mentions that the children received NNRTI-based ART regimens containing either nevirapine or efavirenz, and the NRTI backbones included zidovudine plus lamivudine or stavudine plus lamivudine.	NRTI, NNRTI
20345882	16	Which drugs were received by individuals in the study before sample sequencing?	For this HIV drug resistance pattern study, the inclusion criteria were HIV infection, age <18 years, receipt of an NNRTI-based ART regimen containing either nevirapine or efavirenz, treatment failure on first-line therapy, and had genotypic resistance testing within 12 months prior to switching to a second-line regimen. Children who had a history of mono or dual NRTI therapy before starting NNRT…	The paper mentions that the children received NNRTI-based ART regimens containing either nevirapine or efavirenz, and the NRTI backbones included zidovudine plus lamivudine or stavudine plus lamivudine.	Nevirapine (NVP), Efavirenz (EFV), Zidovudine (AZT), Lamivudine (3TC), Stavudine (D4T)
20388636	1	Does the paper report HIV sequences from patient samples?	"The complete integrase gene was PCR-amplified from plasma samples collected at baseline and at the time of VF. The integrase sequences were determined at baseline (D0) before prescription of raltegravir."	The paper mentions that HIV-1 integrase gene sequences were obtained from plasma samples collected at baseline and at the time of virological failure (VF). This indicates that the study involved sequencing HIV from patient samples.	Yes
20388636	2	Does the paper report in vitro drug susceptibility data?	For phenotyping, the IN region was recombined with an IN-deleted HXB2-based HIV-1 backbone. A titrated amount of IN recombinant viruses was used for antiviral testing against raltegravir and elvitegravir. Drug susceptibility testing of recombinant viruses. Replication-competent recombinant viruses were titrated and subjected to antiviral testing in MT4-LTR-eGFP cells using raltegravir and elviteg…	The paper describes the process of antiviral testing against these drugs using recombinant viruses. It mentiones on phenotypic sensitivity to raltegravir and elvitegravir describes fold-change (FC) values, which are a measure of the drug concentration required to inhibit viral replication by 50% (IC50) compared to a reference strain.	Yes
20388636	3	Were sequences from the paper made publicly available?	No evidence	The paper does not provide any GenBank accession numbers for the sequenced HIV isolates. It focuses on the genotypic resistance testing and the results of those tests without mentioning specific accession numbers.	No
20388636	4	What were the GenBank accession numbers for sequenced HIV isolates?	No evidence	The paper does not provide any GenBank accession numbers for the sequenced HIV isolates. It focuses on the genotypic resistance testing and the results of those tests without mentioning specific accession numbers.	Not reported
20388636	5	How many individuals had samples obtained for HIV sequencing?	"Among 51 patients, 11 (21.6%) had VF. Four different patterns of IN mutations were observed: (i) emergence of Q148H/R with secondary mutations (n = 5 patients); (ii) emergence of N155H, then replaced by a pattern including Y143C/H/R (n = 3); (iii) selection of S230N (n = 1); and (iv) no evidence of selection of IN mutations (n = 2). The median raltegravir and elvitegravir fold changes (FCs) were…	The paper states that 11 patients with virological failure (VF) on raltegravir-containing regimens were included in the paper for sequencing, and the pattern of IN mutations were listed.	11
20388636	6	From which countries were the sequenced samples obtained?	The patients were selected from the ANRS Co3 Aquitaine Cohort, a prospective hospital-based cohort of HIV-1-infected patients in south-western France.The patients originated from a cohort of 51 antiretroviral-experienced patients treated by raltegravir-containing ART in the setting of an expanded access programme in France.	The paper mentions that the patients were selected from the ANRS Co3 Aquitaine Cohort, a hospital-based cohort of HIV-1-infected patients in south-western France.	France
20388636	7	From what years were the sequenced samples obtained?	No evidence	The paper does not provide specific years during which the sequenced samples were obtained. It mentions the follow-up periods but does not specify the years of sample collection.	Not reported
20388636	8	Were samples cloned prior to sequencing?	The complete integrase gene was PCR-amplified from plasma samples collected at baseline and at the time of VF. The sequence analysis was processed on a Beckmann CEQ 2000 XL Sequencer and the sequences were aligned with the HXB2 reference sequence.	The paper does not mention any cloning of samples prior to sequencing.	No
20388636	9	Which HIV genes were reported to have been sequenced?	"The complete integrase gene was PCR-amplified from plasma samples collected at baseline and at the time of VF. The integrase sequences were determined at baseline (D0) before prescription of raltegravir."	The paper focuses on the sequencing of the HIV-1 integrase gene, as indicated by multiple references to the amplification and sequencing of this specific gene.	IN
20388636	10	What method was used for sequencing?	After purification of the amplified DNA (S400 columns, Pharmacia), the integrase gene was sequenced by using two forward (IN1 and IN4542S) and two reverse (IN4764AS and BH4) primers. The sequence analysis was processed on a Beckmann CEQ 2000 XL Sequencer and the sequences were aligned with the HXB2 reference sequence.	The paper describes the sequencing procedures involving Beckmann CEQ 2000 XL Sequencer, which is a Sanger sequencing method.	Sanger sequencing
20388636	11	What type of samples were sequenced?	The complete integrase gene was PCR-amplified from plasma samples collected at baseline and at the time of VF. Plasma (1 mL) was centrifuged at 19 000 g for 1 h at 4°C, and viral RNA was extracted from the pellet using the High Pure Viral RNA Kit (Roche Diagnostics).	The paper specifies that plasma samples were used for the amplification and sequencing of the HIV-1 integrase gene.	Plasma
20388636	12	Were any sequences obtained from individuals with virological failure on a treatment regimen?	We set up a prospective study including antiretroviral-experienced patients receiving raltegravir-based regimens. Integrase (IN) genotypic resistance analysis was performed at baseline. IN was also sequenced at follow-up points in the case of VF. Among 51 patients, 11 (21.6%) had VF. Eleven patients who had virological failure (VF; defined as plasma HIV-1 RNA > 400 copies/mL after 3 months on ral…	The paper focuses on patients with virological failure (VF) on raltegravir-containing regimens and reports sequencing of HIV-1 integrase gene from these individuals.	Yes
20388636	13	Were the patients in the study in a clinical trial?	We set up a prospective study including antiretroviral-experienced patients receiving raltegravir-based regimens. The patients were selected from the ANRS Co3 Aquitaine Cohort, a prospective hospital-based cohort of HIV-1-infected patients in south-western France.	The paper describes the study as a prospective study involving patients from the ANRS Co3 Aquitaine Cohort, not a clinical trial.	No
20388636	14	Does the paper report HIV sequences from individuals who had previously received ARV drugs?	Our aim was to study the in vivo viral genetic pathways for resistance to raltegravir, in antiretroviral-experienced patients with virological failure (VF) on raltegravir-containing regimens. The patients originated from a cohort of 51 antiretroviral-experienced patients treated by raltegravir-containing ART in the setting of an expanded access programme in France.	The paper mentions including 51 antiretroviral-experienced patients, treated by raltegravir-containing ART.	Yes
20388636	15	Which drug classes were received by individuals in the study before sample sequencing?	The patients originated from a cohort of 51 antiretroviral-experienced patients treated by raltegravir-containing ART in the setting of an expanded access programme in France.13 The dosage of raltegravir was 400 mg twice daily. The co-prescribed antiretroviral drugs were chosen on the basis of a baseline genotypic resistance analysis. The patients were followed-up at months 0, 1, 3, 6, 9 and 12 o…	The paper indicates drugs that study including antiretroviral-experienced patients receiving raltegravir-based regimens, which is an INSTI drug.	INSTI
20388636	16	Which drugs were received by individuals in the study before sample sequencing?	The patients originated from a cohort of 51 antiretroviral-experienced patients treated by raltegravir-containing ART in the setting of an expanded access programme in France.13 The dosage of raltegravir was 400 mg twice daily. The co-prescribed antiretroviral drugs were chosen on the basis of a baseline genotypic resistance analysis. The patients were followed-up at months 0, 1, 3, 6, 9 and 12 o…	The paper indicates drugs that study including antiretroviral-experienced patients receiving raltegravir-based regimens.	Raltegravir (RAL)
20398371	1	Does the paper report HIV sequences from patient samples?	Initially, we selected 36 samples from 888 adult patients residing in São Paulo who had previously been diagnosed as being infected with subclade F1 based on *pol* subgenomic fragment sequencing; The six samples reported in this study were from individuals residing in São Paulo in the southeast region of Brazil and considered the most populous city in South America.	The paper mentions that the HIV sequences were obtained from patient samples. Specifically, it states that 36 samples were selected from 888 adult patients residing in São Paulo who had previously been diagnosed as being infected with subclade F1 based on *pol* subgenomic fragment sequencing.	Yes
20398371	2	Does the paper report in vitro drug susceptibility data?	Initially, we selected 36 samples from 888 adult patients residing in São Paulo who had previously been diagnosed as being infected with subclade F1 based on pol subgenomic fragment sequencing. Proviral DNA integrated in peripheral blood mononuclear cells (PBMC) was amplified from the purified genomic DNA of all 36-blood samples by five overlapping PCR fragments followed by direct sequencing. Seq…	The paper does not mention any in vitro drug susceptibility data. The focus is on the characterization of HIV-1 F1 intersubtype recombinants and their genomic sequences, not on drug susceptibility testing.	No
20398371	3	Were sequences from the paper made publicly available?	GenBank accession numbers for the proviral NFLG sequences reported in this study are (06BR_FPS561: HM026455, 07BR_FPS625: HM026456, 07BR_FPS742: HM026457, 07BR_FPS783: HM026458, 07BR_FPS810; HM026459, 07BR_FPS812: HM026460)	The genbank accesion numbers for each patient is directly shown and listed, HM026455;HM026456;HM026457;HM026458;HM026459;HM026460	Yes
20398371	4	What were the GenBank accession numbers for sequenced HIV isolates?	GenBank accession numbers for the proviral NFLG sequences reported in this study are (06BR_FPS561: HM026455, 07BR_FPS625: HM026456, 07BR_FPS742: HM026457, 07BR_FPS783: HM026458, 07BR_FPS810; HM026459, 07BR_FPS812: HM026460)	The genbank accesion numbers for each patient is directly shown and listed, HM026455;HM026456;HM026457;HM026458;HM026459;HM026460	HM026455;HM026456;HM026457;HM026458;HM026459;HM026460
20398371	5	How many individuals had samples obtained for HIV sequencing?	Initially, we selected 36 samples from 888 adult patients residing in São Paulo who had previously been diagnosed as being infected with subclade F1 based on *pol* subgenomic fragment sequencing.	The paper states that 36 samples were selected from 888 adult patients for sequencing, which indicatess 36 is the answer.	36
20398371	6	From which countries were the sequenced samples obtained?	The six samples reported in this study were from individuals residing in São Paulo in the southeast region of Brazil and considered the most populous city in South America. "	The paper states that the samples were from individuals residing in São Paulo, Brazil.	Brazil
20398371	7	From what years were the sequenced samples obtained?	No evidence	The paper does not provide specific years for when the samples were obtained.	Not reported
20398371	8	Were samples cloned prior to sequencing?	Both complementary DNA strands from each amplicon were directly sequenced by cycle sequencing using a variety of internal primers, BigDye terminator chemistry and *Taq* polymerase on an automated sequencer (ABI 3130, Applied Biosystems Inc., Foster City, CA), essentially according to the protocols recommended by the manufacturer.	The paper does not mention any cloning of samples prior to sequencing. It describes direct sequencing of PCR products.	No
20398371	9	Which HIV genes were reported to have been sequenced?	Here, we report the characterization of near full-length genome sequences (NFLG) of six phylogenetically related HIV-1 BF1 intersubtype recombinants; The NFLGs from five overlapping fragments were obtained by PCR using the Platinum *Taq* DNA polymerase (5 U/μl) (Invitrogen) and determined by a previously reported method.	The paper reports the sequencing of near full-length genome sequences (NFLG) of the HIV-1 isolates.	Near full length genome
20398371	10	What method was used for sequencing?	Both complementary DNA strands from each amplicon were directly sequenced by cycle sequencing using a variety of internal primers, BigDye terminator chemistry and *Taq* polymerase on an automated sequencer (ABI 3130, Applied Biosystems Inc., Foster City, CA), essentially according to the protocols recommended by the manufacturer.	The paper describes the use of cycle sequencing with BigDye terminator chemistry and ABI 3130 sequencer, which is the method of Sanger sequencing.	Sanger sequencing
20398371	11	What type of samples were sequenced?	Proviral DNA integrated in peripheral blood mononuclear cells (PBMC) was amplified from the purified genomic DNA of all 36-blood samples by five overlapping PCR fragments followed by direct sequencing.	Paper mentioned DNA integrated in peripheral blood mononuclear cells (PBMC) was amplified ", direclty mentions PBMC	PBMC
20398371	12	Were any sequences obtained from individuals with virological failure on a treatment regimen?	Characterization and frequency of a newly identified HIV-1 BF1 intersubtype circulating recombinant form in São Paulo, Brazil. Initially, we selected 36 samples from 888 adult patients residing in São Paulo who had previously been diagnosed as being infected with subclade F1 based on pol subgenomic fragment sequencing.	The paper mentioned the individuals were newly infected, which means they were treatment naïve, no virological failure.	No
20398371	13	Were the patients in the study in a clinical trial?	Initially, we selected 36 samples from 888 adult patients residing in São Paulo who had previously been diagnosed as being infected with subclade F1 based on pol subgenomic fragment sequencing.	The paper does not mention that the patients were part of a clinical trial. It describes the selection of samples based on previous diagnoses and sequencing results.	No
20398371	14	Does the paper report HIV sequences from individuals who had previously received ARV drugs?	Characterization and frequency of a newly identified HIV-1 BF1 intersubtype circulating recombinant form in São Paulo, Brazil. Initially, we selected 36 samples from 888 adult patients residing in São Paulo who had previously been diagnosed as being infected with subclade F1 based on pol subgenomic fragment sequencing.	The paper mentioned the individuals were newly infected, which means they were treatment naïve, hadn't previously received ARV drugs	No
20398371	15	Which drug classes were received by individuals in the study before sample sequencing?	Characterization and frequency of a newly identified HIV-1 BF1 intersubtype circulating recombinant form in São Paulo, Brazil. Initially, we selected 36 samples from 888 adult patients residing in São Paulo who had previously been diagnosed as being infected with subclade F1 based on pol subgenomic fragment sequencing.	The paper mentioned the individuals were newly infected, which means they were treatment naïve, hadn't previously received ARV drugs.	None
20398371	16	Which drugs were received by individuals in the study before sample sequencing?	Characterization and frequency of a newly identified HIV-1 BF1 intersubtype circulating recombinant form in São Paulo, Brazil. Initially, we selected 36 samples from 888 adult patients residing in São Paulo who had previously been diagnosed as being infected with subclade F1 based on pol subgenomic fragment sequencing.	The paper mentioned the individuals were newly infected, which means they were treatment naïve, hadn't previously received ARV drugs.	None
20421122	1	Does the paper report HIV sequences from patient samples?	To delineate the effect of resistance mutations on viral susceptibility to integrase inhibitors, in vitro resistance selections with raltegravir and with MK-2048, an integrase inhibitor with a second-generation-like resistance profile, were performed. The antiviral activity of inhibitors was determined in a cell-based HIV-1 replication assay in triplicate. Briefly, MT4-LTR-EGFP cells (400,000 cel…	The paper focuses on in vitro resistance selections and experiments using HIV-1 strains, specifically HIV-1 IIIB and HXB2D, which are laboratory strains. There is no mention of patient-derived sequences or samples.	No
20421122	2	Does the paper report in vitro drug susceptibility data?	To delineate the effect of resistance mutations on viral susceptibility to integrase inhibitors, in vitro resistance selections with raltegravir and with MK-2048, an integrase inhibitor with a second-generation-like resistance profile, were performed. Primary mutations selected in vitro with raltegravir confer large fold changes in susceptibility to first-generation integrase inhibitors, but mino…	The paper mentions to delineate the effect of resistations mutations on viral susceptibility to integrase inhibitors.	Yes
20421122	3	Were sequences from the paper made publicly available?	No evidence	The paper does not provide any GenBank accession numbers for sequenced HIV isolates. It focuses on in vitro experiments, which doesn't report new sequences, and does not mention depositing sequences in GenBank.	No
20421122	4	What were the GenBank accession numbers for sequenced HIV isolates?	No evidence	The paper does not provide any GenBank accession numbers for sequenced HIV isolates. It focuses on in vitro experiments, which doesn't report new sequences, and does not mention depositing sequences in GenBank.	Not reported
20421122	5	How many individuals had samples obtained for HIV sequencing?	Primary mutations selected in vitro with raltegravir confer large fold changes in susceptibility to first-generation integrase inhibitors, but minor fold changes to inhibitors with second-generation resistance profiles. To delineate the effect of resistance mutations on viral susceptibility to integrase inhibitors, in vitro resistance selections with raltegravir and with MK-2048, an integrase inh…	The paper mentioned in vitro reistance selection, and all sequences were generated using site-directed mutation technology, which means the sequence were not from clinical samples.	Not reported
20421122	6	From which countries were the sequenced samples obtained?	No evidence	The sequenced samples were obtained in vitro, meaning they were not derived from patient isolates from any specific country. The study focused on resistance selection and characterization of mutations arising in HIV-1 under selective pressure from integrase inhibitors, specifically raltegravir and MK-2048. This in vitro approach used laboratory-grown virus cultures and did not involve sequencing …	Not reported
20421122	7	From what years were the sequenced samples obtained?	No evidence	The paper does not provide any information about the years from which sequenced samples were obtained. It focuses on in vitro experiments and does not mention specific years for sample collection.	Not reported
20421122	8	Were samples cloned prior to sequencing?	Primary mutations selected in vitro with raltegravir confer large fold changes in susceptibility to first-generation integrase inhibitors, but minor fold changes to inhibitors with second-generation resistance profiles. To delineate the effect of resistance mutations on viral susceptibility to integrase inhibitors, in vitro resistance selections with raltegravir and with MK-2048, an integrase inh…	The paper mentioned in vitro reistance selection, and all sequences were generated using site-directed mutation technology, which means the sequence were not cloned from clinical samples.	No
20421122	9	Which HIV genes were reported to have been sequenced?	Site-directed mutants (SDMs) of IN coding sequences were constructed in the pUC19-5′HXB2D vector (XbaI–SalI fragment of pHXB2D), containing the HIV-1 clone HXB2D IN coding sequence, by using the QuikChange site-directed mutagenesis kit (Stratagene, La Jolla, CA) and high-performance liquid chromatography-purified primers (Genset Oligos, La Jolla, CA). Plasmid sequences were confirmed by dideoxyri…	The paper focuses on the integrase gene (IN) of HIV-1, and mentioned that SDM of IN were confiredm by sequencing.	IN
20421122	10	What method was used for sequencing?	Plasmid sequences were confirmed by dideoxyribose sequencing. PCR products were genotyped by automated population-based full-sequence analysis (ABI PRISM BigDye Terminator cycle sequencing; Applied Biosystems, Foster City, CA).	The paper mentions the use of dideoxyribose sequencing, and ABI PRISM BigDye Terminator cycle sequencing which means the study was using sanger sequencing.	Sanger sequencing
20421122	11	What type of samples were sequenced?	Primary mutations selected in vitro with raltegravir confer large fold changes in susceptibility to first-generation integrase inhibitors, but minor fold changes to inhibitors with second-generation resistance profiles. To delineate the effect of resistance mutations on viral susceptibility to integrase inhibitors, in vitro resistance selections with raltegravir and with MK-2048, an integrase inh…	The paper mentioned in vitro reistance selection, and all sequences were generated using site-directed mutation technology, which means the sequence were not from clinical samples.	Not reported
20421122	12	Were any sequences obtained from individuals with virological failure on a treatment regimen?	Primary mutations selected in vitro with raltegravir confer large fold changes in susceptibility to first-generation integrase inhibitors, but minor fold changes to inhibitors with second-generation resistance profiles. To delineate the effect of resistance mutations on viral susceptibility to integrase inhibitors, in vitro resistance selections with raltegravir and with MK-2048, an integrase inh…	The paper mentioned in vitro reistance selection, and all sequences were generated using site-directed mutation technology, which means the sequence were not from clinical samples.	No
20421122	13	Were the patients in the study in a clinical trial?	Primary mutations selected in vitro with raltegravir confer large fold changes in susceptibility to first-generation integrase inhibitors, but minor fold changes to inhibitors with second-generation resistance profiles. To delineate the effect of resistance mutations on viral susceptibility to integrase inhibitors, in vitro resistance selections with raltegravir and with MK-2048, an integrase inh…	The paper mentioned in vitro reistance selection, and all sequences were generated using site-directed mutation technology, which means the sequence were not from clinical samples.	No
20421122	14	Does the paper report HIV sequences from individuals who had previously received ARV drugs?	Primary mutations selected in vitro with raltegravir confer large fold changes in susceptibility to first-generation integrase inhibitors, but minor fold changes to inhibitors with second-generation resistance profiles. To delineate the effect of resistance mutations on viral susceptibility to integrase inhibitors, in vitro resistance selections with raltegravir and with MK-2048, an integrase inh…	The paper mentioned in vitro reistance selection, and all sequences were generated using site-directed mutation technology, which means the sequence were not from clinical samples.	Not reported
20421122	15	Which drug classes were received by individuals in the study before sample sequencing?	Primary mutations selected in vitro with raltegravir confer large fold changes in susceptibility to first-generation integrase inhibitors, but minor fold changes to inhibitors with second-generation resistance profiles. To delineate the effect of resistance mutations on viral susceptibility to integrase inhibitors, in vitro resistance selections with raltegravir and with MK-2048, an integrase inh…	The paper mentioned in vitro reistance selection, and all sequences were generated using site-directed mutation technology, which means the sequence were not from clinical samples.	Not reported
20421122	16	Which drugs were received by individuals in the study before sample sequencing?	Abstract Emergence of resistance to raltegravir reduces its treatment efficacy in HIV-1-infected patients. To delineate the effect of resistance mutations on viral susceptibility to integrase inhibitors, in vitro resistance selections with raltegravir and with MK-2048, an integrase inhibitor with a second-generation-like resistance profile, were performed. Mutation Q148R arose in four out of six …	The paper mentioned in vitro reistance selection, and all sequences were generated using site-directed mutation technology, which means the sequence were not from clinical samples.	Not reported
20426823	1	Does the paper report HIV sequences from patient samples?	DNA extracted from PBMC was PCR amplified from HIV(+) subjects; Partial *pol* amplicons (N = 164) and nearly full virus genomes (N = 78) were sequenced.	The paper mentions that DNA was extracted from PBMC of HIV(+) subjects and that partial *pol* amplicons and nearly full virus genomes were sequenced from these samples. This indicates that HIV sequences were obtained from patient samples.	Yes
20426823	2	Does the paper report in vitro drug susceptibility data?	To elucidate the virologic origins of the pandemic, a cross-sectional study was conducted of the genetic diversity of HIV-1 strains in villagers in 14 remote locations in Cameroon and in hospitalized and STI patients. DNA extracted from PBMC was PCR amplified from HIV(+) subjects. Partial pol amplicons (N = 164) and nearly full virus genomes (N = 78) were sequenced. Among the 3956 rural villagers…	The paper focuses on the genetic diversity of HIV-1 strains in Cameroon. There is no mention of in vitro drug susceptibility testing or data related to drug resistance profiles.	No
20426823	3	Were sequences from the paper made publicly available?	Nucleotide sequence accession numbers of the *pol* gene sequences from Cameroon are available under GenBank Accession No. AY847362-AY847453.	Paper mentioned sequences are "available under GenBank Accession No. AY847362-AY847453."	Yes
20426823	4	What were the GenBank accession numbers for sequenced HIV isolates?	Nucleotide sequence accession numbers of the *pol* gene sequences from Cameroon are available under GenBank Accession No. AY847362-AY847453.	Paper mentioned sequences are "available under GenBank Accession No. AY847362-AY847453."	AY847362-AY847453
20426823	5	How many individuals had samples obtained for HIV sequencing?	Partial *pol* amplicons (N = 164) and nearly full virus genomes (N = 78) were sequenced. There were 164 HIV-1 strains characterized by partial pol sequencing out of a possible 178. There were 78 full genomes completed in all, and of these 23 were URF.	The paper mentions that partial *pol* amplicons were sequenced from 164 HIV-1 strains, and there were 78 full genomes completed in all. The number of individuals were not mentioned.	Not reported
20426823	6	From which countries were the sequenced samples obtained?	HIV-1 recombinants with multiple parental strains in low-prevalence, remote regions of Cameroon: Evolutionary relics? To elucidate the virologic origins of the pandemic, a cross-sectional study was conducted of the genetic diversity of HIV-1 strains in villagers in 14 remote locations in Cameroon and in hospitalized and STI patients.	The study was conducted in various locations within Cameroon, as indicated by the description of the study sites and the collection of samples from rural villages, hospitals, and blood banks in Cameroon.	Cameroon
20426823	7	From what years were the sequenced samples obtained?	The paper does not mention the specific years of sample collection.	The paper does not provide specific information about the years during which the samples were collected.	Not reported
20426823	8	Were samples cloned prior to sequencing?	Virtually full-length genomes of HIV-1 were amplified from selected strains based on the results of partial pol sequencing. Limiting template dilution into the first round was performed to decrease the complexity of the sample and allow for direct sequencing of the second round PCR product.	The paper does not mention any cloning of samples prior to sequencing. It describes the direct sequencing of PCR amplification products.	No
20426823	9	Which HIV genes were reported to have been sequenced?	DNA extracted from PBMC was PCR amplified from HIV(+) subjects; Partial *pol* amplicons (N = 164) and nearly full virus genomes (N = 78) were sequenced; The DNA from PBMC was amplified by nested PCR in the *pol* gene producing a 1.1 kb fragment spanning protease and part of the reverse transcriptase (RT) gene.	The paper mentions the sequencing of partial *pol* amplicons, which include the protease and part of the reverse transcriptase (RT) gene, as well as nearly full virus genomes.	Near full length genome, PR, RT
20426823	10	What method was used for sequencing?	PCR amplification products of the *pol* gene and the nearly full-length strains were fully sequenced on both strands by using fluorescent dye terminators and an Applied BioSystems (Applied Biosystems Inc., Foster City, CA) Model 3100 DNA sequencer.	The paper describes the use of fluorescent dye terminators and an Applied BioSystems Model 3100 DNA sequencer, which are indicative of Sanger sequencing.	Sanger sequencing
20426823	11	What type of samples were sequenced?	HIV-positive blood was collected from the central blood bank in Yaounde, Cameroon, to monitor genotypes among blood donors. Blood was drawn and plasma and peripheral blood mononuclear cells (PBMC) were separated using CPT blood collection tubes. DNA extracted from PBMC was PCR amplified from HIV(+) subjects; Blood was drawn and plasma and peripheral blood mononuclear cells (PBMC) were separated u…	The paper specifies that DNA was extracted from peripheral blood mononuclear cells (PBMC) of HIV(+) subjects for sequencing.	PBMC
20426823	12	Were any sequences obtained from individuals with virological failure on a treatment regimen?	Of the 17 village sites in Cameroon that were selected for this study, 14 were used for the genetic analysis, shown in Figure ​Figure1.1. In a study approved by the IRB of Johns Hopkins University, participants were healthy adults who gave consent to participate, most of them subsistence farmers and hunters [21]. In addition, in-patients at two district hospitals (Ndikinimeki, Lomie) and outpatie…	The paper does not mention virological failure or treatment history, some samples were from blood donors which means they were treatment-naïve. The focus is on the genetic diversity of HIV-1 strains in various populations.	Not reported
20426823	13	Were the patients in the study in a clinical trial?	Of the 17 village sites in Cameroon that were selected for this study, 14 were used for the genetic analysis, shown in Figure ​Figure1.1. In a study approved by the IRB of Johns Hopkins University, participants were healthy adults who gave consent to participate, most of them subsistence farmers and hunters [21]. In addition, in-patients at two district hospitals (Ndikinimeki, Lomie) and outpatie…	The paper describes a cross-sectional study of genetic diversity in various populations, including villagers, hospitalized patients, and blood donors, the patients were not in a clinical trial.	No
20426823	14	Does the paper report HIV sequences from individuals who had previously received ARV drugs?	Of the 17 village sites in Cameroon that were selected for this study, 14 were used for the genetic analysis, shown in Figure ​Figure1.1. In a study approved by the IRB of Johns Hopkins University, participants were healthy adults who gave consent to participate, most of them subsistence farmers and hunters [21]. In addition, in-patients at two district hospitals (Ndikinimeki, Lomie) and outpatie…	The paper does not mention clear treatment history, some samples were from blood donors which means they were treatment-naïve. The focus is on the genetic diversity of HIV-1 strains in various populations.	Not reported
20426823	15	Which drug classes were received by individuals in the study before sample sequencing?	Of the 17 village sites in Cameroon that were selected for this study, 14 were used for the genetic analysis, shown in Figure ​Figure1.1. In a study approved by the IRB of Johns Hopkins University, participants were healthy adults who gave consent to participate, most of them subsistence farmers and hunters [21]. In addition, in-patients at two district hospitals (Ndikinimeki, Lomie) and outpatie…	The paper does not mention clear treatment history, some samples were from blood donors which means they were treatment-naïve. The focus is on the genetic diversity of HIV-1 strains in various populations.	Not reported
20426823	16	Which drugs were received by individuals in the study before sample sequencing?	Of the 17 village sites in Cameroon that were selected for this study, 14 were used for the genetic analysis, shown in Figure ​Figure1.1. In a study approved by the IRB of Johns Hopkins University, participants were healthy adults who gave consent to participate, most of them subsistence farmers and hunters [21]. In addition, in-patients at two district hospitals (Ndikinimeki, Lomie) and outpatie…	The paper does not mention clear treatment history, some samples were from blood donors which means they were treatment-naïve. The focus is on the genetic diversity of HIV-1 strains in various populations.	Not reported
20430786	1	Does the paper report HIV sequences from patient samples?	"Twenty-one HIV isolates were obtained from patients infected with HIV subtype G during an outbreak in Russia 20 years ago. Plasma samples from 21 patients were obtained in the years 2002--06 during therapy failure (defined as HIV detection under antiretroviral therapy) and analysed in the Pol region as well as in the complete Gag region."	The paper mentions that HIV isolates were obtained from patients infected with HIV subtype G during an outbreak in Russia. It specifically states that plasma samples from 21 patients were obtained and analyzed.	Yes
20430786	2	Does the paper report in vitro drug susceptibility data?	Twenty-one HIV isolates were obtained from patients infected with HIV subtype G during an outbreak in Russia 20 years ago. Most patients were failing antiretroviral therapy when genotyping was performed.	The paper doest not mention in vitro drug susceptibility data or phenotypic data. It mentions clinical isolates from patients failing antiretroviral therapy	No
20430786	3	Were sequences from the paper made publicly available?	"RT--PCR amplification and sequencing of the viral PR and RT from plasma were performed using the HIV ViroSeq genotyping system (Abbott) or an in-house RT--PCR. The complete gag gene was amplified using LTR-A-f (nt 687--706: CGACGCAGGACTCGGCTTGC) and C-gag1-r (nt 2382--2404: CCAATTCCCCCTATCATTTTTGG), and sequenced (GenBank ID GU991863--GU991883)."	The paper provides the GenBank ID for the sequenced HIV isolates in the methods section, specifically mentioning the range of accession numbers.	Yes
20430786	4	What were the GenBank accession numbers for sequenced HIV isolates?	"RT--PCR amplification and sequencing of the viral PR and RT from plasma were performed using the HIV ViroSeq genotyping system (Abbott) or an in-house RT--PCR. The complete gag gene was amplified using LTR-A-f (nt 687--706: CGACGCAGGACTCGGCTTGC) and C-gag1-r (nt 2382--2404: CCAATTCCCCCTATCATTTTTGG), and sequenced (GenBank ID GU991863--GU991883)."	The paper provides the GenBank ID for the sequenced HIV isolates in the methods section, specifically mentioning the range of accession numbers.	GU991863-GU991883
20430786	5	How many individuals had samples obtained for HIV sequencing?	"Plasma samples from 21 patients were obtained in the years 2002–06 during therapy failure (defined as HIV detection under antiretroviral therapy) and analysed in the Pol region as well as in the complete Gag region."	The paper mentioned "Plasma samples from 21 patients were obtained", which indicates 21.	21
20430786	6	From which countries were the sequenced samples obtained?	"Patients and methods All patients (n = 21) were infected with HIV-1 during an outbreak in Rostov on Don (Russian Federation) between the years 1988 and 1990."	The paper states that the patients were infected with HIV-1 during an outbreak in Rostov on Don, Russian Federation.	Russia
20430786	7	From what years were the sequenced samples obtained?	"Plasma samples from 21 patients were obtained in the years 2002--06 during therapy failure (defined as HIV detection under antiretroviral therapy) and analysed in the Pol region as well as in the complete Gag region."	The paper mentions that plasma samples from 21 patients were obtained in the years 2002-2006 during therapy failure.	2002-2006
20430786	8	Were samples cloned prior to sequencing?	RT–PCR amplification and sequencing of the viral PR and RT from plasma were performed using the HIV ViroSeq genotyping system (Abbott) or an in-house RT–PCR.	The paper does not mention any cloning of samples prior to sequencing.	No
20430786	9	Which HIV genes were reported to have been sequenced?	"Plasma samples from 21 patients were obtained in the years 2002--06 during therapy failure (defined as HIV detection under antiretroviral therapy) and analysed in the Pol region as well as in the complete Gag region. RT--PCR amplification and sequencing of the viral PR and RT from plasma were performed using the HIV ViroSeq genotyping system (Abbott) or an in-house RT--PCR. The complete gag gene…	The paper mentions that the Pol region (which includes PR and RT) and the complete Gag region were analyzed and sequenced.	Gag, PR, RT
20430786	10	What method was used for sequencing?	RT–PCR amplification and sequencing of the viral PR and RT from plasma were performed using the HIV ViroSeq genotyping system (Abbott) or an in-house RT–PCR.	The paper mentions that plasma were performed using the HIV ViroSeq genotyping system (Abbott), which is a Sanger sequencing method.	Sanger sequencing
20430786	11	What type of samples were sequenced?	RT–PCR amplification and sequencing of the viral PR and RT from plasma were performed using the HIV ViroSeq genotyping system (Abbott) or an in-house RT–PCR. Plasma samples from 21 patients were obtained in the years 2002–06 during therapy failure (defined as HIV detection under antiretroviral therapy) and analysed in the Pol region as well as in the complete Gag region.	The paper specifies that plasma samples from 21 patients were obtained and analyzed.	Plasma
20430786	12	Were any sequences obtained from individuals with virological failure on a treatment regimen?	Most patients were failing antiretroviral therapy when genotyping was performed. Plasma samples from 21 patients were obtained in the years 2002--06 during therapy failure (defined as HIV detection under antiretroviral therapy) and analysed in the Pol region as well as in the complete Gag region.	The paper mentions that most patients were failing antiretroviral therapy when genotyping was performed.	Yes
20430786	13	Were the patients in the study in a clinical trial?	All patients (n = 21) were infected with HIV-1 during an outbreak in Rostov on Don (Russian Federation) between the years 1988 and 1990. These patients acquired nosocomial HIV infection during childhood	The paper mentions the patients as having been infected during an outbreak, they were not in a clinical trial.	No
20430786	14	Does the paper report HIV sequences from individuals who had previously received ARV drugs?	Most patients were failing antiretroviral therapy when genotyping was performed. Plasma samples from 21 patients were obtained in the years 2002--06 during therapy failure (defined as HIV detection under antiretroviral therapy) and analysed in the Pol region as well as in the complete Gag region.	The paper mentions that most patients were failing antiretroviral therapy when genotyping was performed, indicating that they had previously received ARV drugs.	Yes
20430786	15	Which drug classes were received by individuals in the study before sample sequencing?	Moreover, mutations 440F, 441S, 441H, 441R, 442R and 449I found in a few Russian HIV isolates from patients failing either PI or RT inhibitor (RTI) therapies also did not change the frameshift efficiency of these isolates. In two patients, new PR and CS mutations developed during PI failure. Within the frameshift-regulating site p1, unique Gag non-CS mutations were found in one PI-resistant HIV i…	The paper mentions treatment failure on PI or RTI therapy.	NRTI, NNRTI, PI
20430786	16	Which drugs were received by individuals in the study before sample sequencing?	Moreover, mutations 440F, 441S, 441H, 441R, 442R and 449I found in a few Russian HIV isolates from patients failing either PI or RT inhibitor (RTI) therapies also did not change the frameshift efficiency of these isolates. In two patients, new PR and CS mutations developed during PI failure. Within the frameshift-regulating site p1, unique Gag non-CS mutations were found in one PI-resistant HIV i…	The paper mentions specific drugs such as efavirenz, indinavir, lopinavir.	Efavirenz (EFV), Indinavir (IDV), Lopinavir (LPV)
20438383	1	Does the paper report HIV sequences from patient samples?	Participants completed behavioral questionnaires and HIV testing. Western blot–confirmed specimens had peripheral mononuclear blood cells isolated for genotyping.	The paper mentions that peripheral mononuclear blood cells were isolated for genotyping from participants for genotyping	Yes
20438383	2	Does the paper report in vitro drug susceptibility data?	we describe HIV genotypes among injecting drug users (IDUs) and sex workers (SWs) in four Afghan cities. Participants completed behavioral questionnaires and HIV testing. Western blot–confirmed specimens had peripheral mononuclear blood cells isolated for genotyping. Analysis of recombinants was done by bootscanning and manual sequence alignment.	The paper focuses on the genotyping of HIV-1 strains. It does not mention any in vitro drug susceptibility testing or data.	No
20438383	3	Were sequences from the paper made publicly available?	"HIV-1 full genome sequences from this study have been submitted to GenBank, and the accession numbers are GQ477441-GQ477451."	The paper explicitly states that the HIV-1 full genome sequences from the study have been submitted to GenBank with the accession numbers GQ477441-GQ477451.	Yes
20438383	4	What were the GenBank accession numbers for sequenced HIV isolates?	"HIV-1 full genome sequences from this study have been submitted to GenBank, and the accession numbers are GQ477441-GQ477451."	The paper explicitly states that the HIV-1 full genome sequences from the study have been submitted to GenBank with the accession numbers GQ477441-GQ477451.	GQ477441-GQ477451
20438383	5	How many individuals had samples obtained for HIV sequencing?	Complete genetic sequences were obtained from the 11 participants, with Fig. 1 denoting genotypes by clade.	The paper states that complete genetic sequences were obtained from 11 participants.	11
20438383	6	From which countries were the sequenced samples obtained?	Distinct Circulating Recombinant HIV-1 Strains Among Injecting Drug Users and Sex Workers in Afghanistan. Of 623 IDUs recruited in three cities, 11 (1.77%) were HIV positive, all of whom were enrolled in Hirat. In total, 544 SWs were enrolled, of whom only one SW, recruited in Mazar-i-Sharif, was HIV positive (0.18%). The SW in Mazar was female, married, and had lived outside Afghanistan in Pakis…	The study focuses on high-risk groups in Afghanistan.	Afghanistan
20438383	7	From what years were the sequenced samples obtained?	"This cross-sectional study conducted between September 2006 and January 2008 surveyed SWs from Kabul, Jalalabad, and Mazar-i-Sharif, and IDUs in Jalalabad, Mazar-i-Sharif, and Hirat."	The paper states that the cross-sectional study was conducted between September 2006 and January 2008.	2006-2008
20438383	8	Were samples cloned prior to sequencing?	Genotyping of HIV-1 strains was conducted by using primary peripheral blood mononuclear cells (PBMCs) by the same methods described in the earlier Kabul analysis. Phylogenetic analysis was with PHYLIP, including SEQBOOT, DNADIST, NEIGHBOR, and CONSENSE modules, and trees were constructed with Treetool.	The paper does not mention any cloning of samples prior to sequencing nor sequencing method.	Not reported
20438383	9	Which HIV genes were reported to have been sequenced?	"Complete genetic sequences were obtained from the 11 participants, with Fig. 1 denoting genotypes by clade. HIV-1 full genome sequences from this study have been submitted to GenBank, and the accession numbers are GQ477441-GQ477451."	The paper mentions that complete genetic sequences were obtained from the participants and that HIV-1 full genome sequences were submitted to GenBank.	Full length genome
20438383	10	What method was used for sequencing?	Genotyping of HIV-1 strains was conducted by using primary peripheral blood mononuclear cells (PBMCs) by the same methods described in the earlier Kabul analysis. Phylogenetic analysis was with PHYLIP, including SEQBOOT, DNADIST, NEIGHBOR, and CONSENSE modules, and trees were constructed with Treetool.	The paper does not specify the exact sequencing method used. It mentions genotyping and phylogenetic analysis but does not detail the sequencing technology or platform.	Not reported
20438383	11	What type of samples were sequenced?	Genotyping of HIV-1 strains was conducted by using primary peripheral blood mononuclear cells (PBMCs) by the same methods described in the earlier Kabul analysis.	The paper states that genotyping of HIV-1 strains was conducted using primary peripheral blood mononuclear cells (PBMCs).	PBMC
20438383	12	Were any sequences obtained from individuals with virological failure on a treatment regimen?	Western blot–confirmed specimens had peripheral mononuclear blood cells isolated for genotyping. Repeatedly positive rapid HIV tests were confirmed with Western Blot. At each enrollment site, the study representatives obtained written informed consent, administered the questionnaire, provided pre-test counseling, performed whole-blood rapid testing, and completed posttest counseling	The paper mentioned rapid HIV test, which means individuals were not diagnosed for HIV-infection before, which means they were treatment naïve, and no virological failure.	No
20438383	13	Were the patients in the study in a clinical trial?	This cross-sectional study conducted between September 2006 and January 2008 surveyed SWs from Kabul, Jalalabad, and Mazar-i-Sharif, and IDUs in Jalalabad, Mazar-i-Sharif, and Hirat.	The paper describes a cross-sectional study conducted among high-risk groups in Afghanistan, not a clinical trial.	No
20438383	14	Does the paper report HIV sequences from individuals who had previously received ARV drugs?	we describe HIV genotypes among injecting drug users (IDUs) and sex workers (SWs) in four Afghan cities. Participants completed behavioral questionnaires and HIV testing. Western blot–confirmed specimens had peripheral mononuclear blood cells isolated for genotyping. Analysis of recombinants was done by bootscanning and manual sequence alignment.	The paper mentioned the participants completed the HIV testing, also mentioned Western blot-confirmed specimens, which means the infection condition was unknown before the test. So all of the individuals had not received ARV drugs.	No
20438383	15	Which drug classes were received by individuals in the study before sample sequencing?	Western blot–confirmed specimens had peripheral mononuclear blood cells isolated for genotyping. Repeatedly positive rapid HIV tests were confirmed with Western Blot. At each enrollment site, the study representatives obtained written informed consent, administered the questionnaire, provided pre-test counseling, performed whole-blood rapid testing, and completed posttest counseling	The paper mentioned rapid HIV test, which means individuals were not diagnosed for HIV-infection before, which means they were treatment naïve.	None
20438383	16	Which drugs were received by individuals in the study before sample sequencing?	Western blot–confirmed specimens had peripheral mononuclear blood cells isolated for genotyping. Repeatedly positive rapid HIV tests were confirmed with Western Blot. At each enrollment site, the study representatives obtained written informed consent, administered the questionnaire, provided pre-test counseling, performed whole-blood rapid testing, and completed posttest counseling	The paper mentioned rapid HIV test, which means individuals were not diagnosed for HIV-infection before, which means they were treatment naïve.	None
20453629	1	Does the paper report HIV sequences from patient samples?	"Genotypic resistance testing was performed on individuals with a viral load >400 RNA copies/ml. For HIV genotyping, viral RNA was isolated from plasma samples with viral load (VL) >400 copies/ml using the MagNa Pure LC Total Nucleic Acid Isolation kit on the MagNa Pure Automated System (Roche Diagnostics) and sequenced using an in-house assay at the National Institute for Communicable Diseases (…	The paper mentions that genotypic resistance testing was performed on individuals with a viral load >400 RNA copies/ml, and it describes the sequencing of viral RNA from plasma samples.	Yes
20453629	2	Does the paper report in vitro drug susceptibility data?	In 2008, we conducted a cross-sectional study among patients receiving ART for ≥12 months. Genotypic resistance testing was performed on individuals with a viral load >400 RNA copies/ml. Multiple logistic regression analysis was used to assess associations.	The paper focuses on genotypic resistance testing and does not mention any in vitro drug susceptibility assays or data.	No
20453629	3	Were sequences from the paper made publicly available?	No evidence	The paper does not provide any GenBank accession numbers for the sequenced HIV isolates.	No
20453629	4	What were the GenBank accession numbers for sequenced HIV isolates?	No evidence	The paper does not provide any GenBank accession numbers for the sequenced HIV isolates.	Not reported
20453629	5	How many individuals had samples obtained for HIV sequencing?	Of the 998 patients, 139 (14%) had a VL >400 copies/ml and were therefore defined as viremic on ART, with a median of 10,500 copies/ml (range 407 - 1,000,000). Genotypic resistance testing was performed on individuals with a viral load >400 RNA copies/ml.	The paper states that 139 patients had a viral load >400 copies/ml and were therefore defined as viremic on ART, with genotypic resistance testing performed on these individuals.	139
20453629	6	From which countries were the sequenced samples obtained?	nViremia and drug resistance among HIV-1 patients on antiretroviral treatment – a cross-sectional study in Soweto, South Africa. We assessed risk factors for viremia and drug resistance (DR) among long-term recipients of antiretroviral therapy (ART) in South Africa.	The study was conducted in Soweto, South Africa.	South Africa
20453629	7	From what years were the sequenced samples obtained?	"During March-September 2008, we recruited patients through posters in the clinic and pharmacy waiting areas in the three most widely spoken languages in Soweto: English, seSotho and isiZulu."	The study was conducted during March-September 2008, and the samples were obtained during this period.	2008
20453629	8	Were samples cloned prior to sequencing?	For HIV genotyping, viral RNA was isolated from plasma samples with viral load (VL) >400 copies/ml using the MagNa Pure LC Total Nucleic Acid Isolation kit on the MagNa Pure Automated System (Roche Diagnostics) and sequenced using an in-house assay at the National Institute for Communicable Diseases (NICD) in Johannesburg	The paper does not mention any cloning of samples prior to sequencing.	Not reported
20453629	9	Which HIV genes were reported to have been sequenced?	"For NRTIs, NNRTIs and PIs the prevalence of mutations was 64%, 81% and 2% among first-line and 29%, 54% and 6% among second-line failures respectively. M184V/I, K103N and V106A/M were the most common mutations."	The paper mentions the genotyping of samples, and the drug reistance of NRTI, NNRTI, and PI. That means the study was sequencing protease and reverse transcriptase genes.	PR, RT
20453629	10	What method was used for sequencing?	For HIV genotyping, viral RNA was isolated from plasma samples with viral load (VL) >400 copies/ml using the MagNa Pure LC Total Nucleic Acid Isolation kit on the MagNa Pure Automated System (Roche Diagnostics) and sequenced using an in-house assay at the National Institute for Communicable Diseases (NICD) in Johannesburg	The paper mentioned the samples were sequenced using in-house assay but the detail was not reported.	Not reported
20453629	11	What type of samples were sequenced?	For HIV genotyping, viral RNA was isolated from plasma samples with viral load (VL) >400 copies/ml	The paper specifies that viral RNA was isolated from plasma samples for genotyping.	Plasma
20453629	12	Were any sequences obtained from individuals with virological failure on a treatment regimen?	Genotypic resistance testing was performed on individuals with a viral load >400 RNA copies/ml. Of the 998 patients, 139 (14%) had a VL >400 copies/ml and were therefore defined as viremic on ART, with a median of 10,500 copies/ml (range 407 - 1,000,000).	The paper reports that genotypic resistance testing was performed on individuals with a viral load >400 RNA copies/ml, which is the defined viremic on ART, which means they were from individuals with virological failure.	Yes
20453629	13	Were the patients in the study in a clinical trial?	we recruited patients through posters in the clinic and pharmacy waiting areas in the three most widely spoken languages in Soweto: English, seSotho and isiZulu. nViremia and drug resistance among HIV-1 patients on antiretroviral treatment – a cross-sectional study in Soweto, South Africa. In 2008, we conducted a cross-sectional study among patients receiving ART for ≥12 months. We conducted a cr…	The paper describes a cross-sectional study conducted at outpatient clinics, not a clinical trial.	No
20453629	14	Does the paper report HIV sequences from individuals who had previously received ARV drugs?	In 2008, we conducted a cross-sectional study among patients receiving ART for ≥12 months. The following inclusion criteria were applied: 1) ≥18 years old; 2) being on ART ≥12 months; and 3) consenting to participate in the study.	The paper mentions that the paper involved patients who had been on ART for ≥12 months.	Yes
20453629	15	Which drug classes were received by individuals in the study before sample sequencing?	The prevalence of viremia was 14% (n=139); 12% (102/883) on first-line (i.e. NNRTI based regimen) and 33% (37/115) on second-line (i.e. PI based regimen) ART. Of viremic patients, 78% had DR mutations. For NRTIs, NNRTIs and PIs the prevalence of mutations was 64%, 81% and 2% among first-line and 29%, 54% and 6% among second-line failures respectively. The majority (89%) were on an NNRTI–based (fi…	The paper mentioned the individuals were on NNRTI, PI-based regimens, which also includes NRTI.	NRTI, PI, NNRTI
20453629	16	Which drugs were received by individuals in the study before sample sequencing?	Among the 14 first-line recipients who were on TB therapy, 13 were on stavudine, lamivudine and efavirenz and one was on zidovudine, lamivudine and efavirenz. All PI recipients were on lopinavir/ritonavir, except for one patient receiving ritonavir and atazanavir."	The paper lists specific drugs that were part of the treatment regimens for the patients, including Zidovudine (AZT), Lamivudine (3TC), Stavudine (D4T), Efavirenz (EFV), Lopinavir/ritonavir (LPV/r), Atazanavir (ATV/r).	Zidovudine (AZT), Lamivudine (3TC), Stavudine (D4T), Efavirenz (EFV), Lopinavir/ritonavir (LPV/r), Atazanavir (ATV/r)
20455758	1	Does the paper report HIV sequences from patient samples?	"Samples with >1,000 copies/ml HIV RNA were analyzed by using the ViroSeq HIV Genotyping System (ViroSeq). Samples were obtained from HIV-infected children who received HAART in the Makerere University--Johns Hopkins University (MU-JHU) Research Clinic, in Kampala, Uganda. HIV sequences obtained in this study were submitted to GenBank [Accession numbers: HM037809-HM037882 (baseline), HM037883-HM0…	The paper reports HIV sequences from children receiving antiretroviral therapy.	Yes
20455758	2	Does the paper report in vitro drug susceptibility data?	We analyzed drug resistance in HIV-infected Ugandan children who received antiretroviral therapy in a prospective, observational study (2004–2006); some children had prior single-dose nevirapine (sdNVP) exposure. Children received stavudine (d4T), lamivudine (3TC), and nevirapine (NVP); treatment was continued if they were clinically and immunologically stable. Samples with >1,000 copies/ml HIV R…	The paper does not mention any in vitro drug susceptibility data. The focus is on genotyping and resistance mutations detected in patient samples rather than in vitro susceptibility testing.	No
20455758	3	Were sequences from the paper made publicly available?	"HIV sequences obtained in this study were submitted to GenBank [Accession numbers: HM037809-HM037882 (baseline), HM037883-HM037894 (48 weeks), and HM037895-HM037902 (96 weeks)]."	The GenBank accession numbers for the sequenced HIV isolates are explicitly mentioned in the methods section of The paper.	Yes
20455758	4	What were the GenBank accession numbers for sequenced HIV isolates?	"HIV sequences obtained in this study were submitted to GenBank [Accession numbers: HM037809-HM037882 (baseline), HM037883-HM037894 (48 weeks), and HM037895-HM037902 (96 weeks)]."	The GenBank accession numbers for the sequenced HIV isolates are explicitly mentioned in the methods section of The paper.	HM037809-HM037902
20455758	5	How many individuals had samples obtained for HIV sequencing?	"Samples collected before HAART initiation (pretreatment samples) were available for 83 (90.2%) of the 92 children. HIV genotyping results were obtained by using the ViroSeq system for 74 (89.2%) of the 83 samples (HIV subtypes: 39 subtype A, 22 subtype D, one subtype C, and 12 inter-subtype recombinant)."	The paper states that "Samples collected before HAART initiation (pretreatment samples) were available for 83 (90.2%) of the 92 children"	83
20455758	6	From which countries were the sequenced samples obtained?	Analysis of Drug Resistance in Children Receiving Antiretroviral Therapy for Treatment of HIV-1 Infection in Uganda. We analyzed drug resistance in HIV-infected Ugandan children whoreceived antiretroviral therapy in a prospective. Samples were obtained from HIV-infected children who received HAART in the Makerere University--Johns Hopkins University (MU-JHU) Research Clinic, in Kampala, Uganda."	The paper clearly states that the samples were obtained from HIV-infected children in Uganda.	Uganda
20455758	7	From what years were the sequenced samples obtained?	"Ninety-two children were enrolled in the study from 2004 to 2006; 44 of the children had been exposed to sdNVP for prevention of MTCT."	The paper mentions that the study was conducted from 2004 to 2006, and this is when the samples were obtained.	2004-2006
20455758	8	Were samples cloned prior to sequencing?	Samples with >1,000 copies/ml HIV RNA were analyzed by using the ViroSeq HIV Genotyping System (ViroSeq). The ViroSeq HIV Genotyping System v2.7 (Celera Diagnostics, Alameda, CA) was used for HIV genotyping, by using 0.25 ml plasma samples with at least 1,000 copies/ml HIV RNA.	The paper does not mention any cloning of samples prior to sequencing.	No
20455758	9	Which HIV genes were reported to have been sequenced?	Bidirectional sequence data were obtained for HIV reverse transcriptase (amino acids 41--335) for 88 (93.6%) of 94 samples with resistance test results (74 pretreatment samples and 20 follow-up samples). Pretreatment samples were analyzed with the ViroSeq HIV Genotyping System for detection of mutations in HIV protease and reverse transcriptase."	The paper reports sequencing of the reverse transcriptase and protease genes of HIV.	PR, RT
20455758	10	What method was used for sequencing?	Samples with >1,000 copies/ml HIV RNA were analyzed by using the ViroSeq HIV Genotyping System (ViroSeq). The ViroSeq HIV Genotyping System v2.7 (Celera Diagnostics, Alameda, CA) was used for HIV genotyping, by using 0.25 ml plasma samples with at least 1,000 copies/ml HIV RNA.	The paper describes the use of the ViroSeq HIV Genotyping System, which is based on Sanger sequencing technology.	Sanger sequencing
20455758	11	What type of samples were sequenced?	The ViroSeq HIV Genotyping System v2.7 (Celera Diagnostics, Alameda, CA) was used for HIV genotyping, by using 0.25 ml plasma samples with at least 1,000 copies/ml HIV RNA. Plasma samples were stored for HIV-resistance testing.	The paper specifies that plasma samples were used for HIV resistance testing and sequencing.	Plasma
20455758	12	Were any sequences obtained from individuals with virological failure on a treatment regimen?	Among children who were not virally suppressed at 48 weeks of treatment, all 12 tested had NNRTI resistance, as well as resistance to 3TC and emtricitibine (FTC); three had resistance to other NRTIs.	The paper reports sequences from individuals who were not virally suppressed at 48 weeks of treatment, indicating virological failure.	Yes
20455758	13	Were the patients in the study in a clinical trial?	We analyzed drug resistance in HIV-infected Ugandan children who received antiretroviral therapy in a prospective, observational study (2004–2006);	The paper describes the study as a prospective, observational study, which is not a type of clinical trial.	No
20455758	14	Does the paper report HIV sequences from individuals who had previously received ARV drugs?	We analyzed drug resistance in HIV-infected Ugandan children who received antiretroviral therapy in a prospective, observational study (2004--2006); some children had prior single-dose nevirapine (sdNVP) exposure.	The paper reports children who received antiretroviral (ARV) theoray and some had prior single-dose nevirapine (sdNVP) exposure, which is and ARV drug.	Yes
20455758	15	Which drug classes were received by individuals in the study before sample sequencing?	Children received stavudine (d4T), lamivudine (3TC), and nevirapine (NVP); treatment was continued if they were clinically and immunologically stable. The children received a combination of stavudine (d4T), lamivudine (3TC), and nevirapine (NVP).	The paper mentions that the children received a combination of stavudine (d4T), lamivudine (3TC) which were NRTI, and nevirapine (NVP) which is NNRTI.	NRTI, NNRTI
20455758	16	Which drugs were received by individuals in the study before sample sequencing?	Children received stavudine (d4T), lamivudine (3TC), and nevirapine (NVP); treatment was continued if they were clinically and immunologically stable. The children received a combination of stavudine (d4T), lamivudine (3TC), and nevirapine (NVP).	The paper specifies that the children received stavudine (d4T), lamivudine (3TC), and nevirapine (NVP) as part of their antiretroviral therapy.	Stavudine (D4T), Lamivudine (3TC), Nevirapine (NVP)
20483657	1	Does the paper report HIV sequences from patient samples?	HIV-1 RNA was extracted from plasma of 59 HIV-1 infected, drug-naïve subjects with CD4 ^+^ T-cell counts \< 200/μl; Viral RNA was isolated from 59 HIV-positive patients, and in most strains (44; 75%) both PR and RT were sequenced, while PR was the only region sequenced in 5 strains (8%) and RT in other 5.	The paper mentions that HIV-1 RNA was extracted from plasma of 59 HIV-1 infected, drug-naïve subjects. This indicates that the study involved sequencing HIV from patient samples.	Yes
20483657	2	Does the paper report in vitro drug susceptibility data?	To determine HIV diversity in Yaoundé, Cameroon, in a cohort of HIV-infected subjects with advanced disease. To characterize HIV-1 mutations conferring primary drug resistance and to assess primary resistance patterns in the RNase H domain of the reverse transcriptase of these viruses. HIV-1 RNA was extracted from plasma of 59 HIV-1 infected, drug-naïve subjects with CD4+ T-cell counts < 200/μl. …	The paper focuses on sequencing and identifying drug resistance mutations in patient samples but does not mention conducting in vitro drug susceptibility tests.	No
20483657	3	Were sequences from the paper made publicly available?	Sequences obtained in the study were submitted to the GenBank under accession numbers GU366105-GU366190.	Paper mentioned sequences are "submitted to the GenBank under accession numbers GU366105-GU366190."	Yes
20483657	4	What were the GenBank accession numbers for sequenced HIV isolates?	Sequences obtained in the study were submitted to the GenBank under accession numbers GU366105-GU366190.	Paper mentioned sequences are "submitted to the GenBank under accession numbers GU366105-GU366190."	GU366105-GU366190
20483657	5	How many individuals had samples obtained for HIV sequencing?	Patients and samples. Fifty-nine patients with confirmed HIV infection and late-stage AIDS were recruited at the HIV/AIDS and Dermatology Clinic of the University of Yaoundé Teaching Hospital between 2002 and 2005. All patients were HIV-positive, ARV-naïve, had CD4 counts below 200 and signed an informed consent to participate in the study. Five milliliters of whole blood were collected from each…	The paper states that 59 patients with confirmed HIV infection and late-stage AIDS were recruited for the study, and their samples were used for sequencing.	59
20483657	6	From which countries were the sequenced samples obtained?	Molecular diversity and polymerase gene genotypes of HIV-1 among treatment-naïve Cameroonian subjects with advanced disease. The progress of antiretroviral treatment roll-out programs in developing countries requires extensive monitoring of primary drug resistance prior to initiation of therapy. This is particularly relevant for Cameroon where a high HIV diversity has been reported. To determine …	The study was conducted in Yaoundé, Cameroon.	Cameroon
20483657	7	From what years were the sequenced samples obtained?	Fifty-nine patients with confirmed HIV infection and late-stage AIDS were recruited at the HIV/AIDS and Dermatology Clinic of the University of Yaound√© Teaching Hospital between 2002 and 2005.	Paper mentioned patients were recruited "between 2002 and 2005".	2002-2005
20483657	8	Were samples cloned prior to sequencing?	RT-PCR and DNA sequencing. Extraction of HIV-1 RNA was done as previously described.14, 15 Complementary DNA synthesis and PCR amplification of the HIV-1 pol region spanning the entire protease (PR) gene and approximately two-thirds of the reverse transcriptase (RT) gene (a 1152 bp fragment) were conducted in two steps with specific nested primers.15 Where this was not successful, PR and RT were …	The paper does not mention any cloning of samples prior to sequencing.	No
20483657	9	Which HIV genes were reported to have been sequenced?	HIV-1 pol (PR, RT and RNase H) regions were sequenced for subtyping and for identifying drug resistance mutations in *pol* (PR, RT and RNase H). Complementary DNA synthesis and PCR amplification of the HIV-1 *pol* region spanning the entire protease (PR) gene and approximately two-thirds of the reverse transcriptase (RT) gene (a 1152 bp fragment) were conducted in two steps with specific nested p…	The paper mentions sequencing the HIV-1 pol region, which includes the protease (PR) gene, the reverse transcriptase (RT) gene, and the RNase H domain.	PR, RT
20483657	10	What method was used for sequencing?	All PCR products were purified, and sequenced using the Big Dye v.3.1 kit (Applied Biosystems, Foster City, USA) with an automated ABI Prism ABI377 Genetic Analyzer (Applied Biosystems) according to the manufacturer's specifications and using inner PCR primers. Electropherograms were assembled with SeqMan (DNAStar, Madison, USA) and manually edited.	The paper mentions the use of the Big Dye v.3.1 kit and an automated ABI Prism ABI377 Genetic Analyzer and Electropherograms, which are associated with Sanger sequencing.	Sanger sequencing
20483657	11	What type of samples were sequenced?	HIV-1 RNA was extracted from plasma of 59 HIV-1 infected, drug-naïve subjects with CD4+ T-cell counts < 200/μl.	The paper states that HIV-1 RNA was extracted from plasma of the subjects.	Plasma
20483657	12	Were any sequences obtained from individuals with virological failure on a treatment regimen?	HIV-1 RNA was extracted from plasma of 59 HIV-1 infected, drug-naïve subjects with CD4+ T-cell counts < 200/μl.	The paper specifically mentions that the subjects were drug-naïve, meaning they had not received antiretroviral treatment before the samples were obtained.	No
20483657	13	Were the patients in the study in a clinical trial?	Fifty-nine patients with confirmed HIV infection and late-stage AIDS were recruited at the HIV/AIDS and Dermatology Clinic of the University of Yaoundé Teaching Hospital between 2002 and 2005.	The paper does not mention that the patients were part of a clinical trial. It describes the recruitment of patients for a study on HIV diversity and drug resistance.	No
20483657	14	Does the paper report HIV sequences from individuals who had previously received ARV drugs?	HIV-1 RNA was extracted from plasma of 59 HIV-1 infected, drug-naïve subjects with CD4 ^+^ T-cell counts \< 200/μl.	The paper specifically mentions that the subjects were drug-naïve, meaning they had not received antiretroviral treatment before the samples were obtained.	No
20483657	15	Which drug classes were received by individuals in the study before sample sequencing?	HIV-1 RNA was extracted from plasma of 59 HIV-1 infected, drug-naïve subjects with CD4 ^+^ T-cell counts \< 200/μl.	The paper specifically mentions that the subjects were drug-naïve, meaning they had not received any antiretroviral drugs before the samples were obtained.	None
20483657	16	Which drugs were received by individuals in the study before sample sequencing?	HIV-1 RNA was extracted from plasma of 59 HIV-1 infected, drug-naïve subjects with CD4 ^+^ T-cell counts \< 200/μl.	The paper specifically mentions that the subjects were drug-naïve, meaning they had not received any antiretroviral drugs before the samples were obtained.	None
20507208	1	Does the paper report HIV sequences from patient samples?	A total of 147 *pol* sequences were obtained from patients with first virologic failure who received nevirapine- and efavirenz-based regimens.	The paper mentions that a total of 147 *pol* sequences were obtained from patients with first virologic failure who received nevirapine- and efavirenz-based regimens. This indicates that the study involved sequencing HIV from patient samples.	Yes
20507208	2	Does the paper report in vitro drug susceptibility data?	" Patients Infected with HIV Type 1 Subtype CRF01_AE and Failing First-Line Nevirapine- and Efavirenz-Based Regimens Demonstrate Considerable Cross-Resistance to Etravirine"	The paper focuses on genotypic resistance and the presence of resistance-associated mutations (RAMs) in patient samples. It does not mention conducting in vitro drug susceptibility assays.	No
20507208	3	Were sequences from the paper made publicly available?	All sequences are available at http://id.ucsd.edu/Faculty/DaveySmithMD/DATA/tabid/338/Default.aspx.	The paper does not provide any GenBank accession numbers for the sequenced HIV isolates. It mentions that all sequences are available at a specific URL, but no accession numbers are listed.	No
20507208	4	What were the GenBank accession numbers for sequenced HIV isolates?	All sequences are available at http://id.ucsd.edu/Faculty/DaveySmithMD/DATA/tabid/338/Default.aspx.	The paper does not provide any GenBank accession numbers for the sequenced HIV isolates. It mentions that all sequences are available at a specific URL, but no accession numbers are listed.	Not reported
20507208	5	How many individuals had samples obtained for HIV sequencing?	A total of 147 *pol* sequences were obtained from patients with first virologic failure who received nevirapine- and efavirenz-based regimens.	The paper mentions that a total of 147 *pol* sequences were obtained from patients.	147
20507208	6	From which countries were the sequenced samples obtained?	All patients followed at Bamrasnaradura Infectious Diseases Institute, Ministry of Public Health, Thailand, between January 2005 and June 2008 were evaluated for antiretroviral therapy failure. To investigate these issues, we examined the associated factors and frequency of etravirine cross-resistance in a clinical practice in which viral loads are available and among patients infected with CRF_0…	The paper states that all patients were from Thailand.	Thailand
20507208	7	From what years were the sequenced samples obtained?	All patients followed at Bamrasnaradura Infectious Diseases Institute, Ministry of Public Health, Thailand, between January 2005 and June 2008 were evaluated for antiretroviral therapy failure.	The paper specifies that patients were evaluated between January 2005 and June 2008.	2005-2008
20507208	8	Were samples cloned prior to sequencing?	No evidence	The paper does not mention any process of cloning samples prior to sequencing.	Not reported
20507208	9	Which HIV genes were reported to have been sequenced?	For cohort patients identified with failing first-line antiretroviral therapy regimens, the HIV-1 RNA *pol* gene was genotyped (TRUGENE HIV-1).	The paper mentions that the HIV-1 RNA *pol* gene was genotyped.	Pol
20507208	10	What method was used for sequencing?	For cohort patients identified with failing first-line antiretroviral therapy regimens, the HIV-1 RNA *pol* gene was genotyped (TRUGENE HIV-1).	The paper mentions that the HIV-1 RNA *pol* gene was genotyped using TRUGENE HIV-1, which is a method based on Sanger sequencing.	Sanger sequencing
20507208	11	What type of samples were sequenced?	For cohort patients identified with failing first-line antiretroviral therapy regimens, the HIV-1 RNA pol gene was genotyped (TRUGENE HIV-1).	The paper mentions the HIV-1 RNA pol gene was genotypes, indicating the samples were from plasma.	Plasma
20507208	12	Were any sequences obtained from individuals with virological failure on a treatment regimen?	Patients Infected with HIV Type 1 Subtype CRF01_AE and Failing First-Line Nevirapine- and Efavirenz-Based Regimens Demonstrate Considerable Cross-Resistance to Etravirine. All patients followed at Bamrasnaradura Infectious Diseases Institute, Ministry of Public Health, Thailand, between January 2005 and June 2008 were evaluated for antiretroviral therapy failure based on guidelines for antiretrov…	The paper states that sequences were obtained from patients with first virologic failure who received nevirapine- and efavirenz-based regimens, or "identified with failing first-line antiretroviral therapy regimens".	Yes
20507208	13	Were the patients in the study in a clinical trial?	All patients followed at Bamrasnaradura Infectious Diseases Institute, Ministry of Public Health, Thailand, between January 2005 and June 2008 were evaluated for antiretroviral therapy failure.	The paper does not mention that the patients were part of a clinical trial.	No
20507208	14	Does the paper report HIV sequences from individuals who had previously received ARV drugs?	A total of 147 *pol* sequences were obtained from patients with first virologic failure who received nevirapine- and efavirenz-based regimens.	The paper mentions that the sequences were obtained from patients who received nevirapine- and efavirenz-based regimens, which are antiretroviral drugs.	Yes
20507208	15	Which drug classes were received by individuals in the study before sample sequencing?	A total of 147 pol sequences were obtained from patients with first virologic failure who received nevirapine- and efavirenz-based regimens. In all, 110 (82%) patients were receiving nevirapine-based regimens and 24 (18%) were receiving efavirenz. Backbone nucleoside reverse transcriptase (NRTI) regimens included 76% stavudine + lamivudine, 15% zidovudine + lamivudine, 6% tenofovir + lamivudine, …	Paper mentioned they obtained sequences from patients receiving nevirapine- and efavirenz-based regimens, both are NNRTIs. and the backbone regimens are all NRTIs. Hence the two drug classes are shown.	NRTI, NNRTI
20507208	16	Which drugs were received by individuals in the study before sample sequencing?	A total of 147 pol sequences were obtained from patients with first virologic failure who received nevirapine- and efavirenz-based regimens. In all, 110 (82%) patients were receiving nevirapine-based regimens and 24 (18%) were receiving efavirenz. Backbone nucleoside reverse transcriptase (NRTI) regimens included 76% stavudine + lamivudine, 15% zidovudine + lamivudine, 6% tenofovir + lamivudine, …	The paper lists the specific drugs that were part of the patients' regimens, including nevirapine, efavirenz, stavudine, lamivudine, zidovudine, tenofovir, and didanosine.	Nevirapine, Efavirenz, Stavudine, Lamivudine, Zidovudine, Tenofovir, Didanosine
20530226	1	Does the paper report HIV sequences from patient samples?	The patients included in this study were screened for the Maraviroc Expanded Access Program (MVC EAP) in France between January, 2007 and August 2008 and received MVC associated with an optimized background therapy if the result of the phenotypic assay for coreceptor use determination was CCR5, using a previously validated assay (Trofile; Monogram Biosciences) (18). For the last group of patients…	The paper mentions that all patients were included in genotype-phenotype comparison, which indicates the study report HIV sequences from patient samples.	Yes
20530226	2	Does the paper report in vitro drug susceptibility data?	Both genotypic and phenotypic results were obtained for 189 patients at screening, with 54 isolates scored as X4 or D/M and 135 scored as R5 with Trofile. Evaluation of the Genotypic Prediction of HIV-1 Coreceptor Use versus a Phenotypic Assay and Correlation with the Virological Response to Maraviroc: the ANRS GenoTropism Study. All screened patients were included in the genotype-phenotype compa…	The paper mentions that all patients were included in genotype-phenotype comparison, which indicates the study includes in vitro drug susceptibility data.	Yes
20530226	3	Were sequences from the paper made publicly available?	"The reverse transcriptase, protease, and gp120 sequences from the patients in this study were given GenBank accession no. HM035546 to HM035976."	The paper explicitly states the range of GenBank accession numbers for the sequenced HIV isolates.	Yes
20530226	4	What were the GenBank accession numbers for sequenced HIV isolates?	"The reverse transcriptase, protease, and gp120 sequences from the patients in this study were given GenBank accession no. HM035546 to HM035976."	The paper explicitly states the range of GenBank accession numbers for the sequenced HIV isolates.	HM035546 to HM035976
20530226	5	How many individuals had samples obtained for HIV sequencing?	"Thus, 189 patients had both Trofile and gp120 sequence determination and were included in the study comparing genotypic and phenotypic determinations of coreceptor use."	The paper states that 189 patients had both Trofile and gp120 sequence determination and were included in the study comparing genotypic and phenotypic determinations of coreceptor use.	189
20530226	6	From which countries were the sequenced samples obtained?	The patients included in this study were screened for the Maraviroc Expanded Access Program (MVC EAP) in France between January, 2007 and August 2008. The patients were included in the GenoTropism Study in 18 participating centers in France."	The paper specifies that the patients were screened for the Maraviroc Expanded Access Program (MVC EAP) in France and were included in the GenoTropism Study in 18 participating centers in France.	France
20530226	7	From what years were the sequenced samples obtained?	"The patients included in this study were screened for the Maraviroc Expanded Access Program (MVC EAP) in France between January, 2007 and August 2008."	The paper mentions that the patients were screened for the Maraviroc Expanded Access Program (MVC EAP) in France between January 2007 and August 2008.	2007-2008
20530226	8	Were samples cloned prior to sequencing?	No evidence	The paper does not mention any cloning of samples prior to sequencing.	Not reported
20530226	9	Which HIV genes were reported to have been sequenced?	"Sequences of the protease and reverse transcriptase (RT) genes were determined at baseline MVC in each laboratory using the ANRS consensus technique. The gp120 sequence analysis comprising the complete V3 loop sequence was performed from plasma sampled at the date of screening of the MVC EAP."	The paper mentions sequencing of the protease and reverse transcriptase (RT) genes, as well as the gp120 sequence, which is part of the envelope gene.	PR, RT, Env
20530226	10	What method was used for sequencing?	"Sequences of the protease and reverse transcriptase (RT) genes were determined at baseline MVC in each laboratory using the ANRS consensus technique, ( http://www.hivfrenchresistance.org ), the Siemens TruGene kit, and the Abbott ViroSeq kit or an in-house method."	The paper mentions the use of the Siemens TruGene kit and the Abbott ViroSeq kit, both of which are based on Sanger sequencing technology.	Sanger sequencing
20530226	11	What type of samples were sequenced?	The gp120 sequence analysis comprising the complete V3 loop sequence was performed from plasma sampled at the date of screening of the MVC EAP.	The paper specifies that plasma samples were used for sequencing the V3 loop and other genes.	Plasma
20530226	12	Were any sequences obtained from individuals with virological failure on a treatment regimen?	Inclusion criteria for the MVC EAP were HIV-1 infection, ≥18 years of age, previous antiretroviral therapy, and virological failure with a plasma HIV-1 RNA load of >1,000 copies/ml.	The inclusion criteria for the study required patients to have virological failure with a plasma HIV-1 RNA load of >1,000 copies/ml.	Yes
20530226	13	Were the patients in the study in a clinical trial?	Study population. The patients included in this study were screened for the Maraviroc Expanded Access Program (MVC EAP) in France between January, 2007 and August 2008 and received MVC associated with an optimized background therapy if the result of the phenotypic assay for coreceptor use determination was CCR5, using a previously validated assay (Trofile; Monogram Biosciences) (18). For the last…	The patients were part of the Maraviroc Expanded Access Program (MVC EAP) and the GenoTropism Study, which involved clinical follow-up and data collection, but the study didn't mention this is a clinical trial	No
20530226	14	Does the paper report HIV sequences from individuals who had previously received ARV drugs?	Inclusion criteria for the MVC EAP were HIV-1 infection, ≥18 years of age, previous antiretroviral therapy, and virological failure with a plasma HIV-1 RNA load of >1,000 copies/ml.	The inclusion criteria required patients to have previous antiretroviral therapy and virological failure	Yes
20530226	15	Which drug classes were received by individuals in the study before sample sequencing?	Within these 189 patients, 54 had a Trofile result of X4 or dual or mixed (D/M) and 135 were scored as R5 with Trofile and were treated with MVC.	The paper mentions the use of maraviroc (MVC) which is a fusion inhibitor.	CCR5 antagonist
20530226	16	Which drugs were received by individuals in the study before sample sequencing?	Within these 189 patients, 54 had a Trofile result of X4 or dual or mixed (D/M) and 135 were scored as R5 with Trofile and were treated with MVC.	The paper mentions the use of maraviroc (MVC) which is a fusion inhibitor.	maraviroc
20621204	1	Does the paper report HIV sequences from patient samples?	"Sixty-one HIV-1 BF1 recombinant strains were identified after screening of a total of 1504 pr/rt sequences recovered from 1994 to 2005 in HIV-1 seropositive individuals from Rio de Janeiro State."	The paper mentions that 61 HIV-1 BF1 recombinant strains were identified from a total of 1504 pr/rt sequences recovered from HIV-1 seropositive individuals in Rio de Janeiro State. This indicates that the sequences were obtained from patient samples.	Yes
20621204	2	Does the paper report in vitro drug susceptibility data?	The aim of this study was to investigate mosaic structure and phylogenetic relationship among several BF1 (protease–reverse transcriptase, pr/rt) recombinant sequences obtained from a group of patients from Rio de Janeiro, Brazil, from 1994 to 2005. Phylogenetic relationships were estimated by Bayesian and SplitsTree methods. Recombination breakpoints were analyzed by Bootscan.	The paper focuses on the genetic analysis and phylogenetic relationships of HIV-1 BF1 recombinant strains. It does not mention any in vitro drug susceptibility testing or data.	No
20621204	3	Were sequences from the paper made publicly available?	"GenBank accession numbers: HM439694--HM439716 (env-2), HM439716--HM439738 (env-1), HM439739--HM439762 (int)."	The paper provides the GenBank accession numbers for the sequenced HIV isolates	Yes
20621204	4	What were the GenBank accession numbers for sequenced HIV isolates?	"GenBank accession numbers: HM439694--HM439716 (env-2), HM439716--HM439738 (env-1), HM439739--HM439762 (int)."	The paper provides the GenBank accession numbers for the sequenced HIV isolates	HM439694-HM439762
20621204	5	How many individuals had samples obtained for HIV sequencing?	2.1. Study population Sixty-one HIV-1 BF1 recombinant strains were identified after screening of a total of 1504 pr/rt sequences recovered from 1994 to 2005 in HIV-1 seropositive individuals from Rio de Janeiro State. All samples were classified in the pr/rt region in previous studies carried out in our laboratory.	The paper states that "screening of a total of 1504 pr/rt sequences recovered from 1994 to 2005 in HIV-1 seropositive individuals"	1504
20621204	6	From which countries were the sequenced samples obtained?	"Sixty-one HIV-1 BF1 recombinant strains were identified after screening of a total of 1504 pr/rt sequences recovered from 1994 to 2005 in HIV-1 seropositive individuals from Rio de Janeiro State. Analysis of HIV-1 BF pr/rt recombinant strains from Rio de Janeiro/Brazil reveals multiple unrelated mosaic structures"	The paper and the paper title states that the samples were obtained from Rio de Janeiro State, Brazil.	Brazil
20621204	7	From what years were the sequenced samples obtained?	"Sixty-one HIV-1 BF1 recombinant strains were identified after screening of a total of 1504 pr/rt sequences recovered from 1994 to 2005 in HIV-1 seropositive individuals from Rio de Janeiro State."	The paper mentions that the sequences were recovered from 1994 to 2005.	1994 to 2005
20621204	8	Were samples cloned prior to sequencing?	Purified DNA was sequenced by using the ABI BigDye Terminator version 3.1 cycle sequencing ready reaction kit (Applied Biosystem, CA, U.S.A.) and processed with an automated ABI 3100 Genetic Analyzer (Applied Biosystem, CA, U.S.A.).	The paper does not mention any cloning of samples prior to sequencing.	Not reported
20621204	9	Which HIV genes were reported to have been sequenced?	"The aim of this study was to investigate mosaic structure and phylogenetic relationship among several BF1 (protease--reverse transcriptase, pr/rt) recombinant sequences obtained from a group of patients from Rio de Janeiro, Brazil, from 1994 to 2005. Those samples presenting the same recombinant pattern in the pr/rt region were investigated in the integrase (int) and envelope (env) regions as a …	The paper mentions sequencing of the pr/rt region, integrase (int) region, and envelope (env) regions.	PR, RT, IN, Env
20621204	10	What method was used for sequencing?	Purified DNA was sequenced by using the ABI BigDye Terminator version 3.1 cycle sequencing ready reaction kit (Applied Biosystem, CA, U.S.A.) and processed with an automated ABI 3100 Genetic Analyzer (Applied Biosystem, CA, U.S.A.).	The paper mentions the use of the ABI BigDye Terminator version 3.1 cycle sequencing ready reaction kit and the ABI 3100 Genetic Analyzer, which are associated with Sanger sequencing.	Sanger sequencing
20621204	11	What type of samples were sequenced?	"Genomic DNA was extracted from whole blood of drug naïve patients using a DNA extraction column kit (QIAamp DNA Mini Blood Kit; QIAGEN, Valencia, CA) and sequencing using a home brew protocol method as described elsewhere. HIV-1 plasma RNA genotyping of pr/rt region of patients under highly active antiretroviral therapy were obtained using the ViroSeq HIV-1 Genotyping System protocol (Celera Dia…	The paper mentions that genomic DNA was extracted from whole blood and HIV-1 plasma RNA genotyping was performed.	Whole Blood; Plasma
20621204	12	Were any sequences obtained from individuals with virological failure on a treatment regimen?	Genomic DNA was extracted from whole blood of drug naïve patients using a DNA extraction column kit (QIAamp DNA Mini Blood Kit; QIAGEN, Valencia, CA) and sequencing using a home brew protocol method as described elsewhere (Eyer-Silva et al., 2007a, Eyer-Silva et al., 2007b, Maia Teixeira et al., 2006). HIV-1 plasma RNA genotyping of pr/rt region of patients under highly active antiretroviral ther…	The paper mentions that 82% of the BF1 samples were obtained from patients under highly active antiretroviral therapy (HAART), but didn't mention the individuals were with virological failure.	Not reported
20621204	13	Were the patients in the study in a clinical trial?	Sixty-one HIV-1 BF1 recombinant strains were identified after screening of a total of 1504 pr/rt sequences recovered from 1994 to 2005 in HIV-1 seropositive individuals from Rio de Janeiro State. All samples were classified in the pr/rt region in previous studies carried out in our laboratory (Couto-Fernandez et al., 2005, Eyer-Silva et al., 2007a, Eyer-Silva et al., 2007b, Maia Teixeira et al., …	The paper does not mention that the patients were part of a clinical trial.	No
20621204	14	Does the paper report HIV sequences from individuals who had previously received ARV drugs?	The BF1 samples were mostly obtained (82%) from patients under highly active antiretroviral therapy (HAART) collected from 2002 to 2005.	The paper mentions that 82% of the BF1 samples were obtained from patients under highly active antiretroviral therapy (HAART), indicating that these individuals had previously received ARV drugs.	Yes
20621204	15	Which drug classes were received by individuals in the study before sample sequencing?	HIV-1 plasma RNA genotyping of pr/rt region of patients under highly active antiretroviral therapy were obtained using the ViroSeq HIV-1 Genotyping System protocol	The paper does not specify the exact drugs received by individuals before sample sequencing.	Not reported
20621204	16	Which drugs were received by individuals in the study before sample sequencing?	HIV-1 plasma RNA genotyping of pr/rt region of patients under highly active antiretroviral therapy were obtained using the ViroSeq HIV-1 Genotyping System protocol	The paper does not specify the exact drugs received by individuals before sample sequencing.	Not reported
20643915	1	Does the paper report HIV sequences from patient samples?	"There were no changes in viral load and no tenofovir resistance in HIV seroconvertors. The HIV-1 *pol* gene was population sequenced by means of a certified ( 27 ) in-house assay. Viral RNA was extracted and a 1.7 kb fragment spanning the *po* l gene was amplified by nested PCR using the Expand Long Template PCR System (Roche Diagnostics), as described previously ( 27 )."	The paper mentions samples were population sequenced by in house assay. Viral RNA was extracted from the sample.	Yes
20643915	2	Does the paper report in vitro drug susceptibility data?	The CAPRISA 004 trial assessed effectiveness and safety of a 1% vaginal gel formulation of tenofovir, a nucleotide reverse transcriptase inhibitor, for the prevention of HIV acquisition in women. A double-blind, randomized controlled trial was conducted comparing tenofovir gel (n=445) with placebo gel (n=444) in sexually active, HIV-uninfected 18-40 year-old women in urban and rural KwaZulu-Natal…	The paper does not provide any in vitro drug susceptibility data. It focuses on the clinical trial of tenofovir gel for HIV prevention and does not include laboratory-based drug susceptibility testing.	No
20643915	3	Were sequences from the paper made publicly available?	No evidence	The paper does not mention any GenBank accession numbers for sequenced HIV isolates.	No
20643915	4	What were the GenBank accession numbers for sequenced HIV isolates?	No evidence	The paper does not mention any GenBank accession numbers for sequenced HIV isolates.	Not reported
20643915	5	How many individuals had samples obtained for HIV sequencing?	It is estimated that the HIV seroconvertors were exposed to gel episodically for about 3-4 weeks post-infection and the resistance assays (n=35) were performed on average 20 weeks after the estimated date of infection.	The paper mentions that resistance assays were performed on 35 indiciduals who were exposed to tenofovir gel early in acute HIV infection.	35
20643915	6	From which countries were the sequenced samples obtained?	"A double-blind, randomized controlled trial was conducted comparing tenofovir gel (n=445) with placebo gel (n=444) in sexually active, HIV-uninfected 18-40 year-old women in urban and rural KwaZulu-Natal, South Africa. Women were enrolled at an urban and a rural clinic in KwaZulu-Natal, South Africa, but the study was not designed to assess the effectiveness of tenofovir in each clinic separatel…	The study was conducted in KwaZulu-Natal, South Africa, and the samples were obtained from women enrolled in this region.	South Africa
20643915	7	From what years were the sequenced samples obtained?	"CAPRISA 004, a two-arm, double-blind, randomized, placebo-controlled trial, was conducted from May 2007 to March 2010. From May 2007 to January 2009, 2160 women were screened, 1085 were enrolled, of whom 889 were included in the analysis."	The study was conducted from May 2007 to March 2010, and the samples were obtained during this period.	2007-2010
20643915	8	Were samples cloned prior to sequencing?	PCR products were sequenced (codons 1-99 of protease and codons 1-350 of reverse transcriptase) using a BigDye Terminator v3.1 cycle sequencing kit and an ABI 3130XL DNA sequencer (Applied Biosystems, Foster City, CA, USA).	The paper does not mention any cloning of samples prior to sequencing. It describes the direct sequencing of PCR products.	Not reported
20643915	9	Which HIV genes were reported to have been sequenced?	"The HIV-1 *pol* gene was population sequenced by means of a certified ( 27 ) in-house assay. PCR products were sequenced (codons 1-99 of protease and codons 1-350 of reverse transcriptase) using a BigDye Terminator v3.1 cycle sequencing kit and an ABI 3130XL DNA sequencer (Applied Biosystems, Foster City, CA, USA)."	The paper mentions that the HIV-1 *pol* gene was sequenced, specifically codons 1-99 of protease and codons 1-350 of reverse transcriptase.	PR, RT
20643915	10	What method was used for sequencing?	PCR products were sequenced (codons 1-99 of protease and codons 1-350 of reverse transcriptase) using a BigDye Terminator v3.1 cycle sequencing kit and an ABI 3130XL DNA sequencer (Applied Biosystems, Foster City, CA, USA).	The paper mentions the use of a BigDye Terminator v3.1 cycle sequencing kit and an ABI 3130XL DNA sequencer, which are associated with Sanger sequencing.	Sanger sequencing
20643915	11	What type of samples were sequenced?	Stored plasma, available from prior study visits by each seroconvertor was tested by RNA PCR to identify the window period for HIV infection (RNA PCR positive but rapid HIV test negative) at prior visits. Viral RNA was extracted and a 1.7 kb fragment spanning the pol gene was amplified by nested PCR using the Expand Long Template PCR System (Roche Diagnostics), as described previously (27).	The paper mentions that stored plasma from prior study visits by each seroconvertor was tested, and the viral RNA as extracted and sequenced.	Plasma
20643915	12	Were any sequences obtained from individuals with virological failure on a treatment regimen?	"The CAPRISA 004 trial assessed effectiveness and safety of a 1% vaginal gel formulation of tenofovir, a nucleotide reverse transcriptase inhibitor, for the prevention of HIV acquisition in women. There were no changes in viral load and no tenofovir resistance in HIV seroconvertors."	The paper does not mention obtaining sequences from individuals with virological failure on a treatment regimen, the individuals used tenofovir gel	Not reported
20643915	13	Were the patients in the study in a clinical trial?	The CAPRISA 004 trial assessed effectiveness and safety of a 1% vaginal gel formulation of tenofovir, a nucleotide reverse transcriptase inhibitor, for the prevention of HIV acquisition in women. CAPRISA 004, a two-arm, double-blind, randomized, placebo-controlled trial, was conducted from May 2007 to March 2010.	The paper describes the CAPRISA 004 trial, which was a double-blind, randomized, placebo-controlled trial	Yes
20643915	14	Does the paper report HIV sequences from individuals who had previously received ARV drugs?	The CAPRISA 004 trial assessed effectiveness and safety of a 1% vaginal gel formulation of tenofovir, a nucleotide reverse transcriptase inhibitor, for the prevention of HIV acquisition in women. There were no changes in viral load and no tenofovir resistance in HIV seroconvertors.	The paper focuses on the prevention of HIV infection in women using tenofovir gel, tenofovir is an ARV drug.	Yes
20643915	15	Which drug classes were received by individuals in the study before sample sequencing?	"The CAPRISA 004 trial assessed effectiveness and safety of a 1% vaginal gel formulation of tenofovir, a nucleotide reverse transcriptase inhibitor, for the prevention of HIV acquisition in women. Tenofovir gel comprised 40mg of 9- \[(R)-2-phosphonomethoxy)propyl\]adenine monohydrate (PMPA) in a solution of purified water with edetate disodium, citric acid, glycerin, methylparaben, propylparaben,…	The paper involved the use of tenofovir, which is a nucleotide reverse transcriptase inhibitor (NRTI).	NRTI
20643915	16	Which drugs were received by individuals in the study before sample sequencing?	"he CAPRISA 004 trial assessed effectiveness and safety of a 1% vaginal gel formulation of tenofovir, a nucleotide reverse transcriptase inhibitor, for the prevention of HIV acquisition in women. Tenofovir gel comprised 40mg of 9- \[(R)-2-phosphonomethoxy)propyl\]adenine monohydrate (PMPA) in a solution of purified water with edetate disodium, citric acid, glycerin, methylparaben, propylparaben, …	The paper involved the use of tenofovir gel, which contains tenofovir, a nucleotide reverse transcriptase inhibitor.	Tenofovir (TFV)
20660667	1	Does the paper report HIV sequences from patient samples?	"The Virco Antivirogram assay was used to determine susceptibility against a panel of 191 HIV-1 isolates derived from the plasma of treatment-naïve and antiretroviral-treatment-experienced individuals chosen to identify a comprehensive phenotypic resistance profile for lersivirine."	The paper mentions that the Virco Antivirogram assay was used to determine susceptibility against a panel of 191 HIV-1 isolates derived from the plasma of treatment-naïve and antiretroviral-treatment-experienced individuals. This indicates that HIV sequences from patient samples were reported.	Yes
20660667	2	Does the paper report in vitro drug susceptibility data?	Phenotypic resistance profiling. Drug susceptibility was determined using cell-based pseudovirus assays at Virco (Antivirogram assay; Mechelen, Belgium) and Monogram Biosciences Inc. (PhenoSense HIV assay; South San Francisco, CA). The Virco Antivirogram assay was used to determine susceptibility against a panel of 191 HIV-1 isolates derived from the plasma of treatment-naïve and antiretroviral-t…	The paper mentions the use of Antivirogram assay and Phenosense assay to determine susceptibility of Lersivirine.	Yes
20660667	3	Were sequences from the paper made publicly available?	Protein Data Bank accession numbers. Coordinates and reflection files were deposited in the Protein Data Bank under accession numbers 2 won and 2 wom.	The paper does not provide any GenBank accession numbers for sequenced HIV isolates, only the protein data bank. It mentions the use of specific HIV-1 strains and mutants but does not include accession numbers.	No
20660667	4	What were the GenBank accession numbers for sequenced HIV isolates?	Protein Data Bank accession numbers. Coordinates and reflection files were deposited in the Protein Data Bank under accession numbers 2 won and 2 wom.	The paper does not provide any GenBank accession numbers for sequenced HIV isolates, only the protein data bank. It mentions the use of specific HIV-1 strains and mutants but does not include accession numbers.	Not reported
20660667	5	How many individuals had samples obtained for HIV sequencing?	The Virco Antivirogram assay was used to determine susceptibility against a panel of 191 HIV-1 isolates derived from the plasma of treatment-naïve and antiretroviral-treatment-experienced individuals chosen to identify a comprehensive phenotypic resistance profile for lersivirine. Three different virus panels were investigated at Monogram Biosciences using the PhenoSense HIV assay: 100 HIV-1 isol…	The paper mentions that the Virco Antivirogram assay was used to determine susceptibility against a panel of 191 HIV-1 isolates derived from the plasma of treatment-naïve and antiretroviral-treatment-experienced individuals.	191
20660667	6	From which countries were the sequenced samples obtained?	No evidence	The sequenced samples in this study were obtained in vitro, meaning they were not sourced from patient isolates from any particular country.	Not reported
20660667	7	From what years were the sequenced samples obtained?	No evidence	The paper does not provide specific years for when the sequenced samples were obtained.	Not reported
20660667	8	Were samples cloned prior to sequencing?	Site-directed mutants. DNA encoding the histidine-tagged reverse transcriptase (RT) (p66) and protease genes (HIV-1, BH10 strain) were cloned into the expression vector pT5m and kindly provided by Stephen Hughes (19). Specific amino acid replacements were made using the QuikChange site-directed mutagenesis kit (Stratagene). Following mutagenesis, the entire mutant RT coding sequence was verified …	The paper describes the use of site-direted mutants, which means the samples were not from clinical isolates. It didn't mention if the samples were cloned.	Not reported
20660667	9	Which HIV genes were reported to have been sequenced?	"DNA encoding the histidine-tagged reverse transcriptase (RT) (p66) and protease genes (HIV-1, BH10 strain) were cloned into the expression vector pT5m and kindly provided by Stephen Hughes. Following mutagenesis, the entire mutant RT coding sequence was verified by sequencing the corresponding plasmids."	The paper mentions the sequencing of the reverse transcriptase (RT) and protease (PR) genes of HIV-1. Specific amino acid replacements were made in the RT gene, and the RT and protease genes were cloned into expression vectors for further analysis.	PR, RT
20660667	10	What method was used for sequencing?	Site-directed mutants. DNA encoding the histidine-tagged reverse transcriptase (RT) (p66) and protease genes (HIV-1, BH10 strain) were cloned into the expression vector pT5m and kindly provided by Stephen Hughes (19). Specific amino acid replacements were made using the QuikChange site-directed mutagenesis kit (Stratagene). Following mutagenesis, the entire mutant RT coding sequence was verified …	The paper describes the use of site-direted mutants, which means the samples were not from clinical isolates. The sequencing method is not reported.	Not reported
20660667	11	What type of samples were sequenced?	Peripheral blood mononuclear cells (PBMCs) were isolated by Ficoll-Paque gradient separation (Amersham Pharmacia Biotech, Piscataway, NJ) from pooled buffy coats (North London and South London Blood Transfusion Services, United Kingdom) from three or four HIV-1- and hepatitis B virus-seronegative donors per batch. The Virco Antivirogram assay was used to determine susceptibility against a panel o…	The paper mentions that PBMCs were isolated from three or four HIV-1 virus-seronegative donors. And 191 HIV-1 isolates derived from the plasma of treatment-naïve and antiretroviral-treatment-experienced individuals.	Plasma, PBMC
20660667	12	Were any sequences obtained from individuals with virological failure on a treatment regimen?	The Virco Antivirogram assay was used to determine susceptibility against a panel of 191 HIV-1 isolates derived from the plasma of treatment-naïve and antiretroviral-treatment-experienced individuals chosen to identify a comprehensive phenotypic resistance profile for lersivirine. Three different virus panels were investigated at Monogram Biosciences using the PhenoSense HIV assay: 100 HIV-1 isol…	The paper mentions that the Virco Antivirogram assay was used to determine susceptibility against a panel of 191 HIV-1 isolates derived from the plasma of treatment-naïve and antiretroviral-treatment-experienced individuals. Among them 100 HIV-1 isolates derived from NNRTI treatment-experienced patients failing on a PI regimen, which means 100 samples were from individuals with virological failur…	Yes
20660667	13	Were the patients in the study in a clinical trial?	No evidence	The paper does not mention that the patients from whom the sequences were obtained were part of a clinical trial.	Not reported
20660667	14	Does the paper report HIV sequences from individuals who had previously received ARV drugs?	The Virco Antivirogram assay was used to determine susceptibility against a panel of 191 HIV-1 isolates derived from the plasma of treatment-naïve and antiretroviral-treatment-experienced individuals chosen to identify a comprehensive phenotypic resistance profile for lersivirine.	The paper mentions 191 HIV-1 isolates derived from the plasma of treatment-naïve and antiretroviral-treatment-experienced individuals, which includes those who had previously received ARV drugs.	Yes
20660667	15	Which drug classes were received by individuals in the study before sample sequencing?	The Virco Antivirogram assay was used to determine susceptibility against a panel of 191 HIV-1 isolates derived from the plasma of treatment-naïve and antiretroviral-treatment-experienced individuals chosen to identify a comprehensive phenotypic resistance profile for lersivirine. Three different virus panels were investigated at Monogram Biosciences using the PhenoSense HIV assay: 100 HIV-1 isol…	The paper reported that 100 HIV-1 isolates derived from NNRTI treatment-experienced patients failing on a PI regimen, which means they were treated with NNRTI, and PI.	NNRTI, PI
20660667	16	Which drugs were received by individuals in the study before sample sequencing?	The Virco Antivirogram assay was used to determine susceptibility against a panel of 191 HIV-1 isolates derived from the plasma of treatment-naïve and antiretroviral-treatment-experienced individuals chosen to identify a comprehensive phenotypic resistance profile for lersivirine. Three different virus panels were investigated at Monogram Biosciences using the PhenoSense HIV assay: 100 HIV-1 isol…	The paper reported that 100 HIV-1 isolates derived from NNRTI treatment-experienced patients failing on a PI regimen, which means they were treated with NNRTI, and PI, but specific drugs were not mentioned.	Not reported
20660676	1	Does the paper report HIV sequences from patient samples?	"In vitro drug susceptibility results were available for 2,725 isolates, including 2,643 from 2,439 individuals and 82 mutant laboratory isolates."	The paper mentions that 2,643 HIV-1 isolates were obtained from 2,439 individuals, indicating that the sequences were derived from patient samples.	Yes
20660676	2	Does the paper report in vitro drug susceptibility data?	We analyzed in vitro susceptibility test results on 2,725 HIV-1 protease isolates. More than 2,400 isolates had been tested for susceptibility to fosamprenavir, indinavir, nelfinavir, and saquinavir; 2,130 isolates had been tested for susceptibility to lopinavir; 1,644 isolates had been tested for susceptibility to atazanavir; 1,265 isolates had been tested for susceptibility to tipranavir; and 6…	The paper is a review of in vitro drug mutation and susceptability data and does not report any new susceptability data.	Yes
20660676	3	Were sequences from the paper made publicly available?	No evidence	The paper would not have sequences to be submitted to GenBank because it primarily deals with the phenotypic effects of existing mutations on PI susceptibility, using in vitro test results and statistical analyses. The study does not generate new sequence data for submission to GenBank, as its contributions are centered on understanding the impact of known mutations through phenotypic and statist…	No
20660676	4	What were the GenBank accession numbers for sequenced HIV isolates?	No evidence	The paper would not have sequences to be submitted to GenBank because it primarily deals with the phenotypic effects of existing mutations on PI susceptibility, using in vitro test results and statistical analyses. The study does not generate new sequence data for submission to GenBank, as its contributions are centered on understanding the impact of known mutations through phenotypic and statist…	Not reported
20660676	5	How many individuals had samples obtained for HIV sequencing?	"In vitro drug susceptibility results were available for 2,725 isolates, including 2,643 from 2,439 individuals and 82 mutant laboratory isolates."	The paper states that in vitro drug susceptibility results were available for 2,725 isolates, including 2,643 from 2,439 individuals.	2439
20660676	6	From which countries were the sequenced samples obtained?	No evidence	The sequenced samples in this study were obtained in vitro, meaning they were not sourced from patient isolates from any specific country.	Not reported
20660676	7	From what years were the sequenced samples obtained?	No evidence	The paper does not provide information on the years during which the sequenced samples were obtained.	Not reported
20660676	8	Were samples cloned prior to sequencing?	No evidence	The paper does not mention that samples were cloned prior to sequencing.	Not reported
20660676	9	Which HIV genes were reported to have been sequenced?	"We analyzed in vitro susceptibility test results on 2,725 HIV-1 protease isolates. We applied least-angle regression (LARS) to the 200 most common mutations in the data set and identified a set of 46 mutations associated with decreased PI susceptibility of which 40 were not polymorphic in the eight most common HIV-1 group M subtypes."	The paper focuses on mutations in the HIV-1 protease gene and their impact on protease inhibitor susceptibility.	PR
20660676	10	What method was used for sequencing?	No evidence	The paper does not specify the sequencing method used for the HIV-1 isolates.	Not reported
20660676	11	What type of samples were sequenced?	No evidence	The paper does not specify the type of clinical specimens that were sequenced.	Not reported
20660676	12	Were any sequences obtained from individuals with virological failure on a treatment regimen?	HIV-1 Protease Mutations and Protease Inhibitor Cross-Resistance. We analyzed in vitro susceptibility test results on 2,725 HIV-1 protease isolates. The effects of many protease inhibitor (PI)-selected mutations on the susceptibility to individual PIs are unknown.	The paper mentions many protease inhibitor (PI)-selected mutations from HIV-1 protease isolates, but doesn't mention the treatment history.	Not reported
20660676	13	Were the patients in the study in a clinical trial?	HIV-1 isolates. We analyzed HIV-1 isolates in the HIV Drug Resistance Database (HIVDB) (40) for which cell-based in vitro PI susceptibility testing had been performed by the PhenoSense (Monogram, South San Francisco, CA) (38) or Antivirogram (Virco, Mechelin, Belgium) (19) assays. Seventy percent of the test results were obtained from published studies, and 30% were obtained from virus samples co…	The paper mentioned the isolates were from HIV Drug Resistance Database (HIVDB), which means non of the samples were from clinical trials.	Not reported
20660676	14	Does the paper report HIV sequences from individuals who had previously received ARV drugs?	We analyzed in vitro susceptibility test results on 2,725 HIV-1 protease isolates. More than 2,400 isolates had been tested for susceptibility to fosamprenavir, indinavir, nelfinavir, and saquinavir; 2,130 isolates had been tested for susceptibility to lopinavir; 1,644 isolates had been tested for susceptibility to atazanavir; 1,265 isolates had been tested for susceptibility to tipranavir; and 6…	The paper discusses the susceptibility of HIV-1 protease isolates to various protease inhibitors, but it doesn't mean that sequences were from individuals who had received these drugs before.	Not reported
20660676	15	Which drug classes were received by individuals in the study before sample sequencing?	We analyzed in vitro susceptibility test results on 2,725 HIV-1 protease isolates. More than 2,400 isolates had been tested for susceptibility to fosamprenavir, indinavir, nelfinavir, and saquinavir; 2,130 isolates had been tested for susceptibility to lopinavir; 1,644 isolates had been tested for susceptibility to atazanavir; 1,265 isolates had been tested for susceptibility to tipranavir; and 6…	The paper indicates that the study is about phenotypic susceptibility test, and is a review paper, and the treatment history was not provided, it didn't report the treatment history.	Not reported
20660676	16	Which drugs were received by individuals in the study before sample sequencing?	We analyzed in vitro susceptibility test results on 2,725 HIV-1 protease isolates. More than 2,400 isolates had been tested for susceptibility to fosamprenavir, indinavir, nelfinavir, and saquinavir; 2,130 isolates had been tested for susceptibility to lopinavir; 1,644 isolates had been tested for susceptibility to atazanavir; 1,265 isolates had been tested for susceptibility to tipranavir; and 6…	The paper indicates that the study is about phenotypic susceptibility test, and is a review paper, and the treatment history was not provided, it didn't report the treatment history.	Not reported
20666602	1	Does the paper report HIV sequences from patient samples?	Viral sequences spanning the full protease and the first 400 amino acids of the RT from 3 different studies were pooled for this analysis: 351 sequences from the ACTG 320 trial, 1188 sequences from the Swiss HIV Cohort Study (SHCS), and 11 sequences from a lamivudine monotherapy trial.	The paper mentions that viral sequences spanning the full protease and the first 400 amino acids of the RT from 3 different studies were pooled for analysis. This indicates that HIV sequences from patient samples were reported.	Yes
20666602	2	Does the paper report in vitro drug susceptibility data?	The emergence of connection domain mutations was studied in 334 patients receiving monotherapy or dual therapy with thymidine analogues at the time of the genotypic resistance test. Response to subsequent combination ART (cART) was analyzed using Cox regression for 291 patients receiving unboosted protease inhibitors. Response was defined by ever reaching an HIV RNA level <50 copies/mL during the…	The paper focuses on the genotypic resistance tests and the emergence of connection domain mutations in patients receiving ART. It does not mention any in vitro drug susceptibility assays or data.	No
20666602	3	Were sequences from the paper made publicly available?	1188 sequences from the Swiss HIV Cohort Study (SHCS) (GenBank accession nos. of sequences used for the present study: GQ848100-GQ848156), and 11 sequences from a lamivudine monotherapy trial (GenBank accession nos. GU301078-GU301088).	The paper provides specific GenBank accession numbers for the sequences used in the study. These numbers are listed in the Methods section.	Yes
20666602	4	What were the GenBank accession numbers for sequenced HIV isolates?	1188 sequences from the Swiss HIV Cohort Study (SHCS) (GenBank accession nos. of sequences used for the present study: GQ848100-GQ848156), and 11 sequences from a lamivudine monotherapy trial (GenBank accession nos. GU301078-GU301088).	The paper provides specific GenBank accession numbers for the sequences used in the study. These numbers are listed in the Methods section.	GQ848100-GQ848156, GU301078-GU301088
20666602	5	How many individuals had samples obtained for HIV sequencing?	The emergence of connection domain mutations was studied in 334 patients receiving monotherapy or dual therapy with thymidine analogues at the time of the genotypic resistance test.	The paper states that the emergence of connection domain mutations was studied in 334 patients, indicating that samples were obtained from 334 individuals.	334
20666602	6	From which countries were the sequenced samples obtained?	Viral sequences spanning the full protease and the first 400 amino acids of the RT from 3 different studies were pooled for this analysis: 351 sequences from the ACTG 320 trial ( http://hivdb.stanford.edu/pages/clinicalStudyData/ACTG320.html ) [ 21 , 22 ], 1188 sequences from the Swiss HIV Cohort Study (SHCS) (GenBank accession nos. of sequences used for the present study: GQ848100-GQ848156) [ 23…	The sequenced samples in this study were obtained from three different sources: the ACTG 320 trial, the Swiss HIV Cohort Study (SHCS), and a lamivudine monotherapy trial. This means some samples were from Switzerland	Switzerland
20666602	7	From what years were the sequenced samples obtained?	No evidence	The paper does not provide specific information about the years from which the sequenced samples were obtained.	Not reported
20666602	8	Were samples cloned prior to sequencing?	No evidence	The paper does not mention any cloning of samples prior to sequencing.	Not reported
20666602	9	Which HIV genes were reported to have been sequenced?	Viral sequences spanning the full protease and the first 400 amino acids of the RT from 3 different studies were pooled for this analysis.	The paper mentions that viral sequences spanning the full protease and the first 400 amino acids of the RT were analyzed. This indicates that the protease and reverse transcriptase genes were sequenced.	PR, RT
20666602	10	What method was used for sequencing?	No evidence	The paper does not specify the sequencing method used for the viral sequences.	Not reported
20666602	11	What type of samples were sequenced?	The clinical relevance of connection domain mutations in patients receiving the first cART consisting of 2 drug classes was evaluated using 2 separate analyses: the first assessed virological failure, defined as either nonresponse (>500 HIV RNA copies/mL at week 24) or a later rebound of viremia to levels >500 copies/mL, and the second assessed response to treatment, defined as achieving a viral …	The paper mentioned the study accessed the virological failure, which indicates the sample could be collected from plasma.	Not reported
20666602	12	Were any sequences obtained from individuals with virological failure on a treatment regimen?	The clinical relevance of connection domain mutations in patients receiving the first cART consisting of 2 drug classes was evaluated using 2 separate analyses: the first assessed virological failure, defined as either nonresponse (>500 HIV RNA copies/mL at week 24) or a later rebound of viremia to levels >500 copies/mL, and the second assessed response to treatment, defined as achieving a viral …	The paper mentioned the study accessed the virological failure.	Yes
20666602	13	Were the patients in the study in a clinical trial?	351 sequences from the ACTG 320 trial, and 11 sequences from a lamivudine monotherapy trial.	The paper mentions that sequences were obtained from the ACTG 320 trial and a lamivudine monotherapy trial, indicating that some patients were part of clinical trials.	Yes
20666602	14	Does the paper report HIV sequences from individuals who had previously received ARV drugs?	The emergence of connection domain mutations was studied in 334 patients receiving monotherapy or dual therapy with thymidine analogues at the time of the genotypic resistance test. Viral sequences spanning the full protease and the first 400 amino acids of the RT from 3 different studies were pooled for this analysis: 351 sequences from the ACTG 320 trial (http://hivdb.stanford.edu/pages/clinica…	The paper mentions that the sequences were obtained from 334 patients receiving monotherapy or dual therapy with thymidine analogue treatment, which means they had received ARV drugs	Yes
20666602	15	Which drug classes were received by individuals in the study before sample sequencing?	From this data set, we selected subtype B sequences that were obtained while patients were receiving ART with thymidine analogue treatment (with or without lamivudine or didanosine), provided that the patient had never taken NNRTI or PI drugs at the time of genotypic testing (n=334). As a sensitivity analysis, we repeated all statistical calculations on a data set restricted to tests performed wh…	The paper mentions that the patients were receiving ART with thymidine analogue treatment, and were receiving zidovudine, zidovudine-lamivudine, or zidovudine-didanosine as the first ART, which are NRTI class drugs. Failure analysis included PI treated patients. Additional 40 patients for another anslysis received the first NNRTI treatment.	NRTI, NNRTI, PI
20666602	16	Which drugs were received by individuals in the study before sample sequencing?	From this data set, we selected subtype B sequences that were obtained while patients were receiving ART with thymidine analogue treatment (with or without lamivudine or didanosine). As a sensitivity analysis, we repeated all statistical calculations on a data set restricted to tests performed while patients were receiving zidovudine, zidovudine-lamivudine, or zidovudine-didanosine as the first A…	The paper mentions that the patients were receiving ART with zidovudine, lamivudine, or didanosine.	Zidovudine (AZT), Lamivudine (3TC), Didanosine (DDI)
20692295	1	Does the paper report HIV sequences from patient samples?	"Briefly, viral RNA was extracted from patient plasma samples. Of 2573 plasma samples collected during the study period, the sequences of PR and RT genes were successfully amplified and analyzed in 2536 (98.6%) and 2534 (98.5%) samples, respectively."	The paper mentions that HIV-1 sequences were obtained from patient plasma samples. Specifically, it states that viral RNA was extracted from patient plasma samples and that the sequences of the PR and RT genes were analyzed.	Yes
20692295	2	Does the paper report in vitro drug susceptibility data?	Trends in transmitted drug-resistant HIV-1 and demographic characteristics of newly diagnosed patients: Nationwide surveillance from 2003 to 2008 in Japan	The paper focuses on the genotypic analysis of drug resistance mutations in HIV-1 sequences obtained from patient samples. It does not mention performing in vitro drug susceptibility assays to determine the phenotypic resistance of the virus to antiretroviral drugs.	No
20692295	3	Were sequences from the paper made publicly available?	No evidence	The paper does not provide any GenBank accession numbers for the sequenced HIV isolates. It focuses on the analysis of drug resistance mutations and the epidemiology of HIV-1 in Japan.	No
20692295	4	What were the GenBank accession numbers for sequenced HIV isolates?	No evidence	The paper does not provide any GenBank accession numbers for the sequenced HIV isolates. It focuses on the analysis of drug resistance mutations and the epidemiology of HIV-1 in Japan.	Not reported
20692295	5	How many individuals had samples obtained for HIV sequencing?	"In the 6-year study period, the prevalence of drug-resistant HIV-1 among 2573 patients, consisting mainly of Japanese men in their late-30s and infected through male-to-male sexual contacts, followed an increasing trend from 5.9% (16/273) in 2003 to 8.3% (50/605) in 2008. The demographics of the 2573 newly diagnosed HIV-1-infected patients enrolled between 2003 and 2008 are summarized in Table 1…	The paper states that 2573 newly diagnosed HIV-1-infected patients were enrolled in the study, and plasma samples were collected from these individuals for sequencing.	2573
20692295	6	From which countries were the sequenced samples obtained?	Trends in transmitted drug-resistant HIV-1 and demographic characteristics of newly diagnosed patients: Nationwide surveillance from 2003 to 2008 in Japan. We conducted an epidemiological study enrolling newly diagnosed patients between 2003 and 2008 in our nationwide surveillance network. In the 6-year study period, the prevalence of drug-resistant HIV-1 among 2573 patients, consisting mainly of…	The paper mentions that samples were obtained from newly diagnosed HIV-1-infected patients in Japan.	Japan
20692295	7	From what years were the sequenced samples obtained?	"We conducted an epidemiological study enrolling newly diagnosed patients between 2003 and 2008 in our nationwide surveillance network. The study population included all the HIV-1-infected patients newly diagnosed between January 2003 and December 2008 at any of the participating HIV/AIDS clinics."	The paper states that the study was conducted over a 6-year period from 2003 to 2008. The samples were obtained from patients newly diagnosed with HIV-1 during this time frame.	2003-2008
20692295	8	Were samples cloned prior to sequencing?	Drug resistance genotypic testing was performed using in-house protocols. Briefly, viral RNA was extracted from patient plasma samples. HIV-1 protease (PR, 1–99 amino acids) and the N-terminal region of reverse transcriptase (RT, 1–240 amino acids) were amplified in reverse transcription polymerase chain reaction (RT-PCR) followed by nested PCR using in-house primer sets. Subsequently, the amplif…	The paper does not mention that the samples were cloned prior to sequencing. It describes the use of direct sequencing of PCR products, which is a different method.	Not reported
20692295	9	Which HIV genes were reported to have been sequenced?	"HIV-1 protease (PR, 1--99 amino acids) and the N-terminal region of reverse transcriptase (RT, 1--240 amino acids) were amplified in reverse transcription polymerase chain reaction (RT-PCR) followed by nested PCR using in-house primer sets. Of 2573 plasma samples collected during the study period, the sequences of PR and RT genes were successfully amplified and analyzed in 2536 (98.6%) and 2534 …	The paper reports that the HIV-1 protease (PR) and the N-terminal region of reverse transcriptase (RT) genes were sequenced. These sequences were used to determine drug resistance mutations and HIV-1 subtypes.	PR, RT
20692295	10	What method was used for sequencing?	"Subsequently, the amplified PCR products were purified and their sequences were analyzed by direct sequencing method using an automated sequencer. The resulting electropherograms were analyzed using commercially available software.	The paper describes the sequencing method as a direct sequencing method using an automated sequencer and electropherograms, which is characteristic of Sanger sequencing.	Sanger sequencing
20692295	11	What type of samples were sequenced?	Drug resistance genotypic testing was performed using in-house protocols. Briefly, viral RNA was extracted from patient plasma samples. Of 2573 plasma samples collected during the study period, the sequences of PR and RT genes were successfully amplified and analyzed in 2536 (98.6%) and 2534 (98.5%) samples, respectively.	The paper specifies that viral RNA was extracted from patient plasma samples for sequencing.	Plasma
20692295	12	Were any sequences obtained from individuals with virological failure on a treatment regimen?	We conducted an epidemiological study enrolling newly diagnosed patients between 2003 and 2008 in our nationwide surveillance network. The demographics of the 2573 newly diagnosed HIV-1-infected patients enrolled between 2003 and 2008 are summarized in Table 1. Trends in transmitted drug-resistant HIV-1 and demographic characteristics of newly diagnosed patients: Nationwide surveillance from 2003…	The paper focuses on newly diagnosed, treatment-naïve patients, which means they were treatment naïve, and the sequences were not from individuals with virological failure on a treatment regimen.	No
20692295	13	Were the patients in the study in a clinical trial?	We conducted an epidemiological study enrolling newly diagnosed patients between 2003 and 2008 in our nationwide surveillance network. After patients agreed to participate in our surveillance project and gave informed consent, peripheral blood was drawn with EDTA added, and their demographic and clinical information were collected.	The paper describes the study as an epidemiological surveillance study, which means the patients were not in a clinical trial.	No
20692295	14	Does the paper report HIV sequences from individuals who had previously received ARV drugs?	We conducted an epidemiological study enrolling newly diagnosed patients between 2003 and 2008 in our nationwide surveillance network. The demographics of the 2573 newly diagnosed HIV-1-infected patients enrolled between 2003 and 2008 are summarized in Table 1.	The paper focuses on newly diagnosed, treatment-naïve patients, so none of them had previously received antiretroviral (ARV) drugs.	No
20692295	15	Which drug classes were received by individuals in the study before sample sequencing?	We conducted an epidemiological study enrolling newly diagnosed patients between 2003 and 2008 in our nationwide surveillance network. The demographics of the 2573 newly diagnosed HIV-1-infected patients enrolled between 2003 and 2008 are summarized in Table 1. Trends in transmitted drug-resistant HIV-1 and demographic characteristics of newly diagnosed patients: Nationwide surveillance from 2003…	The paper focuses on newly diagnosed, treatment-naïve patients, so they had not received any specific antiretroviral drugs before sample sequencing.	None
20692295	16	Which drugs were received by individuals in the study before sample sequencing?	We conducted an epidemiological study enrolling newly diagnosed patients between 2003 and 2008 in our nationwide surveillance network. The demographics of the 2573 newly diagnosed HIV-1-infected patients enrolled between 2003 and 2008 are summarized in Table 1. Trends in transmitted drug-resistant HIV-1 and demographic characteristics of newly diagnosed patients: Nationwide surveillance from 2003…	The paper focuses on newly diagnosed, treatment-naïve patients, so they had not received any specific antiretroviral drugs before sample sequencing.	None
20702636	1	Does the paper report HIV sequences from patient samples?	"Viral RNA was isolated from plasma by use of a QIAamp Viral RNA Mini kit from Qiagen (Valencia). Gag-protease sequences obtained in this study are available in the GenBank database under accession numbers HM593106 to HM593510."	The paper mentions that viral RNA was isolated from plasma samples of patients, and Gag-protease sequences were obtained from these samples. This indicates that HIV sequences were derived from patient samples.	Yes
20702636	2	Does the paper report in vitro drug susceptibility data?	This study was undertaken to investigate, at the population level, the impact of HLA-mediated immune pressure in Gag on viral fitness and its influence on HIV-1 pathogenesis. Replication capacities of 406 recombinant viruses encoding plasma-derived Gag-protease from patients chronically infected with HIV-1 subtype C were assayed in an HIV-1-inducible green fluorescent protein reporter cell line. …	The paper focuses on the replication capacities of recombinant viruses and their association with HLA types and clinical parameters. There is no mention of in vitro drug susceptibility testing or data.	No
20702636	3	Were sequences from the paper made publicly available?	"Gag-protease sequences obtained in this study are available in the GenBank database under accession numbers HM593106 to HM593510."	The paper explicitly states that the Gag-protease sequences obtained in the study are available in the GenBank database under the accession numbers HM593106 to HM593510.	Yes
20702636	4	What were the GenBank accession numbers for sequenced HIV isolates?	"Gag-protease sequences obtained in this study are available in the GenBank database under accession numbers HM593106 to HM593510."	The paper explicitly states that the Gag-protease sequences obtained in the study are available in the GenBank database under the accession numbers HM593106 to HM593510.	HM593106 to HM593510
20702636	5	How many individuals had samples obtained for HIV sequencing?	"The study subjects included 406 antiretroviral-naïve individuals chronically infected with HIV-1 subtype C from the Sinikithemba cohort in Durban, South Africa."	The paper states that the study included 406 antiretroviral-naïve individuals with know subtype C infection from whom samples were obtained for sequencing.	406
20702636	6	From which countries were the sequenced samples obtained?	"The study subjects included 406 antiretroviral-naïve individuals chronically infected with HIV-1 subtype C from the Sinikithemba cohort in Durban, South Africa."	The paper specifies that the study subjects were from the Sinikithemba cohort in Durban, South Africa, indicating that the sequenced samples were obtained from this country.	South Africa
20702636	7	From what years were the sequenced samples obtained?	No evidence	The paper does not provide specific years during which the samples were obtained. It mentions the duration of follow-up but not the exact years of sample collection.	Not reported
20702636	8	Were samples cloned prior to sequencing?	"The Gag-protease PCR product was diluted 1:15 in DEPC-treated water and population sequenced using Big Dye Terminator ready reaction mix V3 (Applied Biosystems, Foster City, CA) and the following sequencing primers."	The paper does not mention any cloning of samples prior to sequencing.	No
20702636	9	Which HIV genes were reported to have been sequenced?	"Patient Gag-protease was isolated and inserted into an NL4-3 backbone to generate recombinant viruses. Sequencing of Gag-protease gene."	The paper describes the sequencing of the Gag-protease region of the HIV genome, indicating that both the Gag and Protease genes were sequenced.	Gag, PR
20702636	10	What method was used for sequencing?	"The Gag-protease PCR product was diluted 1:15 in DEPC-treated water and population sequenced using Big Dye Terminator ready reaction mix V3 (Applied Biosystems, Foster City, CA) and the following sequencing primers. Sequences were analyzed on an ABI 3130xl genetic analyzer (Applied Biosystems) and were visualized and edited in Sequencher 4.8."	The paper describes the use of Big Dye Terminator ready reaction mix V3 and an ABI 3130xl genetic analyzer, which are components of Sanger sequencing.	Sanger sequencing
20702636	11	What type of samples were sequenced?	Viral RNA was isolated from plasma by use of a QIAamp Viral RNA Mini kit from Qiagen (Valencia). Replication capacities of 406 recombinant viruses encoding plasma-derived Gag-protease from patients chronically infected with HIV-1 subtype C were assayed in an HIV-1-inducible green fluorescent protein reporter cell line. To test whether recombinant viruses were representative of the original plasma…	The paper specifies that viral RNA was isolated from plasma samples, indicating that plasma was the clinical specimen sequenced.	Plasma
20702636	12	Were any sequences obtained from individuals with virological failure on a treatment regimen?	The study subjects included 406 antiretroviral-naïve individuals chronically infected with HIV-1 subtype C from the Sinikithemba cohort in Durban, South Africa.	The paper subjects were antiretroviral-naïve individuals, meaning they had not received treatment, and thus hadn't experienced virological failure on a treatment regimen.	No
20702636	13	Were the patients in the study in a clinical trial?	The study subjects included 406 antiretroviral-naïve individuals chronically infected with HIV-1 subtype C from the Sinikithemba cohort in Durban, South Africa.	The paper does not mention that the patients were in a clinical trial. They were chronically infected.	No
20702636	14	Does the paper report HIV sequences from individuals who had previously received ARV drugs?	The study subjects included 406 antiretroviral-naïve individuals chronically infected with HIV-1 subtype C from the Sinikithemba cohort in Durban, South Africa.	The paper subjects were antiretroviral-naïve, meaning they had not previously received ARV drugs.	No
20702636	15	Which drug classes were received by individuals in the study before sample sequencing?	The study subjects included 406 antiretroviral-naïve individuals chronically infected with HIV-1 subtype C from the Sinikithemba cohort in Durban, South Africa.	The paper subjects were antiretroviral-naïve, meaning they had not received any drugs before sample sequencing.	None
20702636	16	Which drugs were received by individuals in the study before sample sequencing?	The study subjects included 406 antiretroviral-naïve individuals chronically infected with HIV-1 subtype C from the Sinikithemba cohort in Durban, South Africa.	The paper subjects were antiretroviral-naïve, meaning they had not received any drugs before sample sequencing.	None
20718620	1	Does the paper report HIV sequences from patient samples?	"In this study, HIV strains circulating among military personnel were characterized, in Malabo, the capital city of Equatorial Guinea. Blood samples were collected in EDTA tubes using standard methods from informed consenting volunteers from the military services in Malabo, the capital city, and surroundings. Forty-nine HIV-1-positive samples, for which sufficient plasma was left, were further ch…	The paper describes the collection and analysis of HIV sequences from patient samples. Specifically, it mentions that blood samples were collected from military personnel in Malabo, Equatorial Guinea, and that these samples were used to characterize HIV strains and analyze drug resistance mutations.	Yes
20718620	2	Does the paper report in vitro drug susceptibility data?	In this study, HIV strains circulating among military personnel were characterized, in Malabo, the capital city of Equatorial Guinea. One sample was found to be HIV-2 group A while a high degree of genetic diversity was recorded in the pol region of 41 HIV-1-positive samples. Analysis of antiretroviral drug resistance mutations revealed two patients each harboring one major mutation, M46I in prot…	The paper does not mention any in vitro drug susceptibility testing.	No
20718620	3	Were sequences from the paper made publicly available?	"The sequences described in this article have been deposited in the EMBL Nucleotide Sequence Database under accession numbers FN557303 to FN557343."	The paper explicitly states that the sequences described in the article have been deposited in the EMBL Nucleotide Sequence Database under the accession numbers FN557303 to FN557343.	Yes
20718620	4	What were the GenBank accession numbers for sequenced HIV isolates?	"The sequences described in this article have been deposited in the EMBL Nucleotide Sequence Database under accession numbers FN557303 to FN557343."	The paper explicitly states that the sequences described in the article have been deposited in the EMBL Nucleotide Sequence Database under the accession numbers FN557303 to FN557343.	FN557303 to FN557343
20718620	5	How many individuals had samples obtained for HIV sequencing?	Among the 48 HIV-1 group M samples, 41 were successfully amplified and sequenced.	Paper mentioned " 41 were successfully amplified and sequenced."	41
20718620	6	From which countries were the sequenced samples obtained?	"HIV Type 1 pol Gene Diversity and Genotypic Antiretroviral Drug Resistance Mutations in Malabo, Equatorial Guinea. In this study, HIV strains circulating among military personnel were characterized, in Malabo, the capital city of Equatorial Guinea. Blood samples were collected in EDTA tubes using standard methods from informed consenting volunteers from the military services in Malabo, the capit…	The paper specifies that the samples were collected from military personnel in Malabo, the capital city of Equatorial Guinea.	Equatorial Guinea
20718620	7	From what years were the sequenced samples obtained?	Here we report the genetic diversity of HIV-1 in individuals identified as HIV positive on the basis of voluntary screening during an HIV prevention and education program among the military services in Malabo, the capital city, from Equatorial Guinea, in March 2008.	The genetic screening happened in March 2008.	2008
20718620	8	Were samples cloned prior to sequencing?	"he amplified fragments for both HIV-1 and -2 samples were purified using the Geneclean Turbo Kit (Q-Biogen, MPbiomedicals, France) and directly sequenced using BigDye Terminator version 3.1 (Applied Biosystems, Courtaboeuf, France) according to the manufacturer's instructions.	The paper mentioned direct sequencing of the amplified fragments, which means no cloning of samples prior to sequencing.	No
20718620	9	Which HIV genes were reported to have been sequenced?	"RNA was extracted from plasma using the QIAamp Viral RNA extraction kit (Qiagen SA, Courtabeauf, France) followed by RT-PCR to amplify a 1865-base pairs (bp) fragment of the *pol* gene using a previously described protocol for HIV-1 genotypic drug resistance testing. For the HIV-2-infected sample a 344-bp fragment in *pol* integrase was amplified with previously described universal HIV/SIV prime…	The paper mentions the sequencing of the *pol* gene for HIV-1 genotypic drug resistance, and a fragment in the integrase region for the HIV-2 sample.	Pol, IN
20718620	10	What method was used for sequencing?	The amplified fragments for both HIV-1 and -2 samples were purified using the Geneclean Turbo Kit (Q-Biogen, MPbiomedicals, France) and directly sequenced using BigDye Terminator version 3.1 (Applied Biosystems, Courtaboeuf, France) according to the manufacturer's instructions. Electrophoresis and data collection were done on an Applied Biosystems 3130XL Genetic Analyzer.	The paper describes the use of BigDye Terminator version 3.1, Electrophoresis, and an Applied Biosystems 3130XL Genetic Analyzer, which are associated with Sanger sequencing.	Sanger sequencing
20718620	11	What type of samples were sequenced?	"Blood samples were collected in EDTA tubes using standard methods from informed consenting volunteers from the military services in Malabo, the capital city, and surroundings. HIV screening was done on plasma samples by an approved national algorithm including two rapid tests, Determine HIV1/2 (Abbott, Tokyo, Japan) and Immunocomb HIV 1 + 2 Bispot (PBS Orgenics, Yavne, Israel) followed by confir…	The paper specifies that plasma samples were used for HIV screening and subsequent sequencing.	Plasma
20718620	12	Were any sequences obtained from individuals with virological failure on a treatment regimen?	We also analyzed the amino acid sequences for the presence of drug resistance mutations according to the last update of the WHO list for the surveillance of drug resistance mutations in antiretroviral-naive patients (SDRM version 2009, http://hivdb.stanford.edu/pages/WHOResistanceList.html). We have also demonstrated that rare resistance mutations to the protease inhibitors (PIs) and reverse tran…	The paper mentions that population was antiretroviral-naive, and they were studing surveillance drug resistant mutations (SDRM) which are mutations before ARV drug treatment. These information indicates that some individuals had not previously received ARV drugs. But the word "also" means some of the individuals were treatment-experienced, but the history is not reported.	Not reported
20718620	13	Were the patients in the study in a clinical trial?	Here we report the genetic diversity of HIV-1 in individuals identified as HIV positive on the basis of voluntary screening during an HIV prevention and education program among the military services in Malabo, the capital city, from Equatorial Guinea, in March 2008.	The paper describes the study as part of an HIV prevention and education program among military personnel, not a clinical trial.	No
20718620	14	Does the paper report HIV sequences from individuals who had previously received ARV drugs?	We also analyzed the amino acid sequences for the presence of drug resistance mutations according to the last update of the WHO list for the surveillance of drug resistance mutations in antiretroviral-naive patients (SDRM version 2009, http://hivdb.stanford.edu/pages/WHOResistanceList.html). We have also demonstrated that rare resistance mutations to the protease inhibitors (PIs) and reverse tran…	The paper mentions that population was antiretroviral-naive, and they were studing surveillance drug resistant mutations (SDRM) which are mutations before ARV drug treatment. These information indicates that some individuals had not previously received ARV drugs. But the word "also" means some of the individuals were treatment-experienced, but the history is not reported.	Not reported
20718620	15	Which drug classes were received by individuals in the study before sample sequencing?	We also analyzed the amino acid sequences for the presence of drug resistance mutations according to the last update of the WHO list for the surveillance of drug resistance mutations in antiretroviral-naive patients (SDRM version 2009, http://hivdb.stanford.edu/pages/WHOResistanceList.html). We have also demonstrated that rare resistance mutations to the protease inhibitors (PIs) and reverse tran…	The paper reported that the some samples were "also" from antiretroviral-naïve populations were also study, which means some samples were from antiretroviral-experienced individuals, the treatment history is not reported.	Not reported
20718620	16	Which drugs were received by individuals in the study before sample sequencing?	We also analyzed the amino acid sequences for the presence of drug resistance mutations according to the last update of the WHO list for the surveillance of drug resistance mutations in antiretroviral-naive patients (SDRM version 2009, http://hivdb.stanford.edu/pages/WHOResistanceList.html). We have also demonstrated that rare resistance mutations to the protease inhibitors (PIs) and reverse tran…	The paper reported that the some samples were "also" from antiretroviral-naïve populations were also study, which means some samples were from antiretroviral-experienced individuals, the treatment history is not reported.	Not reported
20810731	1	Does the paper report HIV sequences from patient samples?	"We examined this question by generating recombinant viruses expressing plasma HIV-1 RNA-derived Gag-Protease sequences from 66 acute/early and 803 chronic untreated subtype B-infected individuals in an NL4-3 background and measuring their RCs using a green fluorescent protein (GFP) reporter CD4 T-cell assay. The acute/early cohort was comprised of 66 antiretroviral-naïve individuals.	The paper discusses the generation of recombinant viruses expressing plasma HIV-1 RNA-derived Gag-Protease sequences from patient samples. Specifically, it mentions that sequences were obtained from 66 acute/early and 803 chronic untreated subtype B-infected individuals.	Yes
20810731	2	Does the paper report in vitro drug susceptibility data?	hile this has been demonstrated for individual cases, a systematic investigation of the consequence of HLA class I-mediated selection on HIV-1 in vitro replication capacity (RC) has not been undertaken. We examined this question by generating recombinant viruses expressing plasma HIV-1 RNA-derived Gag-Protease sequences from 66 acute/early and 803 chronic untreated subtype B-infected individuals …	The paper focuses on the replication capacity (RC) of recombinant viruses expressing patient-derived Gag-Protease sequences and does not mention any in vitro drug susceptibility testing.	No
20810731	3	Were sequences from the paper made publicly available?	"Data for acute/early viral sequences have been deposited in the GenBank database under accession numbers GU390464 to GU390529."	The paper explicitly states that the data for acute/early viral sequences have been deposited in the GenBank database under accession numbers GU390464 to GU390529.	Yes
20810731	4	What were the GenBank accession numbers for sequenced HIV isolates?	"Data for acute/early viral sequences have been deposited in the GenBank database under accession numbers GU390464 to GU390529."	The paper explicitly states that the data for acute/early viral sequences have been deposited in the GenBank database under accession numbers GU390464 to GU390529.	GU390464 to GU390529
20810731	5	How many individuals had samples obtained for HIV sequencing?	"We examined this question by generating recombinant viruses expressing plasma HIV-1 RNA-derived Gag-Protease sequences from 66 acute/early and 803 chronic untreated subtype B-infected individuals in an NL4-3 background and measuring their RCs using a green fluorescent protein (GFP) reporter CD4 T-cell assay."	The paper mentions that samples were obtained from 66 acute/early-infected individuals and 803 chronic untreated individuals, totaling 869 individuals.	869
20810731	6	From which countries were the sequenced samples obtained?	The acute/early cohort was comprised of 66 antiretroviral-naïve individuals (median time postinfection of 61 days from Acute Infection and Early Disease Research Program (AIEDRP) network sites in the United States and Australia as well as a private medical clinic in Germany ( 11 )"	The paper mentions that the acute/early cohort samples were obtained from the United States, Australia, and a private medical clinic in Germany.	United States, Australia, Germany
20810731	7	From what years were the sequenced samples obtained?	No evidence	The paper does not provide specific years for when the sequenced samples were obtained.	Not reported
20810731	8	Were samples cloned prior to sequencing?	No evidence	The paper does not mention that samples were cloned prior to sequencing.	No
20810731	9	Which HIV genes were reported to have been sequenced?	"We examined this question by generating recombinant viruses expressing plasma HIV-1 RNA-derived Gag-Protease sequences from 66 acute/early and 803 chronic untreated subtype B-infected individuals in an NL4-3 background and measuring their RCs using a green fluorescent protein (GFP) reporter CD4 T-cell assay. Recombinant viruses were generated on an NL4-3 background as described previously."	The paper focuses on the Gag and Protease regions of HIV-1, as indicated by the generation of recombinant viruses expressing Gag-Protease sequences and the analysis of these regions.	Gag, PR
20810731	10	What method was used for sequencing?	Bulk HIV-1 RNA was extracted from viral culture supernatants by using the QIAamp viral RNA kit (Qiagen), amplified by nested RT-PCR using sequence-specific primers, sequenced bidirectionally on an ABI 3730xl sequencer (Applied Biosystems), and analyzed by using Sequencher 4.9 software (Gene Codes).	The paper mentions that sequences were obtained using an ABI 3730xl sequencer, which is a platform used for Sanger sequencing.	Sanger sequencing
20810731	11	What type of samples were sequenced?	Bulk plasma HIV-1 RNA sequences were previously collected for all individuals in the acute/early ( 11 ) and chronic ( 14 ) infection cohorts. We examined this question by generating recombinant viruses expressing plasma HIV-1 RNA-derived Gag-Protease sequences from 66 acute/early and 803 chronic untreated subtype B-infected individuals in an NL4-3 background and measuring their RCs using a green …	The paper mentions that plasma HIV-1 RNA sequences were collected for all individuals in the acute/early and chronic infection cohorts.	Plasma
20810731	12	Were any sequences obtained from individuals with virological failure on a treatment regimen?	The acute/early cohort was comprised of 66 antiretroviral-naïve individuals (median time postinfection of 61 days. The chronic cohort was comprised of 803 individuals. Of these individuals, 762 (94.9%) represented a baseline (antiretroviral-naïve) cross-section of the British Columbia HOMER cohort (12-14). The remaining 41 (5.1%) individuals represented chronically infected individuals recruited …	The paper specifies that the study involved acute/early infected individuals and chronic untreated individuals, both are treatment-naïve individuals, and without virological filure.	No
20810731	13	Were the patients in the study in a clinical trial?	The acute/early cohort was comprised of 66 antiretroviral-naïve individuals (median time postinfection of 61 days) from Acute Infection and Early Disease Research Program (AIEDRP) network sites in the United States and Australia as well as a private medical clinic in Germany. The chronic cohort was comprised of 803 individuals. Of these individuals, 762 (94.9%) represented a baseline (antiretrovi…	The paper does not mention that the patients were in a clinical trial. It describes the cohorts as being from specific research programs and medical clinics.	No
20810731	14	Does the paper report HIV sequences from individuals who had previously received ARV drugs?	We examined this question by generating recombinant viruses expressing plasma HIV-1 RNA-derived Gag-Protease sequences from 66 acute/early and 803 chronic untreated subtype B-infected individuals in an NL4-3 background and measuring their RCs using a green fluorescent protein (GFP) reporter CD4 T-cell assay.	Although the paper is about in vitro selection, the samples were clinical samples and were collected from acute/early and chronic untreated individuals, which all indicates the individuals were treatment naïve, had not received ARV drugs.	No
20810731	15	Which drug classes were received by individuals in the study before sample sequencing?	We examined this question by generating recombinant viruses expressing plasma HIV-1 RNA-derived Gag-Protease sequences from 66 acute/early and 803 chronic untreated subtype B-infected individuals in an NL4-3 background and measuring their RCs using a green fluorescent protein (GFP) reporter CD4 T-cell assay.	The paper specifies that the study involved acute/early infected antiretroviral-naïve individuals, and untreated chronical infected individuals, which means they were treatment-naïve.	None
20810731	16	Which drugs were received by individuals in the study before sample sequencing?	We examined this question by generating recombinant viruses expressing plasma HIV-1 RNA-derived Gag-Protease sequences from 66 acute/early and 803 chronic untreated subtype B-infected individuals in an NL4-3 background and measuring their RCs using a green fluorescent protein (GFP) reporter CD4 T-cell assay.	The paper specifies that the study involved acute/early infected antiretroviral-naïve individuals, and untreated chronical infected individuals, which means they were treatment-naïve.	None
20812894	1	Does the paper report HIV sequences from patient samples?	The blood samples from HIV-1-seropositive individuals were collected at Douala (02CMLT72), Lomie (02CM1917LE), and Manyamen (02CM3097MN) in Cameroon in 2001 and 2002, respectively	The paper mentions that blood samples from HIV-1-seropositive individuals were collected in various locations in Cameroon.	Yes
20812894	2	Does the paper report in vitro drug susceptibility data?	In this study, we describe the characterization of five CRF22_01A1 strains, 02CMLT72, 01CM1867LE, 01CM001BBY, 02CM3097MN, and 02CM1917LE, identified in Cameroon without apparent epidemiological links.	The paper focuses on the genetic characterization and phylogenetic analysis of HIV-1 strains but does not mention any in vitro drug susceptibility testing.	No
20812894	3	Were sequences from the paper made publicly available?	The nucleotide sequences of 02CMLT72, 02CM3097MN, and 02CM1917LE strains used in this study were submitted to GenBank with the following accession numbers; EU743963, GQ229529, and GQ229530, respectively."	The paper reports three new GenBank sequences (EU743963, GQ229529, and GQ229530) in the Sequence Data section	Yes
20812894	4	What were the GenBank accession numbers for sequenced HIV isolates?	The nucleotide sequences of 02CMLT72, 02CM3097MN, and 02CM1917LE strains used in this study were submitted to GenBank with the following accession numbers; EU743963, GQ229529, and GQ229530, respectively."	The paper reports three new GenBank sequences (EU743963, GQ229529, and GQ229530) in the Sequence Data section	EU743963, GQ229529, and GQ229530
20812894	5	How many individuals had samples obtained for HIV sequencing?	In our previous study, 135 HIV-1-positive plasma samples were collected from blood centers in Douala and Yaoundé, in Cameroon.	The paper mentions that 135 HIV-1-positive plasma samples were collected for sequencing.	135
20812894	6	From which countries were the sequenced samples obtained?	"The blood samples from HIV-1-seropositive individuals were collected at Douala (02CMLT72), Lomie (02CM1917LE), and Manyamen (02CM3097MN) in Cameroon in 2001 and 2002, respectively	The paper clearly states that the blood samples were collected from various locations within Cameroon.	Cameroon
20812894	7	From what years were the sequenced samples obtained?	The blood samples from HIV-1-seropositive individuals were collected at Douala (02CMLT72), Lomie (02CM1917LE), and Manyamen (02CM3097MN) in Cameroon in 2001 and 2002, respectively.	The paper mentions that the blood samples were collected in the years 2001 and 2002.	2001-2002
20812894	8	Were samples cloned prior to sequencing?	Purified PCR products were sequenced directly by primer walking using the ABI Prism BigDye Terminator Cycle Sequencing kit and ABI PRISM 310 Genetic Analyzer (Applied Biosystems, Foster City, CA).	The paper does not mention any cloning of samples prior to sequencing.	No
20812894	9	Which HIV genes were reported to have been sequenced?	Forty-eight percent of the genome is classified as CRF01_AE, spanning the entire region of the *gag* gene, part of the *pol* gene, and accessory genes as well as the beginning and the end of the *env* gene and *nef* gene; Fifty-two percent of the genome is subsubtype A1 including regions mostly in the *pol, vif,* and *env* genes.	The paper describes the sequencing of various regions of the HIV-1 genome, including the gag, pol, vif, env, and nef genes.	Gag, Pol, Vif, Env, Nef
20812894	10	What method was used for sequencing?	Purified PCR products were sequenced directly by primer walking using the ABI Prism BigDye Terminator Cycle Sequencing kit and ABI PRISM 310 Genetic Analyzer (Applied Biosystems, Foster City, CA).	The paper describes the use of the ABI Prism BigDye Terminator Cycle Sequencing kit and ABI PRISM 310 Genetic Analyzer, which are associated with Sanger sequencing.	Sanger sequencing
20812894	11	What type of samples were sequenced?	Viral RNA was extracted from plasma samples using the QIAamp Viral RNA Mini kit (Qiagen Inc., Valencia, CA).	The paper specifies that viral RNA was extracted from plasma samples for sequencing.	Plasma
20812894	12	Were any sequences obtained from individuals with virological failure on a treatment regimen?	No evidence	The paper does not mention virological failure or treatment regimens of the individuals from whom the samples were obtained.	Not reported
20812894	13	Were the patients in the study in a clinical trial?	No evidence	The paper does not mention that the patients were part of a clinical trial.	No
20812894	14	Does the paper report HIV sequences from individuals who had previously received ARV drugs?	Identification and Genetic Characterization of a Novel CRF22_01A1 Recombinant Form of HIV Type 1 in Cameroon. The blood samples from HIV-1-seropositive individuals were collected at Douala (02CMLT72), Lomie (02CM1917LE), and Manyamen (02CM3097MN) in Cameroon in 2001 and 2002, respectively (Fig. 1). These patients were not epidemiologically linked.	The paper focuses on HIV recombinant forms, it mentioned blood samples from HIV-1 seropositive individuals, but didn't mention the treatment history.	Not reported
20812894	15	Which drug classes were received by individuals in the study before sample sequencing?	Identification and Genetic Characterization of a Novel CRF22_01A1 Recombinant Form of HIV Type 1 in Cameroon. The blood samples from HIV-1-seropositive individuals were collected at Douala (02CMLT72), Lomie (02CM1917LE), and Manyamen (02CM3097MN) in Cameroon in 2001 and 2002, respectively (Fig. 1). These patients were not epidemiologically linked.	The paper does not provide information on the specific drugs received by individuals before sample sequencing.	Not reported
20812894	16	Which drugs were received by individuals in the study before sample sequencing?	Identification and Genetic Characterization of a Novel CRF22_01A1 Recombinant Form of HIV Type 1 in Cameroon. The blood samples from HIV-1-seropositive individuals were collected at Douala (02CMLT72), Lomie (02CM1917LE), and Manyamen (02CM3097MN) in Cameroon in 2001 and 2002, respectively (Fig. 1). These patients were not epidemiologically linked.	The paper does not provide information on the specific drugs received by individuals before sample sequencing.	Not reported
21114823	1	Does the paper report HIV sequences from patient samples?	"The integrase coding sequence from 45 HIV-2-infected, INI-naïve, patients was sequenced and aligned against the ROD (group A) or EHO (group B) reference strains and polymorphic or conserved positions were analyzed. Fifty-two IN sequences derived from 45 patients were analyzed: 46 sequences were from patients infected with HIV-2 group A strains (32 sequences were from treatment-naïve patients and…	The paper describes the sequencing of the integrase coding sequence from 45 HIV-2-infected patients. It mentions that 52 integrase sequences derived from 45 patients were analyzed, indicating that the sequences were obtained from patient samples.	Yes
21114823	2	Does the paper report in vitro drug susceptibility data?	"To select for raltegravir (RAL)-resistant variants in vitro, the ROD strain was cultured under increasing sub-optimal RAL concentrations for successive rounds. The phenotype of the selected variants was assessed using an MTT assay. The Q91R and I175M mutations emerged simultaneously and conferred phenotypic resistance (13-fold increase in IC ~50~ ).	The paper reports in vitro drug susceptibility data by describing the selection of raltegravir-resistant variants in vitro and assessing their phenotype susceptibility.	Yes
21114823	3	Were sequences from the paper made publicly available?	"The complete IN coding sequences of the 53 sequenced HIV-2 samples are available in Genbank under the accession numbers GU966535 through GU966581 group A and HM771234 through HM771239 for group B. the ROD-Q91R+I175M double mutant Genbank accession number is HM771240. Forty-seven PR-RT sequences are available under Genbank accession numbers between EF611309 to EF611333, and from HQ451906 to HQ451…	The paper provides specific GenBank accession numbers for the sequenced HIV-2 samples. It lists the accession numbers for the integrase coding sequences, the ROD-Q91R+I175M double mutant, and the PR-RT sequences.	Yes
21114823	4	What were the GenBank accession numbers for sequenced HIV isolates?	"The complete IN coding sequences of the 53 sequenced HIV-2 samples are available in Genbank under the accession numbers GU966535 through GU966581 group A and HM771234 through HM771239 for group B. the ROD-Q91R+I175M double mutant Genbank accession number is HM771240. Forty-seven PR-RT sequences are available under Genbank accession numbers between EF611309 to EF611333, and from HQ451906 to HQ451…	The paper provides specific GenBank accession numbers for the sequenced HIV-2 samples. It lists the accession numbers for the integrase coding sequences, the ROD-Q91R+I175M double mutant, and the PR-RT sequences.	GU966535 through GU966581, HM771234 through HM771239, HM771240, EF611309 to EF611333, HQ451906 to HQ451937
21114823	5	How many individuals had samples obtained for HIV sequencing?	"Fifty-two IN sequences derived from 45 patients were analyzed: 46 sequences were from patients infected with HIV-2 group A strains (32 sequences were from treatment-naïve patients and 14 from treatment-experienced patients), and 6 from patients infected with group B strains (5 treatment-naïve patients and 1 treatment-experienced patient)."	The paper states that 52 integrase sequences derived from 45 patients were analyzed, indicating that samples were obtained from 45 individuals.	45
21114823	6	From which countries were the sequenced samples obtained?	"Fourty-six HIV-2-infected, INI-naïve patients from the Belgian, Luxembourg and Malian cohorts were included in this study."	The paper specifies that the 46 HIV-2-infected, INI-naïve patients included in the study were from the Belgian, Luxembourg, and Malian cohorts.	Belgium, Luxembourg, Mali
21114823	7	From what years were the sequenced samples obtained?	The full pol gene from 53 samples was sequenced from frozen plasma collected between 1997 and 2008.	Paper mentioned " plasma collected between 1997 and 2008", hence 1997-2008	1997-2008
21114823	8	Were samples cloned prior to sequencing?	Sequencing reactions were performed using the Big Dye Terminator cycle-sequencing kit 3.1 on an ABI 3130 xl sequencer following the manufacturer recommendations (Applied Biosystems-Life Technologies, Carlsbad, California).	The paper does not mention any cloning of samples prior to sequencing.	No
21114823	9	Which HIV genes were reported to have been sequenced?	"The integrase coding sequence from 45 HIV-2-infected, INI-naïve, patients was sequenced and aligned against the ROD (group A) or EHO (group B) reference strains and polymorphic or conserved positions were analyzed. PR and RT were sequenced as well and PR-RT sequences are available for 48 of the 51 samples (36 PR-RT sequences for treatment-naïve samples and 14 PR-RT for the treatment-experienced …	The paper mentions the sequencing of the integrase coding sequence from 45 HIV-2-infected patients. Additionally, it states that PR and RT were sequenced as well, and PR-RT sequences are available for 48 of the 51 samples.	PR, RT, IN
21114823	10	What method was used for sequencing?	Sequencing reactions were performed using the Big Dye Terminator cycle-sequencing kit 3.1 on an ABI 3130 xl sequencer following the manufacturer recommendations (Applied Biosystems-Life Technologies, Carlsbad, California).	The paper describes the sequencing reactions performed using the Big Dye Terminator cycle-sequencing kit 3.1 on an ABI 3130 xl sequencer, which is a method associated with Sanger sequencing.	Sanger sequencing
21114823	11	What type of samples were sequenced?	The full pol gene from 53 samples was sequenced from frozen plasma collected between 1997 and 2008.	The paper specifies that the full pol gene from 53 samples was sequenced from frozen plasma collected between 1997 and 2008.	Plasma
21114823	12	Were any sequences obtained from individuals with virological failure on a treatment regimen?	Fifty-two IN sequences derived from 45 patients were analyzed: 46 sequences were from patients infected with HIV-2 group A strains (32 sequences were from treatment-naïve patients and 14 from treatment-experienced patients), and 6 from patients infected with group B strains (5 treatment-naïve patients and 1 treatment-experienced patient). Other resistance-associated mutations present in that samp…	The paper mentions that sequences were obtained from treatment-experienced patients, and these sequences contain common RT and PR drug resistance mutations, which indicates they were experienced treatment failure.	Yes
21114823	13	Were the patients in the study in a clinical trial?	Fourty-six HIV-2-infected, INI-naïve patients from the Belgian, Luxembourg and Malian cohorts were included in this study. For 7 patients from Belgium and Luxembourg, longitudinal samples were available, and the earliest treatment-naïve (baseline) and latest treatment-experienced samples were selected for sequencing (i.e. 53 samples were sequenced).	The paper does not mention that the patients were in a clinical trial.	No
21114823	14	Does the paper report HIV sequences from individuals who had previously received ARV drugs?	Fifty-two IN sequences derived from 45 patients were analyzed: 46 sequences were from patients infected with HIV-2 group A strains (32 sequences were from treatment-naïve patients and 14 from treatment-experienced patients), and 6 from patients infected with group B strains (5 treatment-naïve patients and 1 treatment-experienced patient). All the ARV-treated patients were INI-naïve. Thirty-eight …	The paper mentions that sequences were obtained from 32 sequences were from treatment-naïve patients and 14 from treatment-experienced patients, so 14 patients had received ARV drugs. It also mentions all ARV-treated patients were INI-naïve. This means some individuals had received ARV drugs, but not integrase inhibitor.	Yes
21114823	15	Which drug classes were received by individuals in the study before sample sequencing?	Fifty-two IN sequences derived from 45 patients were analyzed: 46 sequences were from patients infected with HIV-2 group A strains (32 sequences were from treatment-naïve patients and 14 from treatment-experienced patients), and 6 from patients infected with group B strains (5 treatment-naïve patients and 1 treatment-experienced patient). All the ARV-treated patients were INI-naïve. Thirty-eight …	The paper mentions that patients had been exposed to 2-4 NRTIs and some were treated with 2-4 NRTIs + 1 or 2 PIs.	NRTI, PI
21114823	16	Which drugs were received by individuals in the study before sample sequencing?	Fifty-two IN sequences derived from 45 patients were analyzed: 46 sequences were from patients infected with HIV-2 group A strains (32 sequences were from treatment-naïve patients and 14 from treatment-experienced patients), and 6 from patients infected with group B strains (5 treatment-naïve patients and 1 treatment-experienced patient). All the ARV-treated patients were INI-naïve. Thirty-eight …	The paper mentioned that 32 sequences were from treatment-naïve patients and 14 from treatment-experienced patients. And All the ARV-treated patients were INI-naïve. The drugs used by individuals were not reported.	Not reported
21189351	1	Does the paper report HIV sequences from patient samples?	"We studied seven heavily pretreated HIV-2-infected patients exhibiting a virological failure while receiving a salvage raltegravir-containing regimen. The complete IN gene was retrospectively amplified by population-based sequencing from plasma samples collected at baseline and at time of virological failure of RAL-containing treatment, as previously described ( 12 ). HIV-2 protease and reverse …	The paper mentions that the study involved seven heavily pretreated HIV-2-infected patients and describes the sequencing of HIV-2 integrase, protease, and reverse transcriptase genes from plasma samples collected at baseline and at the time of virological failure.	Yes
21189351	2	Does the paper report in vitro drug susceptibility data?	We studied seven heavily pretreated HIV-2-infected patients exhibiting a virological failure while receiving a salvage raltegravir-containing regimen. At the time of virological failure, different resistance genetic pathways were observed: T97A-Y143C, Q148K, Q148R, G140S-Q148R, E92Q-Y143R-N155H, and T97A-N155H. Thus, despite a 40% difference in integrase genes between HIV-1 and HIV-2, the genetic…	The paper focuses on the genetic mutational pathways associated with the development of resistance to raltegravir in HIV-2-infected patients and does not mention any in vitro drug susceptibility assays or data.	No
21189351	3	Were sequences from the paper made publicly available?	"Integrase sequences were submitted to GenBank and given the following accession numbers: HQ694834 to HQ694845."	The paper explicitly states that the integrase sequences were submitted to GenBank and provides the accession numbers HQ694834 to HQ694845.	Yes
21189351	4	What were the GenBank accession numbers for sequenced HIV isolates?	"Integrase sequences were submitted to GenBank and given the following accession numbers: HQ694834 to HQ694845."	The paper explicitly states that the integrase sequences were submitted to GenBank and provides the accession numbers HQ694834 to HQ694845.	HQ694834 to HQ694845
21189351	5	How many individuals had samples obtained for HIV sequencing?	We studied seven heavily pretreated HIV-2-infected patients exhibiting a virological failure while receiving a salvage raltegravir-containing regimen.	The paper states that seven heavily pretreated HIV-2-infected patients were studied.	7
21189351	6	From which countries were the sequenced samples obtained?	"All of the patients were identified from the French HIV-2 Agence Nationale de Recherches sur le SIDA et les hépatites virales (ANRS) cohort CO5."	The paper states that all patients were identified from the French HIV-2 Agence Nationale de Recherches sur le SIDA et les hépatites virales (ANRS) cohort CO5, indicating that the samples were obtained from France.	France
21189351	7	From what years were the sequenced samples obtained?	No evidence	The paper does not provide specific years during which the samples were obtained.	Not reported
21189351	8	Were samples cloned prior to sequencing?	The complete IN gene was retrospectively amplified by population-based sequencing from plasma samples collected at baseline and at time of virological failure of RAL-containing treatment, as previously described ( 12 ).	The paper does not mention any cloning of samples prior to sequencing, indicating that the samples were directly sequenced.	No
21189351	9	Which HIV genes were reported to have been sequenced?	"The complete IN gene was retrospectively amplified by population-based sequencing from plasma samples collected at baseline and at time of virological failure of RAL-containing treatment, as previously described ( 12 ). HIV-2 protease and reverse transcriptase sequencing was performed using previously described procedures ( 4 , 10 )."	The paper mentions the sequencing of the complete integrase gene, as well as the protease and reverse transcriptase genes from plasma samples.	PR, RT, IN
21189351	10	What method was used for sequencing?	The complete IN gene was retrospectively amplified by population-based sequencing from plasma samples collected at baseline and at time of virological failure of RAL-containing treatment, as previously described ( 12 ).	The paper mentions that the complete integrase gene was amplified by population-based sequencing, which typically refers to Sanger sequencing.	Sanger sequencing
21189351	11	What type of samples were sequenced?	The complete IN gene was retrospectively amplified by population-based sequencing from plasma samples collected at baseline and at time of virological failure of RAL-containing treatment, as previously described ( 12 ).	The paper specifies that plasma samples were collected and used for sequencing.	Plasma
21189351	12	Were any sequences obtained from individuals with virological failure on a treatment regimen?	We studied seven heavily pretreated HIV-2-infected patients exhibiting a virological failure while receiving a salvage raltegravir-containing regimen. The complete IN gene was retrospectively amplified by population-based sequencing from plasma samples collected at baseline and at time of virological failure of RAL-containing treatment, as previously described ( 12 ).	The paper reports that the study involved seven heavily pretreated HIV-2-infected patients exhibiting virological failure while receiving a salvage raltegravir-containing regimen.	Yes
21189351	13	Were the patients in the study in a clinical trial?	"All of the patients were identified from the French HIV-2 Agence Nationale de Recherches sur le SIDA et les hépatites virales (ANRS) cohort CO5."	The paper does not mention that the patients were in a clinical trial.	Not reported
21189351	14	Does the paper report HIV sequences from individuals who had previously received ARV drugs?	We studied seven heavily pretreated HIV-2-infected patients exhibiting a virological failure while receiving a salvage raltegravir-containing regimen. The complete IN gene was retrospectively amplified by population-based sequencing from plasma samples collected at baseline and at time of virological failure of RAL-containing treatment, as previously described ( 12 ).	The paper mentions that the study involved seven heavily pretreated HIV-2-infected patients, with virological failure, and receiving a salvage regimen. All information means the individual had received ARV drugs.	Yes
21189351	15	Which drug classes were received by individuals in the study before sample sequencing?	All patients received darunavir boosted with ritonavir. The nucleoside reverse transcriptase inhibitors (NRTI) lamivudine (or emtricitabine), abacavir, tenofovir, and zidovudine were received by six, three, four, and one patient, respectively. Seven heavily pretreated HIV-2-infected patients receiving a salvage RAL-containing regimen exhibited incomplete viral suppression or virological failure, …	All patients received darunavir boosted with ritonavir. Darunavir is a PI, NRTIs are received, and the study also mentioned "heavily pretreated patients" received RAL-containing regimen, which is an INSTI. So NRTI, PI and INSTI were received.	NRTI, PI, INSTI
21189351	16	Which drugs were received by individuals in the study before sample sequencing?	All patients received darunavir boosted with ritonavir. The nucleoside reverse transcriptase inhibitors (NRTI) lamivudine (or emtricitabine), abacavir, tenofovir, and zidovudine were received by six, three, four, and one patient, respectively. Seven heavily pretreated HIV-2-infected patients receiving a salvage RAL-containing regimen exhibited incomplete viral suppression or virological failure, …	The paper provides a detailed list of the drugs received by the patients, including lamivudine, emtricitabine, abacavir, tenofovir, zidovudine, darunavir, and raltegravir.	Lamivudine (3TC), Emtricitabine (FTC), Abacavir (ABC), Tenofovir (TDF), Zidovudine (AZT), Darunavir (DRV), Raltegravir (RAL)
21358627	1	Does the paper report HIV sequences from patient samples?	We analyzed HIV-1 genome sequences from 68 newly-infected volunteers in the Step HIV-1 vaccine trial. Single template-derived and directly sequenced HIV-1 amplicons were obtained from 40 vaccine and 28 placebo recipients. Near full-length genome (nflg) sequences (~9.1 Kb) were obtained from 66 volunteers, and half-genomes from two individuals.	The paper reports HIV-1 genome sequences from 68 newly-infected volunteers in the Step HIV-1 vaccine trial. This indicates that the sequences were obtained from patient samples.	Yes
21358627	2	Does the paper report in vitro drug susceptibility data?	Genetic impact of vaccination on breakthrough HIV-1 sequences from the Step trial. We analyzed HIV-1 genome sequences from 68 newly-infected volunteers in the Step HIV-1 vaccine trial. To determine whether the vaccine exerted selective T-cell pressure on breakthrough viruses, we identified potential T-cell epitopes in the founder sequences and compared them to epitopes in the vaccine. We found gr…	The paper focuses on the genetic impact of vaccination on breakthrough HIV-1 sequences and does not mention any in vitro drug susceptibility data.	No
21358627	3	Were sequences from the paper made publicly available?	GenBank accession numbers: JF320002-JF320643.	The GenBank accession numbers for the sequenced HIV isolates are explicitly mentioned in the Methods section of The paper.	Yes
21358627	4	What were the GenBank accession numbers for sequenced HIV isolates?	GenBank accession numbers: JF320002-JF320643.	The GenBank accession numbers for the sequenced HIV isolates are explicitly mentioned in the Methods section of The paper.	JF320002-JF320643
21358627	5	How many individuals had samples obtained for HIV sequencing?	We analyzed HIV-1 genome sequences from 68 newly infected volunteers in the STEP HIV-1 vaccine trial.	The paper mentioned they "analyzed HIV-1 genome sequences from 68 newly infected volunteers"	68
21358627	6	From which countries were the sequenced samples obtained?	Phylogenetic analyses were also performed using all volunteer-derived env nucleotide sequences (n = 459) along with 243 circulating sequences isolated since 2000 in Canada, Peru and the US.	The paper mentions that phylogenetic analyses were performed using volunteer-derived env nucleotide sequences along with circulating sequences isolated since 2000 in Canada, Peru, and the US.	Canada, Peru, United States
21358627	7	From what years were the sequenced samples obtained?	Phylogenetic analyses were also performed using all volunteer-derived env nucleotide sequences (n = 459) along with 243 circulating sequences isolated since 2000 in Canada, Peru and the US.	The paper mentions 243 circulating sequences were isolated since 2000 in Canada, Peru and the US.	2000
21358627	8	Were samples cloned prior to sequencing?	PCR products corresponded to single amplifiable viral genomes derived from plasma collected at HIV-1 diagnosis. Single template-derived and directly sequenced HIV-1 amplicons were obtained from 40 vaccine and 28 placebo recipients, echoing the higher rate of HIV-1 acquisition among vaccinees (Table 1). Near full-length genome (nflg) sequences (~9.1 Kb) were obtained from 66 volunteers, and half-g…	The paper does not mention any cloning of samples prior to sequencing.	No
21358627	9	Which HIV genes were reported to have been sequenced?	Near full-length genome (nflg) sequences (~9.1 Kb) were obtained from 66 volunteers, and half-genomes from two individuals.	The paper reports the sequencing of near full-length genome (nflg) sequences, which implies that multiple genes were sequenced.	Near full length genome
21358627	10	What method was used for sequencing?	PCR products corresponded to single amplifiable viral genomes derived from plasma collected at HIV-1 diagnosis. Single template-derived and directly sequenced HIV-1 amplicons were obtained from 40 vaccine and 28 placebo recipients, echoing the higher rate of HIV-1 acquisition among vaccinees (Table 1). Near full-length genome (nflg) sequences (~9.1 Kb) were obtained from 66 volunteers, and half-g…	The paper mentions samples were directly sequenced, which indicates the study was using sanger sequencing method.	Sanger sequencing
21358627	11	What type of samples were sequenced?	PCR products corresponded to single amplifiable viral genomes derived from plasma collected at HIV-1 diagnosis.	The paper mentions that the PCR products were derived from plasma collected at HIV-1 diagnosis.	Plasma
21358627	12	Were any sequences obtained from individuals with virological failure on a treatment regimen?	We analyzed HIV-1 genome sequences from 68 newly-infected volunteers in the Step HIV-1 vaccine trial.	The paper mentions the volunteer were newly-infected, indicating they were treatment-naïve.	No
21358627	13	Were the patients in the study in a clinical trial?	We analyzed HIV-1 genome sequences from 68 newly-infected volunteers in the Step HIV-1 vaccine trial.	The paper mentions that the sequences were obtained from volunteers in the Step HIV-1 vaccine trial, which is a clinical trial.	Yes
21358627	14	Does the paper report HIV sequences from individuals who had previously received ARV drugs?	We analyzed HIV-1 genome sequences from 68 newly infected volunteers in the STEP HIV-1 vaccine trial.	The paper mentioned that all 68 volunteers were newly infected, which means they were treatment naïve.	No
21358627	15	Which drug classes were received by individuals in the study before sample sequencing?	We analyzed HIV-1 genome sequences from 68 newly infected volunteers in the STEP HIV-1 vaccine trial.	The paper mentioned that all 68 volunteers were newly infected, which means they were treatment naïve.	None
21358627	16	Which drugs were received by individuals in the study before sample sequencing?	We analyzed HIV-1 genome sequences from 68 newly infected volunteers in the STEP HIV-1 vaccine trial.	The paper mentioned that all 68 volunteers were newly infected, which means they were treatment naïve.	None
21765953	1	Does the paper report HIV sequences from patient samples?	We PCR amplified and analyzed 122 HIV-2 integrase consensus sequences from 39 HIV-2--infected, INI-naive adults in Senegal, West Africa. We analyzed HIV-2 integrase sequences from 39 Senegalese adults whose baseline characteristics are shown in Table 1.	The paper reports HIV-2 sequences from patient samples. This is evident from the methods section where it mentions that 122 HIV-2 integrase consensus sequences were analyzed from 39 HIV-2-infected, INI-naive adults in Senegal, West Africa.	Yes
21765953	2	Does the paper report in vitro drug susceptibility data?	"HIV-2 Integrase Variation in Integrase Inhibitor-Naïve Adults in Senegal, West Africa. Antiretroviral therapy for HIV-2 infection is hampered by intrinsic resistance to many of the drugs used to treat HIV-1. Limited studies suggest that the integrase inhibitors (INIs) raltegravir and elvitegravir have potent activity against HIV-2 in culture and in infected patients. There is a paucity of data o…	The paper does not mention any in vitro drug susceptibility data.	No
21765953	3	Were sequences from the paper made publicly available?	Genbank Accession numbers of the HIV-2 sequences from this study: JF811132-JF811253.	The GenBank accession numbers for the HIV-2 sequences from this study are explicitly mentioned in the methods section.	Yes
21765953	4	What were the GenBank accession numbers for sequenced HIV isolates?	Genbank Accession numbers of the HIV-2 sequences from this study: JF811132-JF811253.	The GenBank accession numbers for the HIV-2 sequences from this study are explicitly mentioned in the methods section.	JF811132-JF811253
21765953	5	How many individuals had samples obtained for HIV sequencing?	We PCR amplified and analyzed 122 HIV-2 integrase consensus sequences from 39 HIV-2--infected, INI-naive adults in Senegal, West Africa; We analyzed HIV-2 integrase sequences from 39 Senegalese adults whose baseline characteristics are shown in Table 1.	The paper states that 39 HIV-2-infected, INI-naive adults were included in the study.	39
21765953	6	From which countries were the sequenced samples obtained?	We PCR amplified and analyzed 122 HIV-2 integrase consensus sequences from 39 HIV-2--infected, INI-naive adults in Senegal, West Africa; Patient samples were collected as part of an NIH-sponsored, ongoing prospective longitudinal cohort study of ART for HIV-2 infection in Senegal, West Africa.	The paper clearly states that the patient samples were collected from Senegal, West Africa.	Senegal
21765953	7	From what years were the sequenced samples obtained?	Patient samples were collected as part of an NIH-sponsored, ongoing prospective longitudinal cohort study of ART for HIV-2 infection in Senegal, West Africa; enrollment began in October 2005.	The paper mentions that enrollment for the study began in October 2005, indicating that the samples were obtained from that year onwards.	2005 onwards
21765953	8	Were samples cloned prior to sequencing?	Bulk PCR products were agarose gel-purified (S.N.A.P. UV-Free Gel Purification Kit, Invitrogen) and sequenced via standard dideoxy-chain termination methods using primers H2AB_INT_seqR, H2AB_INT_seqF, H2AB_INT F2 and H2AB_INT R2. A total of 122 HIV-2 patient-derived consensus ("bulk") sequences were obtained, with longitudinal sequences from 24 (62%) individuals.	The paper does not mention any cloning of samples prior to sequencing. It describes the use of consensus ("bulk") sequences obtained from PCR products.	No
21765953	9	Which HIV genes were reported to have been sequenced?	We PCR amplified and analyzed 122 HIV-2 integrase consensus sequences from 39 HIV-2--infected, INI-naive adults in Senegal, West Africa; HIV-2--specific nested PCR was used to amplify the integrase-encoding region of pol (nucleotides 4738 to 5777, numbered as per HIV-2 ROD, GenBank accession # M15390).	The paper reports sequencing of the integrase gene of HIV-2. This is mentioned in the methods section where it describes the PCR amplification of the integrase-encoding region of the pol gene.	IN
21765953	10	What method was used for sequencing?	Bulk PCR products were agarose gel-purified (S.N.A.P. UV-Free Gel Purification Kit, Invitrogen) and sequenced via standard dideoxy-chain termination methods using primers H2AB_INT_seqR, H2AB_INT_seqF, H2AB_INT F2 and H2AB_INT R2.	The paper describes the use of standard dideoxy-chain termination methods for sequencing, which is synonymous with Sanger sequencing.	Sanger sequencing
21765953	11	What type of samples were sequenced?	Purified PBMC DNA was extracted from each patient sample using the QIAamp DNA Blood Mini Kit (Qiagen Inc., Valencia, CA) and quantified by spectrophometry (Nanodrop, Wilmington, DE).	The paper mentions that DNA was extracted from PBMCs (Peripheral Blood Mononuclear Cells) for sequencing.	PBMC
21765953	12	Were any sequences obtained from individuals with virological failure on a treatment regimen?	All individuals were INI-naïve; 6 were ART-naïve, and 33 patients were receiving NRTI+PI--based regimens at the time of integrase genotyping.	The paper does not mention obtaining sequences from individuals with virological failure. It states that all individuals were INI-naïve, and some were ART-naïve while others were on NRTI+PI-based regimens.	Not reported
21765953	13	Were the patients in the study in a clinical trial?	Patient samples were collected as part of an NIH-sponsored, ongoing prospective longitudinal cohort study of ART for HIV-2 infection in Senegal, West Africa.	The paper describes the study as part of an ongoing prospective longitudinal cohort study, not a clinical trial.	No
21765953	14	Does the paper report HIV sequences from individuals who had previously received ARV drugs?	All individuals were INI-naïve; 6 were ART-naïve, and 33 patients were receiving NRTI+PI--based regimens at the time of integrase genotyping.	The paper mentions that 33 patients were receiving NRTI+PI-based regimens at the time of integrase genotyping.	Yes
21765953	15	Which drug classes were received by individuals in the study before sample sequencing?	All individuals were INI-naïve; 6 were ART-naïve, and 33 patients were receiving NRTI+PI--based regimens at the time of integrase genotyping.	The paper states that 33 patients were receiving NRTI+PI-based regimens at the time of integrase genotyping.	NRTI, PI
21765953	16	Which drugs were received by individuals in the study before sample sequencing?	All individuals were INI-naïve; 6 were ART-naïve, and 33 patients were receiving NRTI+PI--based regimens at the time of integrase genotyping.	The paper mentioned that 6 individuals were ART-naïve, 33 were receiving NRTI+PI, all of them are INSTI naïve. The drugs were not reported.	Not reported
24655349	1	Does the paper report HIV sequences from patient samples?	Viral RNA was determined in 160 baseline plasma samples. One hundred and sixty samples (73 males and 87 females) were amplified and sequenced for HIV-1 subtyping and genotypic drug resistance analysis.	The paper mentions that viral RNA was determined in 160 baseline plasma samples from HIV-1 chronically infected treatment naïve patients. This indicates that HIV sequences were obtained from patient samples.	Yes
24655349	2	Does the paper report in vitro drug susceptibility data?	Viral RNA was determined in 160 baseline plasma samples. The entire PR and the first 335 codons (76%) of the RT regions of the pol gene of the HIV-1 genome (N = 160) were amplified and sequenced using an in-house assay. Genotypic drug resistance was defined as the presence of one or more resistance-related mutations as specified by the consensus mutation of Stanford University HIVDB and the Inter…	The paper focuses on genotypic drug resistance analysis and does not mention any in vitro drug susceptibility testing. The methods and results sections describe sequencing and mutation analysis but do not include any in vitro assays to test drug susceptibility.	No
24655349	3	Were sequences from the paper made publicly available?	Nucleotide sequences are deposited in National Centre for Biotechnology Information (NCBI), USA GenBank (Accession Number: KF026059-KF026220).	The paper explicitly states that the nucleotide sequences are deposited in the National Centre for Biotechnology Information (NCBI), USA GenBank with the accession numbers KF026059-KF026220.	Yes
24655349	4	What were the GenBank accession numbers for sequenced HIV isolates?	Nucleotide sequences are deposited in National Centre for Biotechnology Information (NCBI), USA GenBank (Accession Number: KF026059-KF026220).	The paper explicitly states that the nucleotide sequences are deposited in the National Centre for Biotechnology Information (NCBI), USA GenBank with the accession numbers KF026059-KF026220.	KF026059-KF026220
24655349	5	How many individuals had samples obtained for HIV sequencing?	Viral RNA was determined in 160 baseline plasma samples; One hundred and sixty samples (73 males and 87 females) were amplified and sequenced for HIV-1 subtyping and genotypic drug resistance analysis.	The paper states that 160 baseline plasma samples were used for sequencing, indicating that samples were obtained from 160 individuals.	160
24655349	6	From which countries were the sequenced samples obtained?	HIV-1 chronically infected treatment naïve patients (N = 160) with advanced diseases (WHO clinical stages III and IV) above 18 years of age and seeking care and treatment at Gondar University Hospital for the first time, Northwest Ethiopia in 2008/2009 were recruited consecutively.	The paper mentions that the study was conducted on patients seeking care and treatment at Gondar University Hospital, Northwest Ethiopia. This indicates that the sequenced samples were obtained from Ethiopia.	Ethiopia
24655349	7	From what years were the sequenced samples obtained?	HIV-1 chronically infected treatment naïve patients (N = 160) with advanced diseases (WHO clinical stages III and IV) above 18 years of age and seeking care and treatment at Gondar University Hospital for the first time, Northwest Ethiopia in 2008/2009 were recruited consecutively.	The paper states that the patients were recruited consecutively in 2008/2009, indicating that the sequenced samples were obtained during these years.	2008/2009
24655349	8	Were samples cloned prior to sequencing?	Purified PCR products were subjected to direct sequencing of both sense and antisense strands using Big Dye Terminator Cycle Sequencing Ready Reaction kit (Applied Biosystems, Foster City, CA, USA).	The paper does not mention cloning of samples, it mentioned direct sequecing which is not a cloning method.	No
24655349	9	Which HIV genes were reported to have been sequenced?	The entire PR and the first 335 codons (76%) of the RT regions of the pol gene of the HIV-1 genome of 160 patients were amplified and sequenced using an in-house assay.	The paper specifies that the entire PR and the first 335 codons (76%) of the RT regions of the pol gene of the HIV-1 genome were amplified and sequenced.	PR, RT
24655349	10	What method was used for sequencing?	Purified PCR products were subjected to direct sequencing of both sense and antisense strands using Big Dye Terminator Cycle Sequencing Ready Reaction kit (Applied Biosystems, Foster City, CA, USA).	The paper describes the use of the Big Dye Terminator Cycle Sequencing Ready Reaction kit (Applied Biosystems), which is a method associated with Sanger sequencing.	Sanger sequencing
24655349	11	What type of samples were sequenced?	Viral RNA was determined in 160 baseline plasma samples. RNA extraction and plasma viral load determination RNA extraction was done with the Abbott m2000sp automated sample preparation system using mSample preparation system RNA kit.	The paper specifies that viral RNA was determined in 160 baseline plasma samples. It also mentions RNA extracion which indicates samples were from plasma.	Plasma
24655349	12	Were any sequences obtained from individuals with virological failure on a treatment regimen?	This study was aimed to determine the molecular characterization and pre-antiretroviral treatment resistance mutations among HIV-1 chronically infected ART naïve patients after the roll out of ART in Ethiopia; HIV-1 chronically infected treatment naïve patients (N = 160) with advanced diseases (WHO clinical stages III and IV) above 18 years of age and seeking care and treatment at Gondar Universi…	The paper was conducted on HIV-1 chronically infected treatment naïve patients, and the study is about pre-antiretroviral treatment resistance mtations, which means that the individuals had not started any treatment regimen.	No
24655349	13	Were the patients in the study in a clinical trial?	HIV-1 chronically infected treatment naïve patients (N = 160) with advanced diseases (WHO clinical stages III and IV) above 18 years of age and seeking care and treatment at Gondar University Hospital for the first time, Northwest Ethiopia in 2008/2009 were recruited consecutively.	The paper does not mention that the patients were in a clinical trial. It describes the recruitment of patients seeking care and treatment at Hospital.	No
24655349	14	Does the paper report HIV sequences from individuals who had previously received ARV drugs?	This study was aimed to determine the molecular characterization and pre-antiretroviral treatment resistance mutations among HIV-1 chronically infected ART naïve patients after the roll out of ART in Ethiopia. HIV-1 chronically infected treatment naïve patients (N = 160) with advanced diseases (WHO clinical stages III and IV) above 18 years of age and seeking care and treatment at Gondar Universi…	The paper was conducted on HIV-1 chronically infected treatment naïve patients, and HIV-chronically treatment naïve patients (N = 160) were recruited consecutively.	No
24655349	15	Which drug classes were received by individuals in the study before sample sequencing?	This study was aimed to determine the molecular characterization and pre-antiretroviral treatment resistance mutations among HIV-1 chronically infected ART naïve patients after the roll out of ART in Ethiopia. HIV-1 chronically infected treatment naïve patients (N = 160) with advanced diseases (WHO clinical stages III and IV) above 18 years of age and seeking care and treatment at Gondar Universi…	The paper was conducted on treatment naïve patients, meaning that they had not received any antiretroviral drugs before sample sequencing.	None
24655349	16	Which drugs were received by individuals in the study before sample sequencing?	This study was aimed to determine the molecular characterization and pre-antiretroviral treatment resistance mutations among HIV-1 chronically infected ART naïve patients after the roll out of ART in Ethiopia. HIV-1 chronically infected treatment naïve patients (N = 160) with advanced diseases (WHO clinical stages III and IV) above 18 years of age and seeking care and treatment at Gondar Universi…	The paper was conducted on treatment naïve patients, meaning that they had not received any antiretroviral drugs before sample sequencing.	None
25261422	1	Does the paper report HIV sequences from patient samples?	We investigated individuals who were newly diagnosed with HIV-1 in two centres in the Netherlands: University Medical Center Utrecht and Rijnstate Hospital in Arnhem. All patients were participants of the Dutch ATHENA Cohort, which has been approved by the local and national institutional review boards."	The paper mentions the inclusion of patients diagnosed with HIV-1 and the analysis of their baseline genotypic resistance tests.	Yes
25261422	2	Does the paper report in vitro drug susceptibility data?	Phenotypic drug susceptibility, Viruses resulting from the in vitro selection experiments were expanded by infecting 2 × 106 SupT1 cells in the absence of drugs. The in vitro drug susceptibility of the virus panel was determined using a multiple cycle assay.22 Resistance was defined as the fold increase in EC50 compared with the WT laboratory strain HXB2. At least two independent experiments were…	The paper provides detailed information on in vitro drug susceptibility experiments. It describes the use of a multiple cycle assay to determine the in vitro drug susceptibility of the virus panel and defines resistance as the fold increase in EC50 compared with the WT laboratory strain HXB2.	Yes
25261422	3	Were sequences from the paper made publicly available?	No evidence	The provided paper content does not mention any GenBank accession numbers for the sequenced HIV isolates.	No
25261422	4	What were the GenBank accession numbers for sequenced HIV isolates?	No evidence	The provided paper content does not mention any GenBank accession numbers for the sequenced HIV isolates.	Not reported
25261422	5	How many individuals had samples obtained for HIV sequencing?	Of the 265 included patients, 90% were male. The main transmission route was MSM (72%). Most patients were infected with HIV-1 subtype B (80%). At baseline, the median CD4 count was 290 cells/mm3 and median log plasma HIV RNA was 5.1 copies/mL. Except for a slightly higher HIV RNA (5.5 versus 5.1, P = 0.033), the baseline characteristics of patients diagnosed with an M41L variant were comparable …	The paper states that 265 patients were included in the analysis, the baseline variants were determined, which indicating that samples from 265 individuals were obtained for HIV sequencing.	265
25261422	6	From which countries were the sequenced samples obtained?	"We investigated individuals who were newly diagnosed with HIV-1 in two centres in the Netherlands: University Medical Center Utrecht and Rijnstate Hospital in Arnhem."	The paper mentions that the study population included individuals newly diagnosed with HIV-1 in two centers in the Netherlands: University Medical Center Utrecht and Rijnstate Hospital in Arnhem.	Netherlands
25261422	7	From what years were the sequenced samples obtained?	"Inclusion criteria were as follows: (i) baseline genotypic resistance test generated between 2007 and 2010; (ii) initiation of first-line therapy with a tenofovir/emtricitabine-containing regimen; (iii) ≥1 year of clinical follow-up after therapy initiation; and (iv) detection of WT virus or a variant harbouring M41L as the only resistance mutation according to the IAS-USA list of resistance mut…	The paper specifies that the baseline genotypic resistance tests were generated between 2007 and 2010.	2007-2010
25261422	8	Were samples cloned prior to sequencing?	We investigated individuals who were newly diagnosed with HIV-1 in two centres in the Netherlands: University Medical Center Utrecht and Rijnstate Hospital in Arnhem. All patients were participants of the Dutch ATHENA Cohort, which has been approved by the local and national institutional review boards. Inclusion criteria were as follows: (i) baseline genotypic resistance test generated between 2…	The paper does not mention any cloning of samples prior to sequencing. The paper doesn't mention the sequencing method.	Not reported
25261422	9	Which HIV genes were reported to have been sequenced?	"The N-terminus of RT (amino acids 25--314) of both patient-derived viruses was amplified, digested and ligated using the previously described NRT vector system. After five (tenofovir and tenofovir + emtricitabine) or six passages (emtricitabine), viral RNA was isolated for genotypic analysis of the entire RT gene."	The paper specifically mentions the sequencing of the N-terminus of the RT gene (amino acids 25-314) and the entire RT gene for genotypic analysis.	RT
25261422	10	What method was used for sequencing?	We investigated individuals who were newly diagnosed with HIV-1 in two centres in the Netherlands: University Medical Center Utrecht and Rijnstate Hospital in Arnhem. All patients were participants of the Dutch ATHENA Cohort, which has been approved by the local and national institutional review boards. Inclusion criteria were as follows: (i) baseline genotypic resistance test generated between 2…	The paper doesn't mention the sequencing method.	Not reported
25261422	11	What type of samples were sequenced?	Of the 265 included patients, 90% were male. The main transmission route was MSM (72%). Most patients were infected with HIV-1 subtype B (80%). At baseline, the median CD4 count was 290 cells/mm3 and median log plasma HIV RNA was 5.1 copies/mL	The paper mentions the use of plasma HIV RNA.	Plasma
25261422	12	Were any sequences obtained from individuals with virological failure on a treatment regimen?	The rate of virological failure during the first year of treatment was comparable between patients diagnosed with an M41L variant or WT virus \[1/17 (5.9%) versus 12/236 (5.1%), *P* = 0.586\]. For 7 of the 12 patients diagnosed with WT virus, genotypic resistance analysis was successfully performed during virological failure, which revealed no selection of TAMs, K65R or K70E. (ii) initiation of f…	The paper describes the analysis of virological outcomes, including virological failure, in patients on tenofovir/emtricitabine-containing regimens. It mentions that resistance testing was performed during virological failure.	Yes
25261422	13	Were the patients in the study in a clinical trial?	We investigated individuals who were newly diagnosed with HIV-1 in two centres in the Netherlands: University Medical Center Utrecht and Rijnstate Hospital in Arnhem.	The paper does not mention that the patients were part of a clinical trial. It describes the patients were from two centres.	No
25261422	14	Does the paper report HIV sequences from individuals who had previously received ARV drugs?	We investigated individuals who were newly diagnosed with HIV-1 in two centres in the Netherlands: University Medical Center Utrecht and Rijnstate Hospital in Arnhem. All patients were participants of the Dutch ATHENA Cohort, which has been approved by the local and national institutional review boards. Inclusion criteria were as follows: (i) baseline genotypic resistance test generated between 2…	The paper mentioned that patients were on first line therapy with a tenofovir/emtricitabine-containing regimen	Yes
25261422	15	Which drug classes were received by individuals in the study before sample sequencing?	We investigated individuals who were newly diagnosed with HIV-1 in two centres in the Netherlands: University Medical Center Utrecht and Rijnstate Hospital in Arnhem. All patients were participants of the Dutch ATHENA Cohort, which has been approved by the local and national institutional review boards. Inclusion criteria were as follows: (i) baseline genotypic resistance test generated between 2…	They study mentioned that the individuals were newly diagnosed with HIV-1, and on first line therapy with a tenofovir/emtricitabine-containing regimen.	NRTI
25261422	16	Which drugs were received by individuals in the study before sample sequencing?	We investigated individuals who were newly diagnosed with HIV-1 in two centres in the Netherlands: University Medical Center Utrecht and Rijnstate Hospital in Arnhem. All patients were participants of the Dutch ATHENA Cohort, which has been approved by the local and national institutional review boards. Inclusion criteria were as follows: (i) baseline genotypic resistance test generated between 2…	They study mentioned that the individuals were newly diagnosed with HIV-1, and on first line therapy with a tenofovir/emtricitabine-containing regimen.	Tenofovir, Emtricitabine
25273080	1	Does the paper report HIV sequences from patient samples?	"Last, the HIV-1 reverse transcriptase sequences at cART initiation and failure were evaluated and compared regarding mutations that resulted in at least low-level resistance according to the Stanford Resistance Database."	The paper mentions that HIV-1 reverse transcriptase sequences at cART initiation and failure were evaluated and compared regarding mutations that resulted in at least low-level resistance according to the Stanford Resistance Database.	Yes
25273080	2	Does the paper report in vitro drug susceptibility data?	This was an observational study using data from the AIDS Therapy Evaluation in the Netherlands (ATHENA) nationwide HIV cohort. The virological responses to lamivudine and emtricitabine were compared by multivariable adjusted logistic regression and Cox proportional hazard models. Sensitivity analyses included propensity score--adjusted models.	The paper focuses on clinical outcomes and virological responses in patients, but it does not mention any in vitro drug susceptibility testing.	No
25273080	3	Were sequences from the paper made publicly available?	No evidence	The paper does not provide any GenBank accession numbers for the sequenced HIV isolates.	No
25273080	4	What were the GenBank accession numbers for sequenced HIV isolates?	No evidence	The paper does not provide any GenBank accession numbers for the sequenced HIV isolates.	Not reported
25273080	5	How many individuals had samples obtained for HIV sequencing?	"Acquired resistance to reverse transcriptase was evaluated in 267 of 4740 HIV-1--infected patients, including 234 patients with registered virological failure within 240 weeks and 33 patients with HIV RNA ≥400 copies/mL at week 48."	The paper mentions that acquired resistance to reverse transcriptase was evaluated in 267 of 4740 HIV-1--infected patients.	267
25273080	6	From which countries were the sequenced samples obtained?	"This was an observational study using data from the AIDS Therapy Evaluation in the Netherlands (ATHENA) nationwide HIV cohort. HIV-infected individuals in the Netherlands are registered in the nationwide cohort maintained by the HIV Monitoring Foundation (Stichting HIV Monitoring), known as the AIDS Therapy Evaluation in the Netherlands (ATHENA) cohort."	The study was conducted using data from the AIDS Therapy Evaluation in the Netherlands (ATHENA) nationwide HIV cohort, which includes HIV-infected individuals in the Netherlands.	Netherlands
25273080	7	From what years were the sequenced samples obtained?	"For this study, we identified HIV-infected adults from ATHENA who initiated lamivudine or emtricitabine in cART with either efavirenz/tenofovir or nevirapine/tenofovir between 1 January 2002 and 31 January 2012."	The study identified HIV-infected adults from ATHENA who initiated lamivudine or emtricitabine in cART with either efavirenz/tenofovir or nevirapine/tenofovir between 1 January 2002 and 31 January 2012.	2002-2012
25273080	8	Were samples cloned prior to sequencing?	Last, the HIV-1 reverse transcriptase sequences at cART initiation and failure were evaluated and compared regarding mutations that resulted in at least low-level resistance according to the Stanford Resistance Database.	The paper does not mention that samples were cloned prior to sequencing.	Not reported
25273080	9	Which HIV genes were reported to have been sequenced?	"Last, the HIV-1 reverse transcriptase sequences at cART initiation and failure were evaluated and compared regarding mutations that resulted in at least low-level resistance according to the Stanford Resistance Database."	The paper mentions that HIV-1 reverse transcriptase sequences were evaluated and compared regarding mutations.	RT
25273080	10	What method was used for sequencing?	Last, the HIV-1 reverse transcriptase sequences at cART initiation and failure were evaluated and compared regarding mutations that resulted in at least low-level resistance according to the Stanford Resistance Database.	The paper does not specify the method used for sequencing.	Not reported
25273080	11	What type of samples were sequenced?	Increased Virological Failure in Naive HIV-1–Infected Patients Taking Lamivudine Compared With Emtricitabine in Combination With Tenofovir and Efavirenz or Nevirapine in the Dutch Nationwide ATHENA Cohort. The reasons for switching ART were registered by the treating physicians and included, among other reasons, virological failure and toxicity. Last, the HIV-1 reverse transcriptase sequences at …	The paper mentioned the study was focusing on individuals experienced virological failures, which means the samples were collected from plasma.	Plasma
25273080	12	Were any sequences obtained from individuals with virological failure on a treatment regimen?	"Last, the HIV-1 reverse transcriptase sequences at cART initiation and failure were evaluated and compared regarding mutations that resulted in at least low-level resistance according to the Stanford Resistance Database."	The paper mentions that HIV-1 reverse transcriptase sequences at cART initiation and failure were evaluated, indicating that sequences were obtained from individuals with virological failure.	Yes
25273080	13	Were the patients in the study in a clinical trial?	This was an observational study using data from the AIDS Therapy Evaluation in the Netherlands (ATHENA) nationwide HIV cohort.	The paper was an observational study using data from the ATHENA cohort, not a clinical trial.	No
25273080	14	Does the paper report HIV sequences from individuals who had previously received ARV drugs?	Therapy-naive HIV-1–infected patients without baseline resistance (N = 4740) initiated lamivudine or emtricitabine with efavirenz/tenofovir or nevirapine/tenofovir. Last, the HIV-1 reverse transcriptase sequences at cART initiation and failure were evaluated and compared regarding mutations that resulted in at least low-level resistance according to the Stanford Resistance Database	The paper mentioned that the sample at cART initiation and failure were evaluated.	Yes
25273080	15	Which drug classes were received by individuals in the study before sample sequencing?	"Therapy-naive HIV-1--infected patients without baseline resistance (N = 4740) initiated lamivudine or emtricitabine with efavirenz/tenofovir or nevirapine/tenofovir."	The paper involved patients who initiated lamivudine or emtricitabine (NRTIs) in combination with efavirenz or nevirapine (NNRTIs).	NRTI, NNRTI
25273080	16	Which drugs were received by individuals in the study before sample sequencing?	"Therapy-naive HIV-1--infected patients without baseline resistance (N = 4740) initiated lamivudine or emtricitabine with efavirenz/tenofovir or nevirapine/tenofovir."	The paper involved patients who initiated lamivudine or emtricitabine in combination with efavirenz/tenofovir or nevirapine/tenofovir.	Lamivudine (3TC), Emtricitabine (FTC), Efavirenz (EFV), Nevirapine (NVP), Tenofovir (TFV)
25281399	1	Does the paper report HIV sequences from patient samples?	"Here, we report the evolution of resistance to dolutegravir in a highly treatment-experienced patient harbouring the major N155H mutation consequent to raltegravir treatment failure. Genotypic and phenotypic analyses were done on longitudinal samples to determine viral resistance to INIs. The full-length integrase (867 bp) and protease/reverse transcriptase (1467 bp) genes were analysed by neste…	The paper discusses the evolution of resistance to dolutegravir in a highly treatment-experienced patient. It mentions genotypic and phenotypic analyses done on longitudinal samples to determine viral resistance, indicating that HIV sequences from patient samples were reported.	Yes
25281399	2	Does the paper report in vitro drug susceptibility data?	Phenotypic resistance analysis, The previously genotyped plasmas were sent for analysis of phenotypic, susceptibility to INIs, NRTIs, NNRTIs and PIs to Monogram Biosciences, where the highly sensitive phenotypic resistance assays PhenoSense and PhenoSense Integrase (Monogram Biosciences) were performed."	The paper mentions phenotypic resistance analysis, which involves testing the susceptibility of the virus to various drugs in vitro. This is evident from the mention of phenotypic susceptibility assays performed by Monogram Biosciences.	Yes
25281399	3	Were sequences from the paper made publicly available?	No evidence	The paper does not provide any GenBank accession numbers for the sequenced HIV isolates. There is no mention of accession numbers in the provided content.	No
25281399	4	What were the GenBank accession numbers for sequenced HIV isolates?	No evidence	The paper does not provide any GenBank accession numbers for the sequenced HIV isolates. There is no mention of accession numbers in the provided content.	Not reported
25281399	5	How many individuals had samples obtained for HIV sequencing?	"Here, we report the evolution of resistance to dolutegravir in a highly treatment-experienced patient harbouring the major N155H mutation consequent to raltegravir treatment failure. This patient had been under HIV treatment for 20 years and had received drugs against all available ARV targets, including raltegravir (5 October 2009 to 21 April 2010; 11 May 2011 to 15 February 2012) and dolutegra…	The paper focuses on a single patient who was heavily treatment-experienced and had developed resistance to multiple drugs, including dolutegravir.	1
25281399	6	From which countries were the sequenced samples obtained?	HIV RNA plasma viral loads were determined using the Versant HIV-1 RNA 3.0 assay (bDNA, Bayer HealthCare) until June 2010 and the Abbott Real-Time HIV-1 kit thereafter. CD4 T cell counts were evaluated every 3–6 months as suggested by Quebec provincial guidelines-02W.pdf )."	The paper mentions following guidelines from Quebec on the patient, suggesting the only patient in this paper is located and from Canada.	Canada
25281399	7	From what years were the sequenced samples obtained?	"To model interactions of integrase with raltegravir and dolutegravir, integrase amino acid sequences prior to treatment with INIs (29 August 2009) and following raltegravir failure (16 February 2012) and dolutegravir failure (30 October 2013) were submitted to the I-TASSER 3D protein prediction server, as previously described."	The paper provides a timeline of the patient's treatment and the acquisition of resistance mutations, indicating that the sequenced samples were obtained between 2009 and 2013.	2009-2013
25281399	8	Were samples cloned prior to sequencing?	The full-length integrase (867 bp) and protease/reverse transcriptase (1467 bp) genes were analysed by nested RT-PCR and sequenced using the BigDye Terminator Cycle Sequencing v1.0 Ready Reaction kit (Life Technologies), as previously described.	The paper does not mention any cloning of samples prior to sequencing.	No
25281399	9	Which HIV genes were reported to have been sequenced?	"The full-length integrase (867 bp) and protease/reverse transcriptase (1467 bp) genes were analysed by nested RT--PCR and sequenced using the BigDye Terminator Cycle Sequencing v1.0 Ready Reaction kit (Life Technologies), as previously described."	The paper mentions the sequencing of the full-length integrase gene and the protease/reverse transcriptase genes. These genes were analyzed by nested RT-PCR and sequenced using the BigDye Terminator Cycle Sequencing kit.	PR, RT, IN
25281399	10	What method was used for sequencing?	The full-length integrase (867 bp) and protease/reverse transcriptase (1467 bp) genes were analysed by nested RT-PCR and sequenced using the BigDye Terminator Cycle Sequencing v1.0 Ready Reaction kit (Life Technologies), as previously described.	The paper mentions the use of the BigDye Terminator Cycle Sequencing v1.0 Ready Reaction kit, which is a method associated with Sanger sequencing.	Sanger sequencing
25281399	11	What type of samples were sequenced?	The previously genotyped plasmas were sent for analysis of phenotypic susceptibility to INIs, NRTIs, NNRTIs and PIs to Monogram Biosciences	The paper mentions that plasma were genotyped.	Plasma
25281399	12	Were any sequences obtained from individuals with virological failure on a treatment regimen?	"Here, we report the evolution of resistance to dolutegravir in a highly treatment-experienced patient harbouring the major N155H mutation consequent to raltegravir treatment failure. The patient developed treatment failure with 63.6-fold resistance to dolutegravir and a maximum of 150-fold cross-resistance to raltegravir and elvitegravir."	The paper discusses the evolution of resistance to dolutegravir in a patient who experienced treatment failure with raltegravir and dolutegravir.	Yes
25281399	13	Were the patients in the study in a clinical trial?	This patient had been under HIV treatment for 20 years and had received drugs against all available ARV targets, including raltegravir (5 October 2009 to 21 April 2010; 11 May 2011 to 15 February 2012) and dolutegravir (15 February 2012 to 10 March 2014).	The paper mentions the study is a case report of a single patient with a detailed history of treatment and resistance development, which means it's not a clinical trial.	No
25281399	14	Does the paper report HIV sequences from individuals who had previously received ARV drugs?	This patient had been under HIV treatment for 20 years and had received drugs against all available ARV targets, including raltegravir (5 October 2009 to 21 April 2010; 11 May 2011 to 15 February 2012) and dolutegravir (15 February 2012 to 10 March 2014).	The paper discusses a patient who had been under HIV treatment for 20 years and had received drugs against all available ARV targets, indicating that the individual had previously received ARV drugs.	Yes
25281399	15	Which drug classes were received by individuals in the study before sample sequencing?	This patient had been under HIV treatment for 20 years and had received drugs against all available ARV targets, including raltegravir (5 October 2009 to 21 April 2010; 11 May 2011 to 15 February 2012) and dolutegravir (15 February 2012 to 10 March 2014).	The paper mentions that the patient had received drugs INSTIs (integrase inhibitors), and all available ARV targets, which include NRTI,NNRTI, PI, INSTI.	NRTI,NNRTI, PI, INSTI
25281399	16	Which drugs were received by individuals in the study before sample sequencing?	This patient had been under HIV treatment for 20 years and had received drugs against all available ARV targets, including raltegravir (5 October 2009 to 21 April 2010; 11 May 2011 to 15 February 2012) and dolutegravir (15 February 2012 to 10 March 2014).	The paper mentions that the patient had received drugs INSTIs (integrase inhibitors), and all available ARV targets, which include NRTI,NNRTI, PI, INSTI, the non-INSTI drug received by the individual is not reported.	Raltegravir (RAL), Dolutegravir (DTG)
25348535	1	Does the paper report HIV sequences from patient samples?	We characterized this double mutant with respect to integrase strand transfer activity and susceptibility to DTG both biochemically and in tissue culture. We showed that the addition of R262K to H51Y decreased recombinant integrase strand transfer activity but improved integrase DNA-binding affinity, compared to wild-type or H51Y-containing enzymes.	The paper does not mention the use of patient samples for obtaining HIV sequences. It focus on the integrase strand transfer activity and susceptibility to DTG both biochemically and in tissue culture	No
25348535	2	Does the paper report in vitro drug susceptibility data?	"The combination of H51Y and R262K substitutions slightly decreased susceptibility to DTG (fold change = 1.87) in cell-based resistance assays. HIV susceptibility to DTG and RAL was determined using short-term resistance assays with TZM-bl cells, as described previously (8)."; The addition of R262K to H51Y decreases HIV-1 susceptibility to DTG. To further characterize the R262K secondary substitu…	The paper includes in vitro drug susceptibility data, specifically examining the susceptibility of HIV-1 to dolutegravir (DTG) and raltegravir (RAL) using short-term resistance assays with TZM-bl cells.	Yes
25348535	3	Were sequences from the paper made publicly available?	No evidence	The paper does not provide any GenBank accession numbers for sequenced HIV isolates. This is an in vitro paper focusing on laboratory-based studies and does not mention the submission of sequences to GenBank.	No
25348535	4	What were the GenBank accession numbers for sequenced HIV isolates?	No evidence	The paper does not provide any GenBank accession numbers for sequenced HIV isolates. This is an in vitro paper focusing on laboratory-based studies and does not mention the submission of sequences to GenBank.	Not reported
25348535	5	How many individuals had samples obtained for HIV sequencing?	In a recent selection study with DTG, using a virus bearing the H51Y substitution in integrase, the emergence of an R to K substitution at position 262 (R262K) was observed. We characterized this double mutant with respect to integrase strand transfer activity and susceptibility to DTG both biochemically and in tissue culture.	The paper mentioned the study was about integrase transfer activity and susceptiblity, no sequences samples were from individuals.	Not reported
25348535	6	From which countries were the sequenced samples obtained?	No evidence	The sequenced samples in this study were obtained from various clinical studies and cohort analyses, but none of the samples were directly sourced from individual patients in this particular in vitro investigation. The study is entirely laboratory-based, highlighting the mechanistic understanding of drug resistance mutations in a controlled in vitro setting.	Not reported
25348535	7	From what years were the sequenced samples obtained?	No evidence	The paper does not provide any information on the years from which sequenced samples were obtained. It focuses on laboratory-based studies and does not mention the timeline of sample collection.	Not reported
25348535	8	Were samples cloned prior to sequencing?	No evidence	The paper does not mention the sequencing method used, nor samples were cloned prior to sequencing.	Not reported
25348535	9	Which HIV genes were reported to have been sequenced?	"The creation of pET-15b expression plasmids coding for soluble wild-type (WT) and H51Y-mutated HIV subtype B IN (INB) was described previously (14). The R262K substitution was introduced to create the pET-15b INB(R262K) and pET-15b INB(H51Y/R262K) plasmids by using a Q5 site-directed mutagenesis kit (New England BioLabs), according to the manufacturer\'s instructions. The aforementioned substitu…	The paper focuses on the integrase (IN) gene of HIV-1, particularly examining mutations and their effects on drug resistance and enzyme activity.	IN
25348535	10	What method was used for sequencing?	No evidence	The paper does not mention the sequencing method used.	Not reported
25348535	11	What type of samples were sequenced?	In a recent selection study with DTG, using a virus bearing the H51Y substitution in integrase, the emergence of an R to K substitution at position 262 (R262K) was observed. We characterized this double mutant with respect to integrase strand transfer activity and susceptibility to DTG both biochemically and in tissue culture.	The paper mentioned the study was about integrase transfer activity and susceptiblity, no sequences samples were from individuals.	Not reported
25348535	12	Were any sequences obtained from individuals with virological failure on a treatment regimen?	In a recent selection study with DTG, using a virus bearing the H51Y substitution in integrase, the emergence of an R to K substitution at position 262 (R262K) was observed. We characterized this double mutant with respect to integrase strand transfer activity and susceptibility to DTG both biochemically and in tissue culture.	The paper mentioned the study was about integrase transfer activity and susceptiblity, no sequences samples were from individuals.	Not reported
25348535	13	Were the patients in the study in a clinical trial?	In a recent selection study with DTG, using a virus bearing the H51Y substitution in integrase, the emergence of an R to K substitution at position 262 (R262K) was observed. We characterized this double mutant with respect to integrase strand transfer activity and susceptibility to DTG both biochemically and in tissue culture.	The paper mentioned the study was about integrase transfer activity and susceptiblity, no sequences samples were from individuals.	Not reported
25348535	14	Does the paper report HIV sequences from individuals who had previously received ARV drugs?	In a recent selection study with DTG, using a virus bearing the H51Y substitution in integrase, the emergence of an R to K substitution at position 262 (R262K) was observed. We characterized this double mutant with respect to integrase strand transfer activity and susceptibility to DTG both biochemically and in tissue culture.	The paper mentioned the study was about integrase transfer activity and susceptiblity, no sequences samples were from individuals.	Not reported
25348535	15	Which drug classes were received by individuals in the study before sample sequencing?	In a recent selection study with DTG, using a virus bearing the H51Y substitution in integrase, the emergence of an R to K substitution at position 262 (R262K) was observed. We characterized this double mutant with respect to integrase strand transfer activity and susceptibility to DTG both biochemically and in tissue culture.	The paper mentioned the study was about integrase transfer activity and susceptiblity, no sequences samples were from individuals.	Not reported
25348535	16	Which drugs were received by individuals in the study before sample sequencing?	In a recent selection study with DTG, using a virus bearing the H51Y substitution in integrase, the emergence of an R to K substitution at position 262 (R262K) was observed. We characterized this double mutant with respect to integrase strand transfer activity and susceptibility to DTG both biochemically and in tissue culture.	The paper mentioned the study was about integrase transfer activity and susceptiblity, no sequences samples were from individuals.	Not reported
25355888	1	Does the paper report HIV sequences from patient samples?	Plasma samples from HIV-2 subtype A patients in the French National HIV-2 cohort were collected. The complete RT sequences of 19 ARV-naive and 35 ARV-treated patients failing an NRTI-containing regimen were analyzed.	The paper mentions that plasma samples from HIV-2 subtype A patients were collected and sequenced. This indicates that the study involved obtaining HIV sequences from patient samples.	Yes
25355888	2	Does the paper report in vitro drug susceptibility data?	We show that V111I does not strongly affect drug susceptibility but increases the replication capacity of the K65R and Q151M viruses. Biochemical assays demonstrate that V111I restores the polymerization defects of the K65R and Q151M viruses but negatively affects the fidelity of the HIV-2 RT enzyme. Drug susceptibility assays. Virus stocks were titrated, and equal amounts of infectious virus wer…	The paper mentions drug susceptibility assays and was using TZM-bl cells assay	Yes
25355888	3	Were sequences from the paper made publicly available?	The HIV-2 RT and RNase H sequences were deposited in GenBank with accession numbers KM208882 to KM208955.	The paper explicitly states that the HIV-2 RT and RNase H sequences were deposited in GenBank with accession numbers KM208882 to KM208955.	Yes
25355888	4	What were the GenBank accession numbers for sequenced HIV isolates?	The HIV-2 RT and RNase H sequences were deposited in GenBank with accession numbers KM208882 to KM208955.	The paper explicitly states that the HIV-2 RT and RNase H sequences were deposited in GenBank with accession numbers KM208882 to KM208955.	KM208882 to KM208955
25355888	5	How many individuals had samples obtained for HIV sequencing?	The complete RT sequences of 19 ARV-naive and 35 ARV-treated patients failing an NRTI-containing regimen were analyzed.	The paper states that the complete RT sequences of 19 ARV-naive and 35 ARV-treated patients were analyzed, totaling 54 individuals.	54
25355888	6	From which countries were the sequenced samples obtained?	Plasma samples from HIV-2 subtype A patients in the French National HIV-2 cohort were collected.	The paper specifies that the plasma samples were collected from HIV-2 subtype A patients in the French National HIV-2 cohort.	France
25355888	7	From what years were the sequenced samples obtained?	No evidence	The paper does not provide specific years during which the sequenced samples were obtained.	Not reported
25355888	8	Were samples cloned prior to sequencing?	The nested-PCR products were sequenced using ABI Technologies RTC, RT4, RT3, RT2, RT4S, and Pol D primers.	The paper does not mention any cloning of samples prior to sequencing.	No
25355888	9	Which HIV genes were reported to have been sequenced?	In this study, therefore, we analyzed the polymerase, connection, and RNase H domains of RT in HIV-2 patients failing NRTI-containing therapies; The complete RT sequences of 19 ARV-naive and 35 ARV-treated patients failing an NRTI-containing regimen were analyzed.	The paper mentions the sequencing of the complete RT genes including polymerase, connection, and RNase H domains of RT	RT
25355888	10	What method was used for sequencing?	The nested-PCR products were sequenced using ABI Technologies RTC, RT4, RT3, RT2, RT4S, and Pol D primers.	The paper describes the use of ABI Technologies, which is indicative of Sanger sequencing.	Sanger sequencing
25355888	11	What type of samples were sequenced?	Plasma samples from HIV-2 subtype A patients in the French National HIV-2 cohort were collected.	The paper specifies that plasma samples from HIV-2 subtype A patients were collected and sequenced.	Plasma
25355888	12	Were any sequences obtained from individuals with virological failure on a treatment regimen?	The complete RT sequences of 19 ARV-naive and 35 ARV-treated patients failing an NRTI-containing regimen were analyzed.	The paper mentions that the complete RT sequences of 35 ARV-treated patients failing an NRTI-containing regimen were analyzed.	Yes
25355888	13	Were the patients in the study in a clinical trial?	Plasma samples from HIV-2 subtype A patients in the French National HIV-2 cohort were collected.	The paper does not mention that the patients were part of a clinical trial; they were part of the French National HIV-2 cohort.	No
25355888	14	Does the paper report HIV sequences from individuals who had previously received ARV drugs?	The complete RT sequences of 19 ARV-naive and 35 ARV-treated patients failing an NRTI-containing regimen were analyzed.	The paper mentions that 35 ARV-treated patients had their complete RT sequences analyzed.	Yes
25355888	15	Which drug classes were received by individuals in the study before sample sequencing?	At the time of virological failure, the patients were on regimens containing the NRTIs AZT (55%), didanosine (ddI) (18%), d4T (21%), lamivudine (3TC) (73%), ABC (18%), and tenofovir (TDF) (24%).	The paper lists the specific NRTIs that the patients were on at the time of virological failure.	NRTI
25355888	16	Which drugs were received by individuals in the study before sample sequencing?	At the time of virological failure, the patients were on regimens containing the NRTIs AZT (55%), didanosine (ddI) (18%), d4T (21%), lamivudine (3TC) (73%), ABC (18%), and tenofovir (TDF) (24%).	The paper lists the specific NRTIs that the patients were on at the time of virological failure.	Zidovudine (AZT), Didanosine (DDI), Stavudine (D4T), Lamivudine (3TC), Abacavir (ABC), Tenofovir (TFV)
25367908	1	Does the paper report HIV sequences from patient samples?	The in vitro antiviral profile and mechanism of action of GSK1265744 were established through integrase enzyme assays, resistance passage experiments, and cellular assays with site-directed molecular (SDM) HIV clones resistant to other classes of anti-HIV-1 agents and earlier INSTIs. MT-4 cells, a human T-cell leukemia virus type 1 (HTLV-1)-transformed human T-cell line, were maintained as descri…	The paper does not mention the use of patient samples for obtaining HIV sequences. Instead, it focuses on in vitro studies, resistance passage experiments, and cellular assays using site-directed molecular (SDM) HIV clones and other laboratory strains.	No
25367908	2	Does the paper report in vitro drug susceptibility data?	The in vitro antiviral profile and mechanism of action of GSK1265744 were established through integrase enzyme assays, resistance passage experiments, and cellular assays with site-directed molecular (SDM) HIV clones resistant to other classes of anti-HIV-1 agents and earlier INSTIs. MT-4 cells, a human T-cell leukemia virus type 1 (HTLV-1)-transformed human T-cell line, were maintained as descri…	The paper provides in vitro drug susceptibility data, through integrase enzyme assays, resistance passage experiments, and cellular assays with site-directed molecular (SDM) HIV clone	Yes
25367908	3	Were sequences from the paper made publicly available?	No evidence	The paper does not mention GenBank accession numbers. It focuses on in vitro studies and laboratory strains.	No
25367908	4	What were the GenBank accession numbers for sequenced HIV isolates?	No evidence	The paper does not mention GenBank accession numbers. It focuses on in vitro studies and laboratory strains.	Not reported
25367908	5	How many individuals had samples obtained for HIV sequencing?	The in vitro antiviral profile and mechanism of action of GSK1265744 were established through integrase enzyme assays, resistance passage experiments, and cellular assays with site-directed molecular (SDM) HIV clones resistant to other classes of anti-HIV-1 agents and earlier INSTIs.	The paper does not mention the sequencing of clinical specimens. Instead, it focuses on in vitro studies using laboratory strains and site-directed molecular (SDM) HIV clones.	Not reported
25367908	6	From which countries were the sequenced samples obtained?	No evidence	The paper does not mention the use of sequenced samples from any specific countries. It focuses on in vitro studies and laboratory strains.	Not reported
25367908	7	From what years were the sequenced samples obtained?	No evidence	The paper does not provide any information about the years from which sequenced samples were obtained. It focuses on in vitro studies and laboratory strains.	Not reported
25367908	8	Were samples cloned prior to sequencing?	"Sequencing of the products was provided by the Operon Biotechnologies sequencing service."	The paper does not mention the use of sample cloning. It focuses on the in vitro phenotypic susceptiblity test.	Not reported
25367908	9	Which HIV genes were reported to have been sequenced?	"The integrase region of HIV proviral DNA was amplified by PCR with specific primers (M-poli7, AACAAGTAGATAAATTAGTCAGT; M-poli8, TAGTGGGATGTGTACTTCTGAAC). We constructed IN region-recombinant HIV-1 molecular clones as described previously ( 14 )."	The paper focuses on the integrase gene of HIV-1, as it discusses the construction of integrase region-recombinant HIV-1 molecular clones and the sequencing of the integrase region of HIV proviral DNA.	IN
25367908	10	What method was used for sequencing?	"Sequencing of the products was provided by the Operon Biotechnologies sequencing service."	The paper mentions the use of sequencing services provided by Operon Biotechnologies, but does not mention the sequencing method.	Not reported
25367908	11	What type of samples were sequenced?	The in vitro antiviral profile and mechanism of action of GSK1265744 were established through integrase enzyme assays, resistance passage experiments, and cellular assays with site-directed molecular (SDM) HIV clones resistant to other classes of anti-HIV-1 agents and earlier INSTIs.	The paper does not mention the sequencing of clinical specimens. Instead, it focuses on in vitro studies using laboratory strains and site-directed molecular (SDM) HIV clones.	Not reported
25367908	12	Were any sequences obtained from individuals with virological failure on a treatment regimen?	The in vitro antiviral profile and mechanism of action of GSK1265744 were established through integrase enzyme assays, resistance passage experiments, and cellular assays with site-directed molecular (SDM) HIV clones resistant to other classes of anti-HIV-1 agents and earlier INSTIs.	The paper does not mention the sequencing of clinical specimens. Instead, it focuses on in vitro studies using laboratory strains and site-directed molecular (SDM) HIV clones.	Not reported
25367908	13	Were the patients in the study in a clinical trial?	The in vitro antiviral profile and mechanism of action of GSK1265744 were established through integrase enzyme assays, resistance passage experiments, and cellular assays with site-directed molecular (SDM) HIV clones resistant to other classes of anti-HIV-1 agents and earlier INSTIs.	The paper does not mention the sequencing of clinical specimens. Instead, it focuses on in vitro studies using laboratory strains and site-directed molecular (SDM) HIV clones.	Not reported
25367908	14	Does the paper report HIV sequences from individuals who had previously received ARV drugs?	The in vitro antiviral profile and mechanism of action of GSK1265744 were established through integrase enzyme assays, resistance passage experiments, and cellular assays with site-directed molecular (SDM) HIV clones resistant to other classes of anti-HIV-1 agents and earlier INSTIs.	The paper does not mention the sequencing of clinical specimens. Instead, it focuses on in vitro studies using laboratory strains and site-directed molecular (SDM) HIV clones.	Not reported
25367908	15	Which drug classes were received by individuals in the study before sample sequencing?	The in vitro antiviral profile and mechanism of action of GSK1265744 were established through integrase enzyme assays, resistance passage experiments, and cellular assays with site-directed molecular (SDM) HIV clones resistant to other classes of anti-HIV-1 agents and earlier INSTIs.	The paper does not mention the sequencing of clinical specimens. Instead, it focuses on in vitro studies using laboratory strains and site-directed molecular (SDM) HIV clones.	Not reported
25367908	16	Which drugs were received by individuals in the study before sample sequencing?	The in vitro antiviral profile and mechanism of action of GSK1265744 were established through integrase enzyme assays, resistance passage experiments, and cellular assays with site-directed molecular (SDM) HIV clones resistant to other classes of anti-HIV-1 agents and earlier INSTIs.	The paper does not mention the sequencing of clinical specimens. Instead, it focuses on in vitro studies using laboratory strains and site-directed molecular (SDM) HIV clones.	Not reported
25385110	1	Does the paper report HIV sequences from patient samples?	In Vitro Resistance Selection with Doravirine (MK-1439), a Novel Nonnucleoside Reverse Transcriptase Inhibitor with Distinct Mutation Development Pathways.In vitro resistance selection of subtype B virus (MT4-green fluorescent protein [GFP] cells), as well as subtype A and C viruses (MT4-GFP/CCR5 cells) was conducted with DOR, rilpivirine (RPV), and efavirine (EFV) under low-multiplicity-of-infec…	The paper focuses on in vitro resistance selection studies using HIV-1 subtype A, B, and C viruses in cell culture systems. It does not mention obtaining HIV sequences from patient samples.	No
25385110	2	Does the paper report in vitro drug susceptibility data?	The susceptibility of subtype B mutant viruses selected by DOR, RPV, and EFV to NNRTIs was evaluated. Results suggest that mutant viruses selected by DOR are susceptible to RPV and EFV and mutants selected by RPV and EFV are susceptible to DOR.	The paper mentions the susceptiblity of virus selected was evaluated.	Yes
25385110	3	Were sequences from the paper made publicly available?	No evidence	The paper does not mention the Genbank accession number for sequenced HIV isolates. It focuses on in vitro resistance selection studies and drug susceptiblity.	No
25385110	4	What were the GenBank accession numbers for sequenced HIV isolates?	No evidence	The paper does not mention the Genbank accession number for sequenced HIV isolates. It focuses on in vitro resistance selection studies and drug susceptiblity.	Not reported
25385110	5	How many individuals had samples obtained for HIV sequencing?	In vitro resistance selection of subtype B virus (MT4-green fluorescent protein [GFP] cells), as well as subtype A and C viruses (MT4-GFP/CCR5 cells) was conducted with DOR, rilpivirine (RPV), and efavirine (EFV) under low-multiplicity-of-infection conditions in a 96-well format. Resistance selection was performed with escalating concentrations of the NNRTIs ranging from the 95% effective concent…	The paper reported in vitro resistance selection of subtype B virus on DOR, RPV, EFV, becaues all viruses were from selection assay, no sequence were from HIV infected individuals.	Not reported
25385110	6	From which countries were the sequenced samples obtained?	No evidence	The paper does not mention any specific countries from which sequenced samples were obtained. It focuses on in vitro studies and does not provide information on the origin of patient samples.	Not reported
25385110	7	From what years were the sequenced samples obtained?	No evidence	The paper does not provide any information on the years from which sequenced samples were obtained. It focuses on in vitro resistance selection studies and does not mention the timeline of sample collection.	Not reported
25385110	8	Were samples cloned prior to sequencing?	In vitro resistance selection of subtype B virus (MT4-green fluorescent protein [GFP] cells), as well as subtype A and C viruses (MT4-GFP/CCR5 cells) was conducted with DOR, rilpivirine (RPV), and efavirine (EFV) under low-multiplicity-of-infection conditions in a 96-well format. Resistance selection was performed with escalating concentrations of the NNRTIs ranging from the 95% effective concent…	The paper reported in vitro resistance selection of subtype B virus on DOR, RPV, EFV, becaues all viruses were from selection assay, no sequence were from HIV infected individuals.	Not reported
25385110	9	Which HIV genes were reported to have been sequenced?	"The RT-encoding region was amplified by the one-step RT-PCR method. PCR products were genotyped by an automated population-based full-length sequencing method (covering amino acids 1 to 440 of the RT region). The primers used for PCR amplification of subtype B virus were AAGCAGGAGCCGATAGACAA (forward) and TAATCCCGAATCCTGCAAAGCTAGA (reverse). The sequencing primers were 5′-CCCTGTGGAAGCAC and 5′-G…	The paper focuses on the sequencing of the reverse transcriptase (RT) region of HIV-1. It mentions the amplification and sequencing of the RT-encoding region.	RT
25385110	10	What method was used for sequencing?	In vitro resistance selection of subtype B virus (MT4-green fluorescent protein [GFP] cells), as well as subtype A and C viruses (MT4-GFP/CCR5 cells) was conducted with DOR, rilpivirine (RPV), and efavirine (EFV) under low-multiplicity-of-infection conditions in a 96-well format. Resistance selection was performed with escalating concentrations of the NNRTIs ranging from the 95% effective concent…	The paper reported in vitro resistance selection of subtype B virus on DOR, RPV, EFV, becaues all viruses were from selection assay, no sequence were from HIV infected individuals.	Not reported
25385110	11	What type of samples were sequenced?	In vitro resistance selection of subtype B virus (MT4-green fluorescent protein [GFP] cells), as well as subtype A and C viruses (MT4-GFP/CCR5 cells) was conducted with DOR, rilpivirine (RPV), and efavirine (EFV) under low-multiplicity-of-infection conditions in a 96-well format. Resistance selection was performed with escalating concentrations of the NNRTIs ranging from the 95% effective concent…	The paper reported in vitro resistance selection of subtype B virus on DOR, RPV, EFV, becaues all viruses were from selection assay, no sequence were from HIV infected individuals.	Not reported
25385110	12	Were any sequences obtained from individuals with virological failure on a treatment regimen?	In vitro resistance selection of subtype B virus (MT4-green fluorescent protein [GFP] cells), as well as subtype A and C viruses (MT4-GFP/CCR5 cells) was conducted with DOR, rilpivirine (RPV), and efavirine (EFV) under low-multiplicity-of-infection conditions in a 96-well format. Resistance selection was performed with escalating concentrations of the NNRTIs ranging from the 95% effective concent…	The paper reported in vitro resistance selection of subtype B virus on DOR, RPV, EFV, becaues all viruses were from selection assay, no sequence were from HIV infected individuals.	Not reported
25385110	13	Were the patients in the study in a clinical trial?	In vitro resistance selection of subtype B virus (MT4-green fluorescent protein [GFP] cells), as well as subtype A and C viruses (MT4-GFP/CCR5 cells) was conducted with DOR, rilpivirine (RPV), and efavirine (EFV) under low-multiplicity-of-infection conditions in a 96-well format. Resistance selection was performed with escalating concentrations of the NNRTIs ranging from the 95% effective concent…	The paper reported in vitro resistance selection of subtype B virus on DOR, RPV, EFV, becaues all viruses were from selection assay, no sequence were from HIV infected individuals.	Not reported
25385110	14	Does the paper report HIV sequences from individuals who had previously received ARV drugs?	In vitro resistance selection of subtype B virus (MT4-green fluorescent protein [GFP] cells), as well as subtype A and C viruses (MT4-GFP/CCR5 cells) was conducted with DOR, rilpivirine (RPV), and efavirine (EFV) under low-multiplicity-of-infection conditions in a 96-well format. Resistance selection was performed with escalating concentrations of the NNRTIs ranging from the 95% effective concent…	The paper reported in vitro resistance selection of subtype B virus on DOR, RPV, EFV, becaues all viruses were from selection assay, no sequence were from HIV infected individuals.	Not reported
25385110	15	Which drug classes were received by individuals in the study before sample sequencing?	In vitro resistance selection of subtype B virus (MT4-green fluorescent protein [GFP] cells), as well as subtype A and C viruses (MT4-GFP/CCR5 cells) was conducted with DOR, rilpivirine (RPV), and efavirine (EFV) under low-multiplicity-of-infection conditions in a 96-well format. Resistance selection was performed with escalating concentrations of the NNRTIs ranging from the 95% effective concent…	The paper reported in vitro resistance selection of subtype B virus on DOR, RPV, EFV, becaues all viruses were from selection assay, no sequence were from HIV infected individuals.	Not reported
25385110	16	Which drugs were received by individuals in the study before sample sequencing?	In vitro resistance selection of subtype B virus (MT4-green fluorescent protein [GFP] cells), as well as subtype A and C viruses (MT4-GFP/CCR5 cells) was conducted with DOR, rilpivirine (RPV), and efavirine (EFV) under low-multiplicity-of-infection conditions in a 96-well format. Resistance selection was performed with escalating concentrations of the NNRTIs ranging from the 95% effective concent…	The paper reported in vitro resistance selection of subtype B virus on DOR, RPV, EFV, becaues all viruses were from selection assay, no sequence were from HIV infected individuals.	Not reported
25410050	1	Does the paper report HIV sequences from patient samples?	A total of 451 HIV-1-positive patient samples were collected by local CDC staff from 2004 to 2008 (Table 1); 5 ml of EDTA-treated whole blood was taken from HIV-1 patient, and all samples were transferred to Zhejiang CDC in less than 12 h. Viral RNA was extracted from patient plasma (140 μl) using QIAamp Viral RNA Mini kit (Qiagen, USA); HIV-1 cDNA was obtained through RT-PCR using the Takara One…	The paper mentions that a total of 451 HIV-1-positive patient samples were collected by local CDC staff from 2004 to 2008. It also describes the process of extracting viral RNA from patient plasma and sequencing the *gag* and *pol* gene fragments.	Yes
25410050	2	Does the paper report in vitro drug susceptibility data?	his study presented a dynamic analysis of HIV-1 subtype variation in Zhejiang from 2004 to 2008, based on the surveillance of molecular epidemiology or drug resistance. CRF01_AE was the major strain (43.5 %) spreading across the province, second by B/B′ (17.9 %), CRF07_BC (17.1 %), and CRF08_BC (13.7 %). The strains were mainly transmitted by heterosexual contact. Novel recombinant strains and ve…	The paper does not mention any in vitro drug susceptibility testing or data.The paper focuses on the molecular epidemiology and drug resistance surveillance of HIV-1 in Zhejiang Province, China.	No
25410050	3	Were sequences from the paper made publicly available?	"The HIV sequences are accessible in GenBank from KJ613998 to KJ614226 (Pol) and from KJ613666to KJ613997 (Gag)."	The paper provides the GenBank accession numbers for the sequences analyzed in the study in the "Acknowledgements" section.	Yes
25410050	4	What were the GenBank accession numbers for sequenced HIV isolates?	"The HIV sequences are accessible in GenBank from KJ613998 to KJ614226 (Pol) and from KJ613666to KJ613997 (Gag)."	The paper provides the GenBank accession numbers for the sequences analyzed in the study in the "Acknowledgements" section.	KJ613998 to KJ614226, KJ613666to KJ613997
25410050	5	How many individuals had samples obtained for HIV sequencing?	A total of 451 HIV-1-positive patient samples were collected by local CDC staff from 2004 to 2008; The 451 HIV-1-seropositive individuals were followed up by Zhejiang CDC during 2004--2008.	The paper states that a total of 451 HIV-1-positive patient samples were collected by local CDC staff from 2004 to 2008. These samples were used for the sequencing of the *gag* and *pol* gene fragments.	451
25410050	6	From which countries were the sequenced samples obtained?	Trends of subtype variation of human immunodeficiency virus type 1 in Zhejiang Province, China. Geographically, 57.6 % (n = 260) of the HIV-1-positive patients were local residents from all 11 cities of the province. Except for the seven unknown cases, the remaining 40.8 % (n = 184) originally came from the other 23 provinces of China	The paper states that the study was conducted in Zhejiang Province, China.	China
25410050	7	From what years were the sequenced samples obtained?	The study was conducted in a cross-sectional and anonymous manner in all 11 cities, based on the surveillance of molecular epidemiology or drug resistance. A total of 451 HIV-1-positive patient samples were collected by local CDC staff from 2004 to 2008 (Table 1 ).	Patient samples were collected 2004 to 2008	2004-2008
25410050	8	Were samples cloned prior to sequencing?	PCR products were purified using Qiagen gel extraction kit, and sequenced using an automated ABI 377 DNA Sequencer (Applied Biosystems).	The paper does not mention any process of cloning the samples prior to sequencing.	No
25410050	9	Which HIV genes were reported to have been sequenced?	HIV-1 cDNA was obtained through RT-PCR using the Takara One Step RNA PCR kit (Takara, China) and then subjected to nested polymerase chain reaction (PCR) for the amplification of *gag* and *pol* gene fragments; The portion of the *gag* gene p17--p24 region (HXB2, 836--1507 nt) and the *pol* gene fragment (HXB2, 2147--3462 nt) were selected for PCR amplification and phylogenetic analyses; During o…	The paper describes the sequencing of the *gag* and *pol* gene fragments from the HIV-1-positive patient samples. It provides details on the regions of these genes that were amplified and sequenced for phylogenetic analysis.	Gag, Pol
25410050	10	What method was used for sequencing?	PCR products were purified using Qiagen gel extraction kit, and sequenced using an automated ABI 377 DNA Sequencer (Applied Biosystems).	The paper mentions that PCR products were purified and sequenced using an automated ABI 377 DNA Sequencer, which is a method associated with Sanger sequencing.	Sanger sequencing
25410050	11	What type of samples were sequenced?	Viral RNA was extracted from patient plasma (140 μl) using QIAamp Viral RNA Mini kit (Qiagen, USA).	The paper specifies that viral RNA was extracted from patient plasma.	Plasma
25410050	12	Were any sequences obtained from individuals with virological failure on a treatment regimen?	A total of 451 HIV-1-positive patient samples were collected by local CDC staff from 2004 to 2008 (Table 1). Data were collected using an interviewer-administered questionnaire [4]. Every participant was assigned a unique and confidential identifier code for the questionnaire and specimens. Demographic variables were collected including age, gender, ethnicity, transmission route, education, birth…	The paper mentioned that "All blood samples originally tested by HIV antibody ELISA (Bio-Mérieux, France) at the local CDC were confirmed using Western-blot", which means these samples were for HIV infection testing, so the individuals were treatment naive, and had not previously received ARV drugs.	No
25410050	13	Were the patients in the study in a clinical trial?	The study was conducted in a cross-sectional and anonymous manner in all 11 cities, based on the surveillance of molecular epidemiology or drug resistance.	The paper does not mention that the patients were part of a clinical trial. It describes the study as a cross-sectional and anonymous surveillance of molecular epidemiology and drug resistance.	No
25410050	14	Does the paper report HIV sequences from individuals who had previously received ARV drugs?	A total of 451 HIV-1-positive patient samples were collected by local CDC staff from 2004 to 2008 (Table 1). Data were collected using an interviewer-administered questionnaire [4]. Every participant was assigned a unique and confidential identifier code for the questionnaire and specimens. Demographic variables were collected including age, gender, ethnicity, transmission route, education, birth…	The paper mentioned that "All blood samples originally tested by HIV antibody ELISA (Bio-Mérieux, France) at the local CDC were confirmed using Western-blot", which means these samples were for HIV infection testing, so the individuals were treatment naive, and had not previously received ARV drugs.	No
25410050	15	Which drug classes were received by individuals in the study before sample sequencing?	A total of 451 HIV-1-positive patient samples were collected by local CDC staff from 2004 to 2008 (Table 1). Data were collected using an interviewer-administered questionnaire [4]. Every participant was assigned a unique and confidential identifier code for the questionnaire and specimens. Demographic variables were collected including age, gender, ethnicity, transmission route, education, birth…	The paper mentioned that "All blood samples originally tested by HIV antibody ELISA (Bio-Mérieux, France) at the local CDC were confirmed using Western-blot", which means these samples were for HIV infection testing, so the individuals were treatment naive, and had not previously received ARV drugs.	None
25410050	16	Which drugs were received by individuals in the study before sample sequencing?	A total of 451 HIV-1-positive patient samples were collected by local CDC staff from 2004 to 2008 (Table 1). Data were collected using an interviewer-administered questionnaire [4]. Every participant was assigned a unique and confidential identifier code for the questionnaire and specimens. Demographic variables were collected including age, gender, ethnicity, transmission route, education, birth…	The paper mentioned that "All blood samples originally tested by HIV antibody ELISA (Bio-Mérieux, France) at the local CDC were confirmed using Western-blot", which means these samples were for HIV infection testing, so the individuals were treatment naive, and had not previously received ARV drugs.	None
25411830	1	Does the paper report HIV sequences from patient samples?	"The HIV-1 protease (PR) and reverse transcriptase (RT) regions were sequenced HIV-1 RNA was extracted from plasma (QIAamp Viral RNA Mini Kit/QIAGEN, Qiagen GmbH), reverse transcribed, and the complementary DNA (cDNA) was used as the target for a nested polymerase chain reaction (nested PCR) of the *pol* region as previously described In 106 out of 138 patients (76.8%) the PR and RT regions of HI…	The paper mentions that HIV-1 protease (PR) and reverse transcriptase (RT) regions were sequenced from patient samples. Specifically, it states that "HIV-1 RNA was extracted from plasma," and "In 106 out of 138 patients (76.8%) the PR and RT regions of HIV-1 were amplified, sequenced, and described in this study."	Yes
25411830	2	Does the paper report in vitro drug susceptibility data?	HIV-1-transmitted drug resistance (TDR) and genetic diversity were investigated among 106 antiretroviral (ARV)-naive patients from Maranhão State, northeast. The HIV-1 protease (PR) and reverse transcriptase (RT) regions were sequenced; subtypes were assigned by REGA/phylogenetic analysis. TDR to the nucleoside/nonnucleoside reverse transcriptase inhibitor (NRTI/NNRTI) and protease inhibitor (PI)…	The paper does not mention performing in vitro drug susceptibility assays. The paper focuses on sequencing the HIV-1 protease (PR) and reverse transcriptase (RT) regions and analyzing transmitted drug resistance (TDR) mutations.	No
25411830	3	Were sequences from the paper made publicly available?	"The GenBank accession numbers of sequences analyzed in this study are KF782680-KF782785."	The paper provides the GenBank accession numbers for the sequences analyzed in the study in the "Sequence Data" section.	Yes
25411830	4	What were the GenBank accession numbers for sequenced HIV isolates?	"The GenBank accession numbers of sequences analyzed in this study are KF782680-KF782785."	The paper provides the GenBank accession numbers for the sequences analyzed in the study in the "Sequence Data" section.	KF782680-KF782785
25411830	5	How many individuals had samples obtained for HIV sequencing?	"In 106 out of 138 patients (76.8%) the PR and RT regions of HIV-1 were amplified, sequenced, and described in this study."	The paper states that PR and RT regions of HIV-1 were amplified, sequenced, and described in 106 out of 138 patients.	106
25411830	6	From which countries were the sequenced samples obtained?	Low Rate of Transmitted Drug Resistance May Indicate Low Access to Antiretroviral Treatment in Maranhão State, Northeast Brazil. A total of 138 consecutive cases of ARV-naive patients infected with HIV-1 living in Maranhão State were enrolled (January–June 2012)	The paper focuses on HIV-1 samples from Maranhão State, northeast Brazil.	Brazil
25411830	7	From what years were the sequenced samples obtained?	"A total of 138 consecutive cases of ARV-naive patients infected with HIV-1 living in Maranhão State were enrolled (January--June 2012)."	The paper states that the patients were enrolled from January to June 2012.	2012
25411830	8	Were samples cloned prior to sequencing?	"After purification of amplicons (QIAquick PCR Purification Kit/QIAGEN, Qiagen GmbH), genomic sequencing was performed (BigDye Terminator Cycle Sequencing, Applied Biosystems, Foster City, CA; ABI Prism 3130 Genetic Analyzer, Applied Biosystems, Foster City, CA)."	The paper does not mention any process of cloning samples prior to sequencing.	No
25411830	9	Which HIV genes were reported to have been sequenced?	"The HIV-1 protease (PR) and reverse transcriptase (RT) regions were sequenced In 106 out of 138 patients (76.8%) the PR and RT regions of HIV-1 were amplified, sequenced, and described in this study."	The paper specifically mentions that the HIV-1 protease (PR) and reverse transcriptase (RT) regions were sequenced from patient samples.	PR, RT
25411830	10	What method was used for sequencing?	"After purification of amplicons (QIAquick PCR Purification Kit/QIAGEN, Qiagen GmbH), genomic sequencing was performed (BigDye Terminator Cycle Sequencing, Applied Biosystems, Foster City, CA; ABI Prism 3130 Genetic Analyzer, Applied Biosystems, Foster City, CA)."	The paper mentions that genomic sequencing was performed using the BigDye Terminator Cycle Sequencing method and an ABI Prism 3130 Genetic Analyzer, which are associated with Sanger sequencing.	Sanger sequencing
25411830	11	What type of samples were sequenced?	HIV-1 RNA was extracted from plasma (QIAamp Viral RNA Mini Kit/QIAGEN, Qiagen GmbH).	The paper states that HIV-1 RNA was extracted from plasma for sequencing.	Plasma
25411830	12	Were any sequences obtained from individuals with virological failure on a treatment regimen?	HIV-1-transmitted drug resistance (TDR) and genetic diversity were investigated among 106 antiretroviral (ARV)-naive patients from Maranhão State, northeast. A total of 138 consecutive cases of ARV-naive patients infected with HIV-1 living in Maranhão State were enrolled (January--June 2012).	The paper focuses on ARV-naive patients, meaning they had not received antiretroviral treatment (ARV) before the samples were taken.	No
25411830	13	Were the patients in the study in a clinical trial?	This study was approved by the regional Institutional Review Boards (Comitê de Ética em Pesquisa da Faculdade de Ciências Médicas da Universidade Estadual do Piauí, protocol #022/2011, and Comitê de Ética de Pesquisa do Hospital de Doenças Tropicais Dr Natan Portela, protocol #16/2011). All participants were instructed about the study and signed a written informed consent form. This is the first …	The paper does not mention that the patients were part of a clinical trial. It describes a molecular epidemiological investigation of ARV-naive patients.	No
25411830	14	Does the paper report HIV sequences from individuals who had previously received ARV drugs?	HIV-1-transmitted drug resistance (TDR) and genetic diversity were investigated among 106 antiretroviral (ARV)-naive patients from Maranhão State, northeast. A total of 138 consecutive cases of ARV-naive patients infected with HIV-1 living in Maranhão State were enrolled (January--June 2012).	The paper focuses on ARV-naive patients, meaning they had not received antiretroviral treatment (ARV) before the samples were taken.	No
25411830	15	Which drug classes were received by individuals in the study before sample sequencing?	HIV-1-transmitted drug resistance (TDR) and genetic diversity were investigated among 106 antiretroviral (ARV)-naive patients from Maranhão State, northeast. A total of 138 consecutive cases of ARV-naive patients infected with HIV-1 living in Maranhão State were enrolled (January--June 2012).	The paper focuses on ARV-naive patients, meaning they had not received antiretroviral treatment (ARV) before the samples were taken.	None
25411830	16	Which drugs were received by individuals in the study before sample sequencing?	HIV-1-transmitted drug resistance (TDR) and genetic diversity were investigated among 106 antiretroviral (ARV)-naive patients from Maranhão State, northeast. A total of 138 consecutive cases of ARV-naive patients infected with HIV-1 living in Maranhão State were enrolled (January--June 2012).	The paper focuses on ARV-naive patients, meaning they had not received antiretroviral treatment (ARV) before the samples were taken.	None
25413141	1	Does the paper report HIV sequences from patient samples?	"Here, we report application of high-throughput near-full-length genome (NFLG) and partial HIV-1 proviral genome deep sequencing to characterize HIV in recently infected blood donors at four major blood centers in Brazil. From 2007-2011, 341 HIV+ blood donors from 4 blood centers were recruited to participate in a case control study to identify HIV risk factors and motivations to donate. Of the 4…	The paper reports HIV sequences from patient samples, specifically from recently infected blood donors at four major blood centers in Brazil. The study involved sequencing the HIV-1 proviral genome from these samples.	Yes
25413141	2	Does the paper report in vitro drug susceptibility data?	From 2007-2011, 341 HIV+ blood donors from 4 blood centers were recruited to participate in a case control study to identify HIV risk factors and motivations to donate. Forty-seven (17 from São Paulo [SP], 8 from Minas Gerais [MG], 11 from Pernambuco [PE] and 11 from Rio de Janeiro [RJ]) were classified as recently infected based on testing by less-sensitive enzyme immunoassays. Five overlapping …	The paper does not mention any in vitro drug susceptibility testing. It focuses on sequencing and characterizing the HIV-1 proviral genome from patient samples and analyzing transmitted drug resistance mutations.	No
25413141	3	Were sequences from the paper made publicly available?	"All consensus genome assemblies generated in this study were submitted to NCBI's GenBank database (Accession numbers KJ849784 - KJ849827)."	The paper explicitly states that the consensus genome assemblies generated in the study were submitted to NCBI's GenBank database with accession numbers ranging from KJ849784 to KJ849827.	Yes
25413141	4	What were the GenBank accession numbers for sequenced HIV isolates?	"All consensus genome assemblies generated in this study were submitted to NCBI's GenBank database (Accession numbers KJ849784 - KJ849827)."	The paper explicitly states that the consensus genome assemblies generated in the study were submitted to NCBI's GenBank database with accession numbers ranging from KJ849784 to KJ849827.	KJ849784 - KJ849827
25413141	5	How many individuals had samples obtained for HIV sequencing?	"Forty-seven (17 from São Paulo [SP], 8 from Minas Gerais [MG], 11 from Pernambuco [PE] and 11 from Rio de Janeiro [RJ]) were classified as recently infected based on testing by less-sensitive enzyme immunoassays. Of the 47 recently infected donor samples studied, 39 (82.9%) NFLGs and 6 (12.7%) partial fragments were de novo assembled into contiguous sequences and successfully subtyped."	The paper states that 47 recently infected blood donors were included in the study for sequencing the HIV-1 proviral genome.	47
25413141	6	From which countries were the sequenced samples obtained?	"Here, we report application of high-throughput near-full-length genome (NFLG) and partial HIV-1 proviral genome deep sequencing to characterize HIV in recently infected blood donors at four major blood centers in Brazil. From 2007-2011, 341 HIV+ blood donors from 4 blood centers were recruited to participate in a case control study to identify HIV risk factors and motivations to donate."	The paper clearly states that the samples were obtained from blood donors at four major blood centers in Brazil.	Brazil
25413141	7	From what years were the sequenced samples obtained?	"From 2007-2011, 341 HIV+ blood donors from 4 blood centers were recruited to participate in a case control study to identify HIV risk factors and motivations to donate."	The paper mentions that the samples were collected from 2007 to 2011.	2007-2011
25413141	8	Were samples cloned prior to sequencing?	Five overlapping amplicons spanning the HIV genome were PCR amplified from peripheral blood mononuclear cells (PBMCs). The amplicons were molecularly bar-coded, pooled, and sequenced by an Illumina paired-end protocol. The amplicons were molecularly bar-coded, pooled, and sequenced by an Illumina paired-end protocol. Finally, all libraries were pooled and loaded on an Illumina MiSeq for paired-en…	The paper does not mention any cloning of samples prior to sequencing.	No
25413141	9	Which HIV genes were reported to have been sequenced?	"Here, we report application of high-throughput near-full-length genome (NFLG) and partial HIV-1 proviral genome deep sequencing to characterize HIV in recently infected blood donors at four major blood centers in Brazil. Five overlapping amplicons spanning the HIV genome were PCR amplified from peripheral blood mononuclear cells (PBMCs)."	The paper reports sequencing near full-length genomes (NFLGs) of HIV-1 proviral DNA from the samples.	Near full length genome
25413141	10	What method was used for sequencing?	The amplicons were molecularly bar-coded, pooled, and sequenced by an Illumina paired-end protocol. Finally, all libraries were pooled and loaded on an Illumina MiSeq for paired-end 250 sequencing.	The paper describes the use of an Illumina paired-end protocol for sequencing the HIV-1 proviral genome.	Illumina sequencing
25413141	11	What type of samples were sequenced?	Five overlapping amplicons spanning the HIV genome were PCR amplified from peripheral blood mononuclear cells (PBMCs).	Paper mentioned amplicons were "amplified from peripheral blood mononuclear cells (PBMCs)."	PBMC
25413141	12	Were any sequences obtained from individuals with virological failure on a treatment regimen?	Here, we report application of high-throughput near-full-length genome (NFLG) and partial HIV-1 proviral genome deep sequencing to characterize HIV in recently infected blood donors at four major blood centers in Brazil. From 2007-2011, 341 HIV+ blood donors from 4 blood centers were recruited to participate in a case control study to identify HIV risk factors and motivations to donate.	The paper mentioned the genome samples were from blood donors from 4 blood centers. Blood donors were treatment-naïve, so individuals hadn't previously received ARV drugs.	No
25413141	13	Were the patients in the study in a clinical trial?	From 2007-2011, 341 HIV+ blood donors from 4 blood centers were recruited to participate in a case control study to identify HIV risk factors and motivations to donate.	The paper does not mention that the patients were part of a clinical trial. It describes a case control study, and samples were from donate blood.	No
25413141	14	Does the paper report HIV sequences from individuals who had previously received ARV drugs?	Here, we report application of high-throughput near-full-length genome (NFLG) and partial HIV-1 proviral genome deep sequencing to characterize HIV in recently infected blood donors at four major blood centers in Brazil. From 2007-2011, 341 HIV+ blood donors from 4 blood centers were recruited to participate in a case control study to identify HIV risk factors and motivations to donate.	The paper mentioned the genome samples were from blood donors from 4 blood centers. Blood donors were treatment-naïve, so individuals hadn't previously received ARV drugs.	No
25413141	15	Which drug classes were received by individuals in the study before sample sequencing?	Here, we report application of high-throughput near-full-length genome (NFLG) and partial HIV-1 proviral genome deep sequencing to characterize HIV in recently infected blood donors at four major blood centers in Brazil. From 2007-2011, 341 HIV+ blood donors from 4 blood centers were recruited to participate in a case control study to identify HIV risk factors and motivations to donate.	The paper mentioned the genome samples were from blood donors from 4 blood centers. Blood donors were treatment-naïve, so individuals hadn't previously received ARV drugs.	None
25413141	16	Which drugs were received by individuals in the study before sample sequencing?	Here, we report application of high-throughput near-full-length genome (NFLG) and partial HIV-1 proviral genome deep sequencing to characterize HIV in recently infected blood donors at four major blood centers in Brazil. From 2007-2011, 341 HIV+ blood donors from 4 blood centers were recruited to participate in a case control study to identify HIV risk factors and motivations to donate.	The paper mentioned the genome samples were from blood donors from 4 blood centers. Blood donors were treatment-naïve, so individuals hadn't previously received ARV drugs.	None
25414202	1	Does the paper report HIV sequences from patient samples?	"Two non-polymorphic mutations (G118R and F121Y) were recently reported in two patients failing raltegravir treatment. Interestingly, the G118R and F121Y INs, which were previously described in patients failing raltegravir treatment, showed resistance to both raltegravir and dolutegravir in vitro."	The paper mentions that the G118R and F121Y mutations were identified in patients failing raltegravir treatment. This indicates that the study involved analyzing HIV sequences from patient samples.	Yes
25414202	2	Does the paper report in vitro drug susceptibility data?	Both the F121Y and G118R mutations were introduced by site-directed mutagenesis into the pNL4.3 backbone and studied in cell-based and in vitro assays. The effects of the mutations were characterized at the different steps of infection by quantitative PCR. Results obtained with in vitro and ex vivo assays consistently showed that both mutations impaired the catalytic properties of integrase, espe…	The paper mentions in vitro assay test of mutations, and mentions the intermediate level of resistance to dolutegravir.	Yes
25414202	3	Were sequences from the paper made publicly available?	No evidence	The paper does not provide any GenBank accession numbers for the sequenced HIV isolates. The focus is on the characterization of specific mutations and their resistance profiles.	No
25414202	4	What were the GenBank accession numbers for sequenced HIV isolates?	No evidence	The paper does not provide any GenBank accession numbers for the sequenced HIV isolates. The focus is on the characterization of specific mutations and their resistance profiles.	Not reported
25414202	5	How many individuals had samples obtained for HIV sequencing?	Both the F121Y and G118R mutations were introduced by site-directed mutagenesis into the pNL4.3 backbone and studied in cell-based and in vitro assays. The effects of the mutations were characterized at the different steps of infection by quantitative PCR.	The paper mentioned the study conducted site-directed mutagenesis into the pNL4.3 backbone. pNL4.3 is a lab isolates. This means no samples were from individuals, so it's not reported.	Not reported
25414202	6	From which countries were the sequenced samples obtained?	No evidence	The paper does not provide information on the countries from which the sequenced samples were obtained.	Not reported
25414202	7	From what years were the sequenced samples obtained?	No evidence	The paper does not specify the years during which the sequenced samples were obtained.	Not reported
25414202	8	Were samples cloned prior to sequencing?	Both the F121Y and G118R mutations were introduced by site-directed mutagenesis into the pNL4.3 backbone and studied in cell-based and in vitro assays. The effects of the mutations were characterized at the different steps of infection by quantitative PCR.	The paper mentioned the study conducted site-directed mutagenesis into the pNL4.3 backbone. pNL4.3 is a lab isolates. This means no samples were from individuals, so it's not reported.	Not reported
25414202	9	Which HIV genes were reported to have been sequenced?	"HIV-1 IN mutants were obtained by site-directed mutagenesis using the QuikChange Lightning site-directed mutagenesis kit (Agilent) according to the manufacturer's instructions. Briefly, the fragment encoding the IN of the replication-competent pNL4.3 virus was digested with AgeI and EcoRI and inserted into the pGEM-T vector (Promega)."	The paper focuses on the sequencing and characterization of mutations in the HIV-1 integrase (IN) gene. This is evident from the methods and results sections, which describe the introduction of mutations into the integrase gene and the subsequent analysis of their effects.	IN
25414202	10	What method was used for sequencing?	Both the F121Y and G118R mutations were introduced by site-directed mutagenesis into the pNL4.3 backbone and studied in cell-based and in vitro assays. The effects of the mutations were characterized at the different steps of infection by quantitative PCR.	The paper mentioned the study conducted site-directed mutagenesis into the pNL4.3 backbone. pNL4.3 is a lab isolates. This means no samples were from individuals, so it's not reported.	Not reported
25414202	11	What type of samples were sequenced?	Both the F121Y and G118R mutations were introduced by site-directed mutagenesis into the pNL4.3 backbone and studied in cell-based and in vitro assays. The effects of the mutations were characterized at the different steps of infection by quantitative PCR.	The paper mentioned the study conducted site-directed mutagenesis into the pNL4.3 backbone. pNL4.3 is a lab isolates. This means no samples were from individuals, so it's not reported.	Not reported
25414202	12	Were any sequences obtained from individuals with virological failure on a treatment regimen?	Both the F121Y and G118R mutations were introduced by site-directed mutagenesis into the pNL4.3 backbone and studied in cell-based and in vitro assays. The effects of the mutations were characterized at the different steps of infection by quantitative PCR.	The paper mentioned the study conducted site-directed mutagenesis into the pNL4.3 backbone. pNL4.3 is a lab isolates. This means no samples were from individuals, so it's not reported.	Not reported
25414202	13	Were the patients in the study in a clinical trial?	Both the F121Y and G118R mutations were introduced by site-directed mutagenesis into the pNL4.3 backbone and studied in cell-based and in vitro assays. The effects of the mutations were characterized at the different steps of infection by quantitative PCR.	The paper mentioned the study conducted site-directed mutagenesis into the pNL4.3 backbone. pNL4.3 is a lab isolates. This means no samples were from individuals, so it's not reported.	Not reported
25414202	14	Does the paper report HIV sequences from individuals who had previously received ARV drugs?	Both the F121Y and G118R mutations were introduced by site-directed mutagenesis into the pNL4.3 backbone and studied in cell-based and in vitro assays. The effects of the mutations were characterized at the different steps of infection by quantitative PCR.	The paper mentioned the study conducted site-directed mutagenesis into the pNL4.3 backbone. pNL4.3 is a lab isolates. This means no samples were from individuals, so it's not reported.	Not reported
25414202	15	Which drug classes were received by individuals in the study before sample sequencing?	Both the F121Y and G118R mutations were introduced by site-directed mutagenesis into the pNL4.3 backbone and studied in cell-based and in vitro assays. The effects of the mutations were characterized at the different steps of infection by quantitative PCR.	The paper mentioned the study conducted site-directed mutagenesis into the pNL4.3 backbone. pNL4.3 is a lab isolates. This means no samples were from individuals, so it's not reported.	Not reported
25414202	16	Which drugs were received by individuals in the study before sample sequencing?	Both the F121Y and G118R mutations were introduced by site-directed mutagenesis into the pNL4.3 backbone and studied in cell-based and in vitro assays. The effects of the mutations were characterized at the different steps of infection by quantitative PCR.	The paper mentioned the study conducted site-directed mutagenesis into the pNL4.3 backbone. pNL4.3 is a lab isolates. This means no samples were from individuals, so it's not reported.	Not reported
[truncated: 3,184 more rows]
